# Supplementary material for: Mechanistic insight into cobalt-mediated [2 + 2 + 2]-cycloaddition reactions with γ-alkylidenebutenolide and γ-alkylidenebuterolactam as 2π partners
Source: Royal Society of Chemistry journal article supplement (doi:10.1039/d3dt02291a), 2023-01-01
Supplement: d3dt02291a1.pdf [file d3dt02291a1.pdf]

## Electronic Supplementary Information (ESI)

### Mechanistic Insight into Cobalt-Mediated [2+2+2]-Cycloaddition Reactions with $\gamma$ -Alkylidenebutenolide and $\gamma$ -Alkylidenebuterolactam as 2 $\pi$ Partners.

Léo Chaussy,<sup>†a</sup> Marion Delorme,<sup>†a</sup> Alexander Punter,<sup>a</sup> Yannick Carissan,<sup>a</sup> Jean-Luc Parrain,<sup>a</sup> Muriel Amatore,<sup>\*a</sup> Paola Nava<sup>\*a</sup> and Laurent Commeiras<sup>\*a</sup>

Aix Marseille Univ, CNRS, Centrale Marseille, iSm2, Marseille, France.

e-mail: [muriel.amatore@univ-amu.fr](mailto:muriel.amatore@univ-amu.fr), [paola.nava@univ-amu.fr](mailto:paola.nava@univ-amu.fr), [laurent.commeiras@univ-amu.fr](mailto:laurent.commeiras@univ-amu.fr)

<sup>†</sup> These authors contributed equally.

#### Table of Contents

|                                                                                                                    |    |
|--------------------------------------------------------------------------------------------------------------------|----|
| Structures of intermediates <b>III<sub>exo1</sub></b> , <b>III<sub>exo2</sub></b> and <b>III<sup>O</sup></b> ..... | 2  |
| Dimethyl-substituted $\gamma$ -alkylidenebutenolide .....                                                          | 3  |
| Lactam case: <i>E</i> isomer .....                                                                                 | 4  |
| Lactam case: comparison between computational methods .....                                                        | 5  |
| Characterization of compounds <b>3a</b> , <b>4a</b> , <b>5a-c</b> , <b>7-9</b> .....                               | 7  |
| List of coordinates.....                                                                                           | 45 |

## Structures of intermediates $\text{III}_{\text{exo1}}$ , $\text{III}_{\text{exo2}}$ and $\text{III}^{\text{O}}$

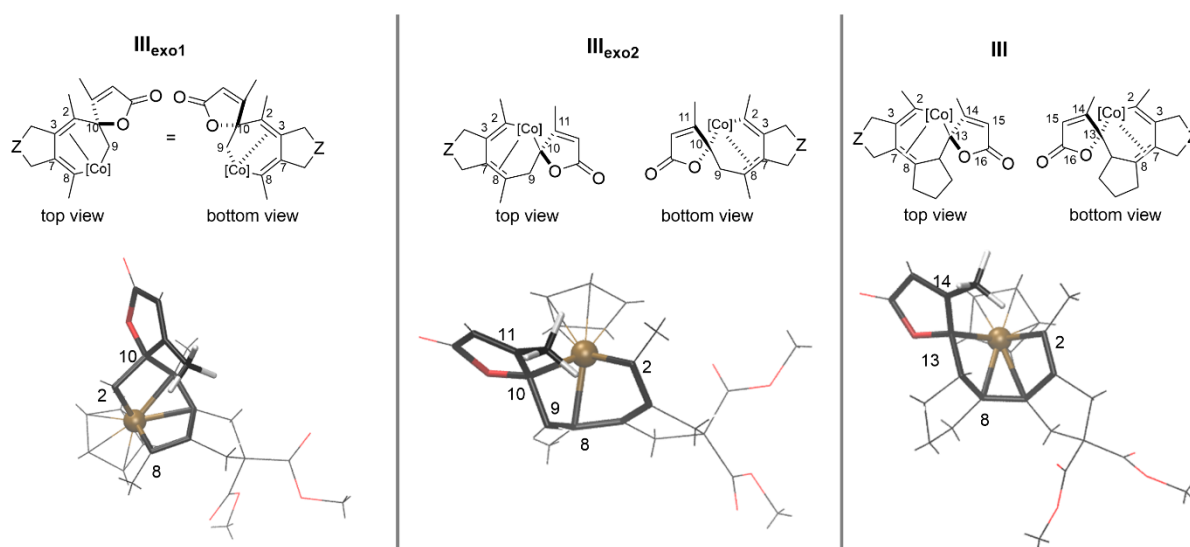

**Figure S1:** Optimized structures (bottom view) of  $\text{III}_{\text{exo1}}$ ,  $\text{III}_{\text{exo2}}$  and  $\text{III}^{\text{O}}$ .

The optimized structures of  $\text{III}_{\text{exo1}}$ ,  $\text{III}_{\text{exo2}}$  and  $\text{III}^{\text{O}}$  are shown in Figure S1. In  $\text{III}_{\text{exo1}}$ , the Co is bound to C9, which is external to the lactone, while C10 is already implicated in the bond with C2, thus in the spiro moiety. In both  $\text{III}_{\text{exo2}}$  and  $\text{III}^{\text{O}}$ , the carbon atom of the lactone ring (C10 in the intermolecular case and C13 in the intramolecular case) is connected to the Co. The next step could therefore be either the formation of the bond between C10 (or C13) and C2, leading to the spiro product, or the formation of the bond between C11 (or C14) and C2, leading to an intermediate of type **IV**.

## Dimethyl-substituted $\gamma$ -alkylidenebutenolide

Calculations were performed with the experimental  $\gamma$ -alkylidenebutenolide substrate, employed for the intermolecular reaction, which displays two methyl groups (instead of only one, as in Figure 3 in the article). The level of calculation is TPSS-D3/def2-TZVP. Solvent effects were added as computed by single point calculations on the optimized structures (COSMO model, toluene). Results are displayed in Figure S2, in terms of  $\Delta G$  relative to  $\text{II}_{\text{exo}}^{\text{Me}}$  ( $T=383.15\text{K}$ ).

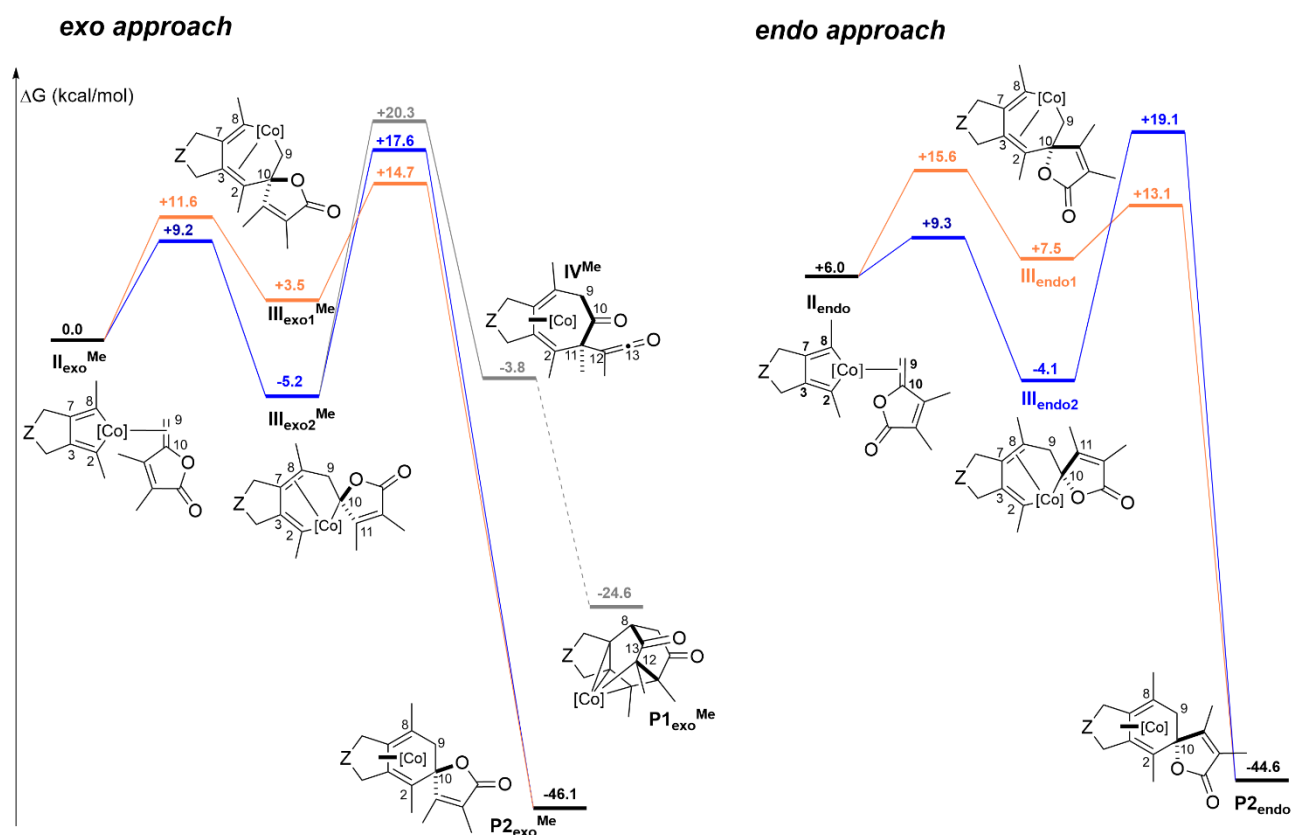

**Figure S2.** Computed *exo*- and *endo*- pathways.  $Z=\text{C}(\text{CO}_2\text{Me})_2$ ,  $[\text{Co}]=\text{CpCo}$ .  $\Delta G$  are computed at the TPSS-D3/def2-TZVP level ( $T=383.15\text{K}$ ). Solvent effects are added as single point calculations with the COSMO implicit model (toluene).

By comparing mono- to di-substituted cases,  $\Delta G$  values of corresponding stationary points differ by about 1 kcal/mol (example:  $\text{III}_{\text{exo1}}$  at 2.5 kcal/mol vs  $\text{III}_{\text{exo1}}^{\text{Me}}$  at 3.5 kcal/mol). The only exceptions concern the transition states leading to  $\text{IV}$  vs.  $\text{IV}^{\text{Me}}$ , and  $\text{IV}$  vs.  $\text{IV}_{\text{Me}}$ : the hypothetical reaction leading to the diketone product is even more disfavored in the di-substituted than in the mono-substituted case. Therefore, we have not computed the complete path to the  $\text{P1}_{\text{exo}}^{\text{Me}}$  product.

The computed profiles with the disubstituted substrate are, indeed, sensibly the same as those obtained with the monosubstituted substrate. Significantly, trends are exactly the same: both for the *exo* and *endo* approaches, two insertion steps are possible. Although barriers for the insertion steps are less accessible from the lactone side (orange paths), the pathways through them are overall favored, with barriers for the reductive elimination lower than those computed for the blue paths. In conclusion, the di-substitution does not impact the overall mechanism of the transformation.

## Lactam case: *E* isomer

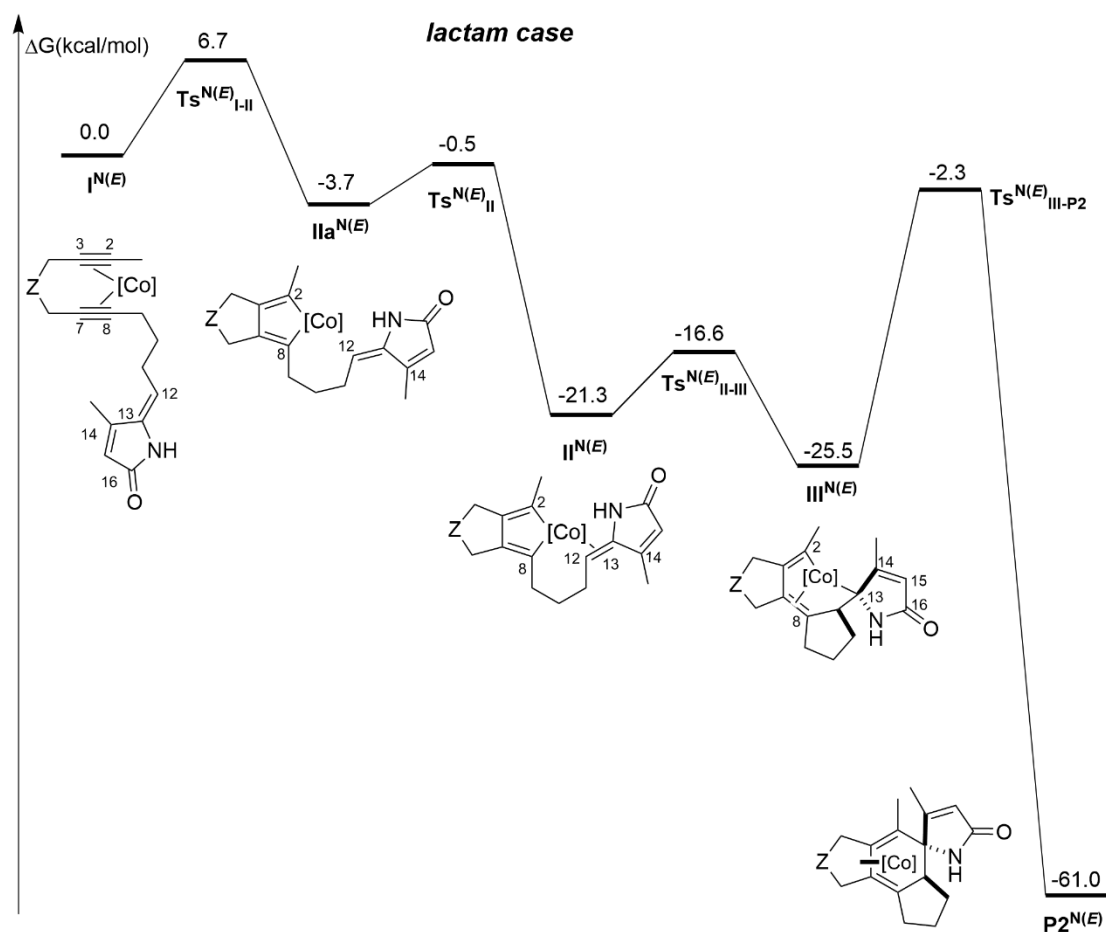

**Figure S3.** Computed pathway, for an *E*-lactam substrate,  $Z=C(\text{CO}_2\text{Me})_2$ ,  $[\text{Co}]=\text{CpCo}$ .  $\Delta G$  are computed at the TPSS-D3/def2-TZVP level ( $T=383.15\text{K}$ ). Solvent effects are added as single point calculations with the COSMO implicit model (toluene).

As the lactam substrate **8** exists in the *Z* and *E* form, calculations were also performed on an *E* isomer. Results for the pathway leading to the spiro lactam product are reported in Figure S3. Barriers are comparable to those computed for the corresponding *Z* isomer (see Figure 5 in the article). The structure of intermediate  $\text{III}^{\text{N}(\text{E})}$  is depicted in Figure S4: the C(13) atom is closer to C(2) than C(14), which is clearly not correctly positioned to react and form the C(2)-C(14) bond, necessary to continue the reactivity towards a hypothetical Co(III) complex. Thus, the path to the Co(III) complex was not computed.

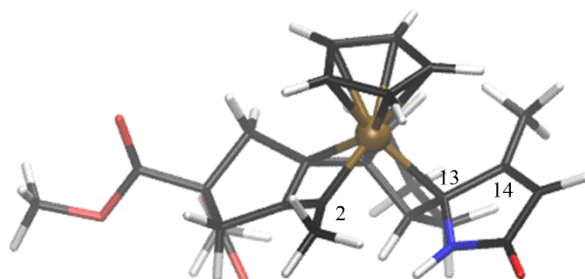

**Figure S4.** Computed structure of intermediate  $\text{III}^{\text{N}(\text{E})}$ .

## Lactam case: comparison between computational methods

The mechanistic profiles to the Co(III) and to the spiro lactam complexes were computed at several level of theory: TPSS-D3/def2-TZVP; BP86-D3/def2-TZVP; and PBE0/def2-TZVP. In each case, structures were fully optimized and the nature of the stationary points were verified by frequency calculations. Solvent effects were added as computed by single point calculations on the optimized structures (COSMO model, toluene). Results are shown in Figure S5 and  $\Delta G$  relative to **II**<sup>N</sup> are reported in Table S1 (T=383.15K).

**Table S1.**  $\Delta G$  (kcal/mol) are computed relative free-energies ( $\Delta E_{\text{Toluene}} + \Delta(\text{Chem. Pot.})$ , T=383.15K) at different level of theory for the mechanistic profiles computed for the lactam case, see Figure S1.

| System                                  | $\Delta G$ | $\Delta G$ | $\Delta G$ |
|-----------------------------------------|------------|------------|------------|
|                                         | TPSS-D3    | BP86-D3    | PBE0-D3    |
| <b>I</b> <sup>N</sup>                   | 0.0        | 0.0        | 0.0        |
| <b>Ts</b> <sup>N<sub>I-II</sub></sup>   | 7.6        | 7.5        | 8.7        |
| <b>IIa</b> <sup>N</sup>                 | -5.1       | -5.6       | -7.1       |
| <b>Ts</b> <sup>N<sub>II</sub></sup>     | -0.5       | 0.8        | 0.8        |
| <b>II</b> <sup>N</sup>                  | -18.5      | -21.6      | -18.0      |
| <b>Ts</b> <sup>N<sub>II-III</sub></sup> | -13.7      | -16.4      | -15.1      |
| <b>III</b> <sup>N</sup>                 | -21.5      | -24.1      | -28.3      |
| <b>Ts</b> <sup>N<sub>III-IV</sub></sup> | -1.7       | -6.6       | -4.0       |
| <b>IV</b> <sup>N</sup>                  | -25.9      | -30.3      | -36.8      |
| <b>Ts</b> <sup>N<sub>IV-V</sub></sup>   | -11.3      | -14.8      | -19.4      |
| <b>V</b> <sup>N</sup>                   | -14.2      | -18.1      | -22.4      |
| <b>Ts</b> <sup>N<sub>V-P1</sub></sup>   | 0.3        | -3.9       | -3.9       |
| <b>P1</b> <sup>N</sup>                  | -40.2      | -43.8      | -51.7      |
| <b>Ts</b> <sup>N<sub>III-P2</sub></sup> | -2.7       | -7.6       | -8.4       |
| <b>P2</b> <sup>N</sup>                  | -61.4      | -65.4      | -77.2      |

All computations deliver the same qualitative picture, predicting that the pathway to the Co(III) complex is less favored than the one to the spirocyclic lactam complex. However, relative energies are somewhat sensitive to the method used, notably the difference in energy between **III**<sup>N</sup> and **II**<sup>N</sup> is of -3.0 kcal/mol at the TPSS-D3 level and decreases to -10.3 kcal/mol at the PBE0-D3 level.

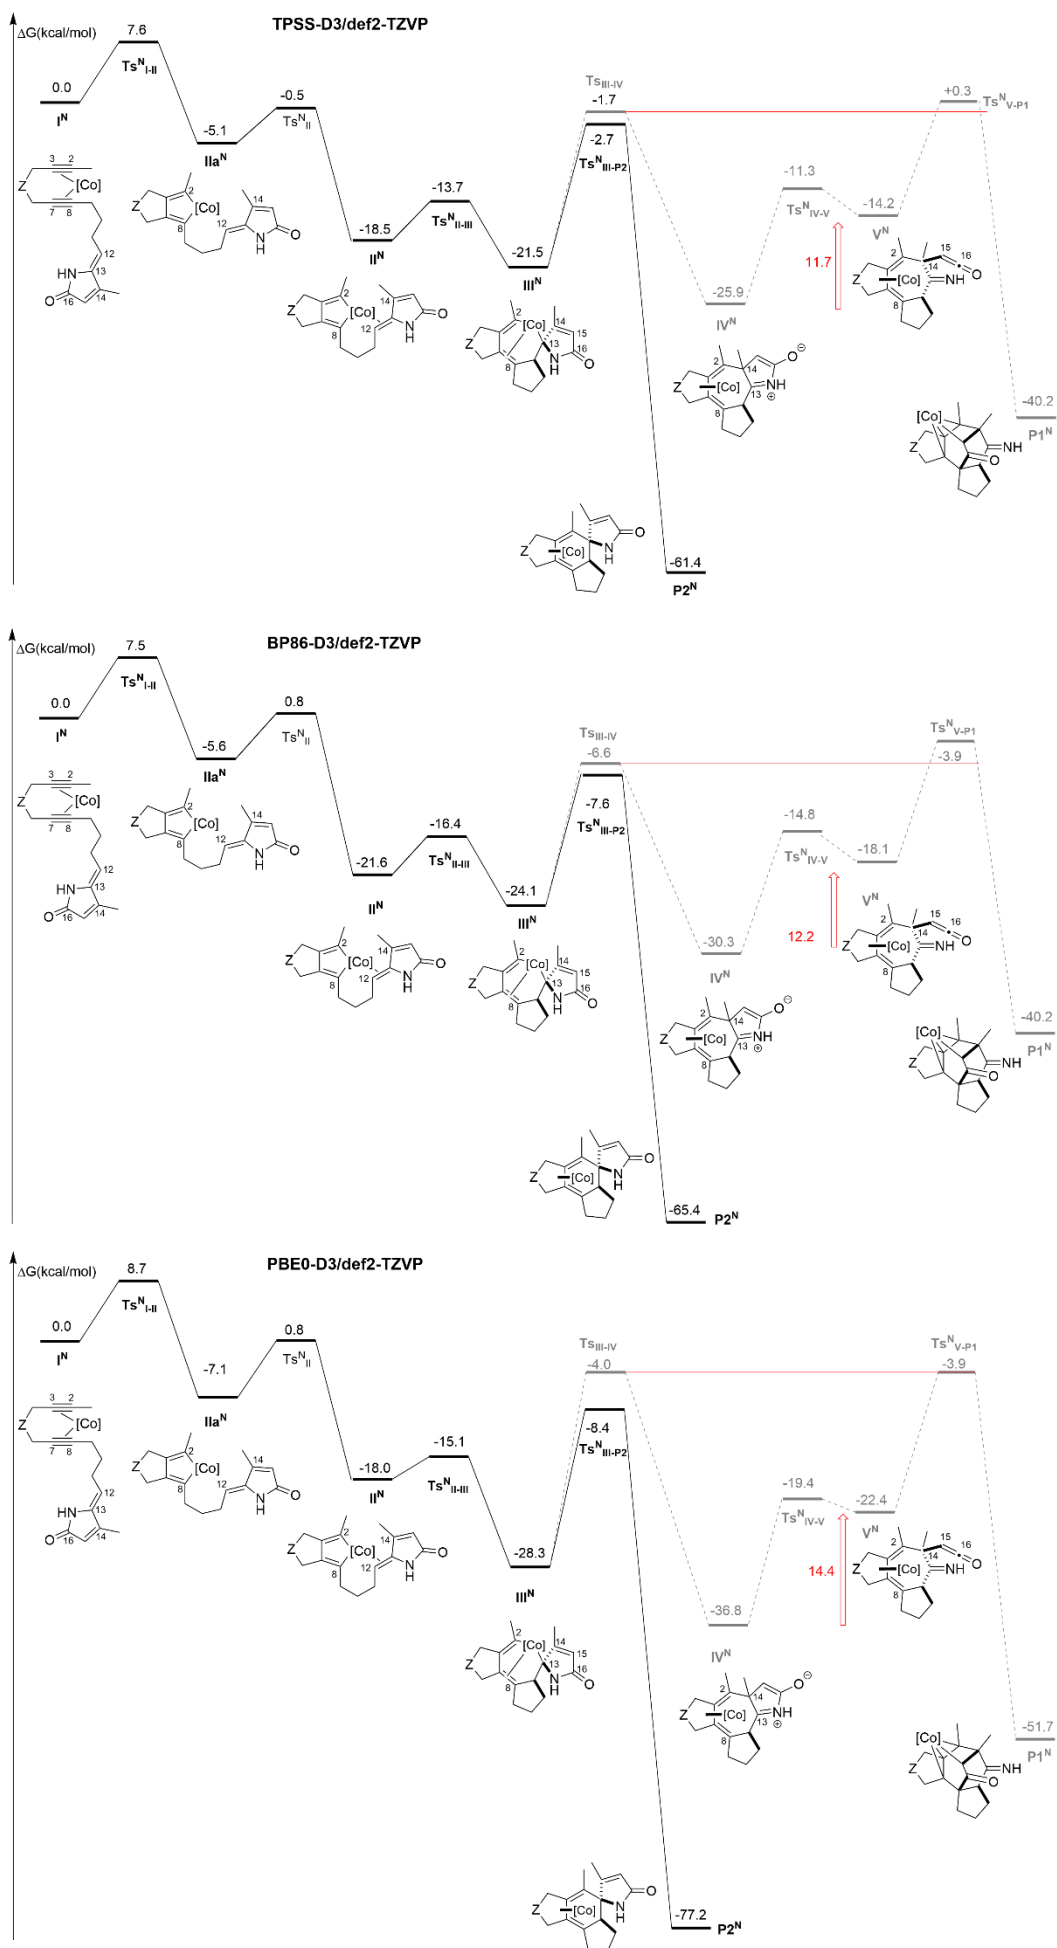

Figure S5. Computed pathways for the lactam case,  $Z=C(C(OMe)_2)$ ,  $[Co]=CpCo$ .

# Characterization of compounds 3a, 4a, 5a-c, 7-9

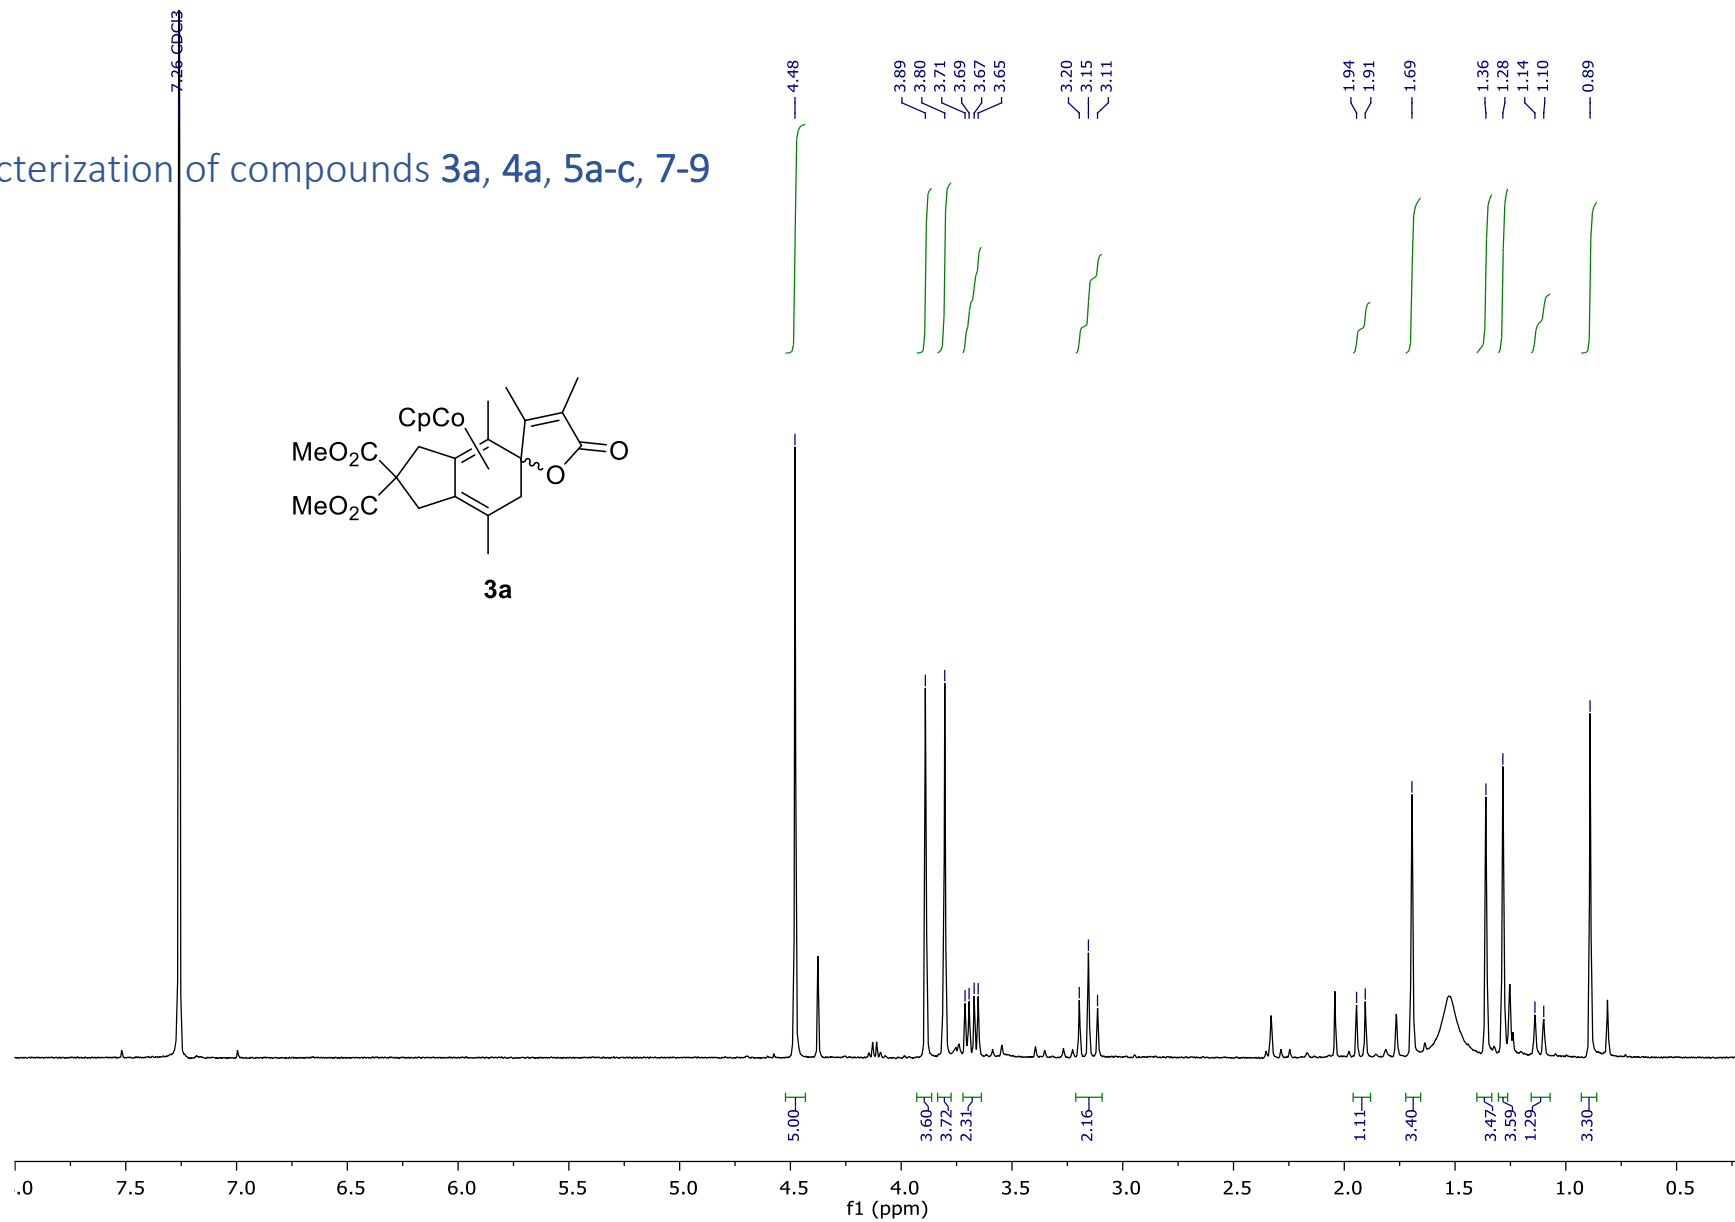

Figure S6. <sup>1</sup>H NMR (300 MHz, CDCl<sub>3</sub>) spectrum

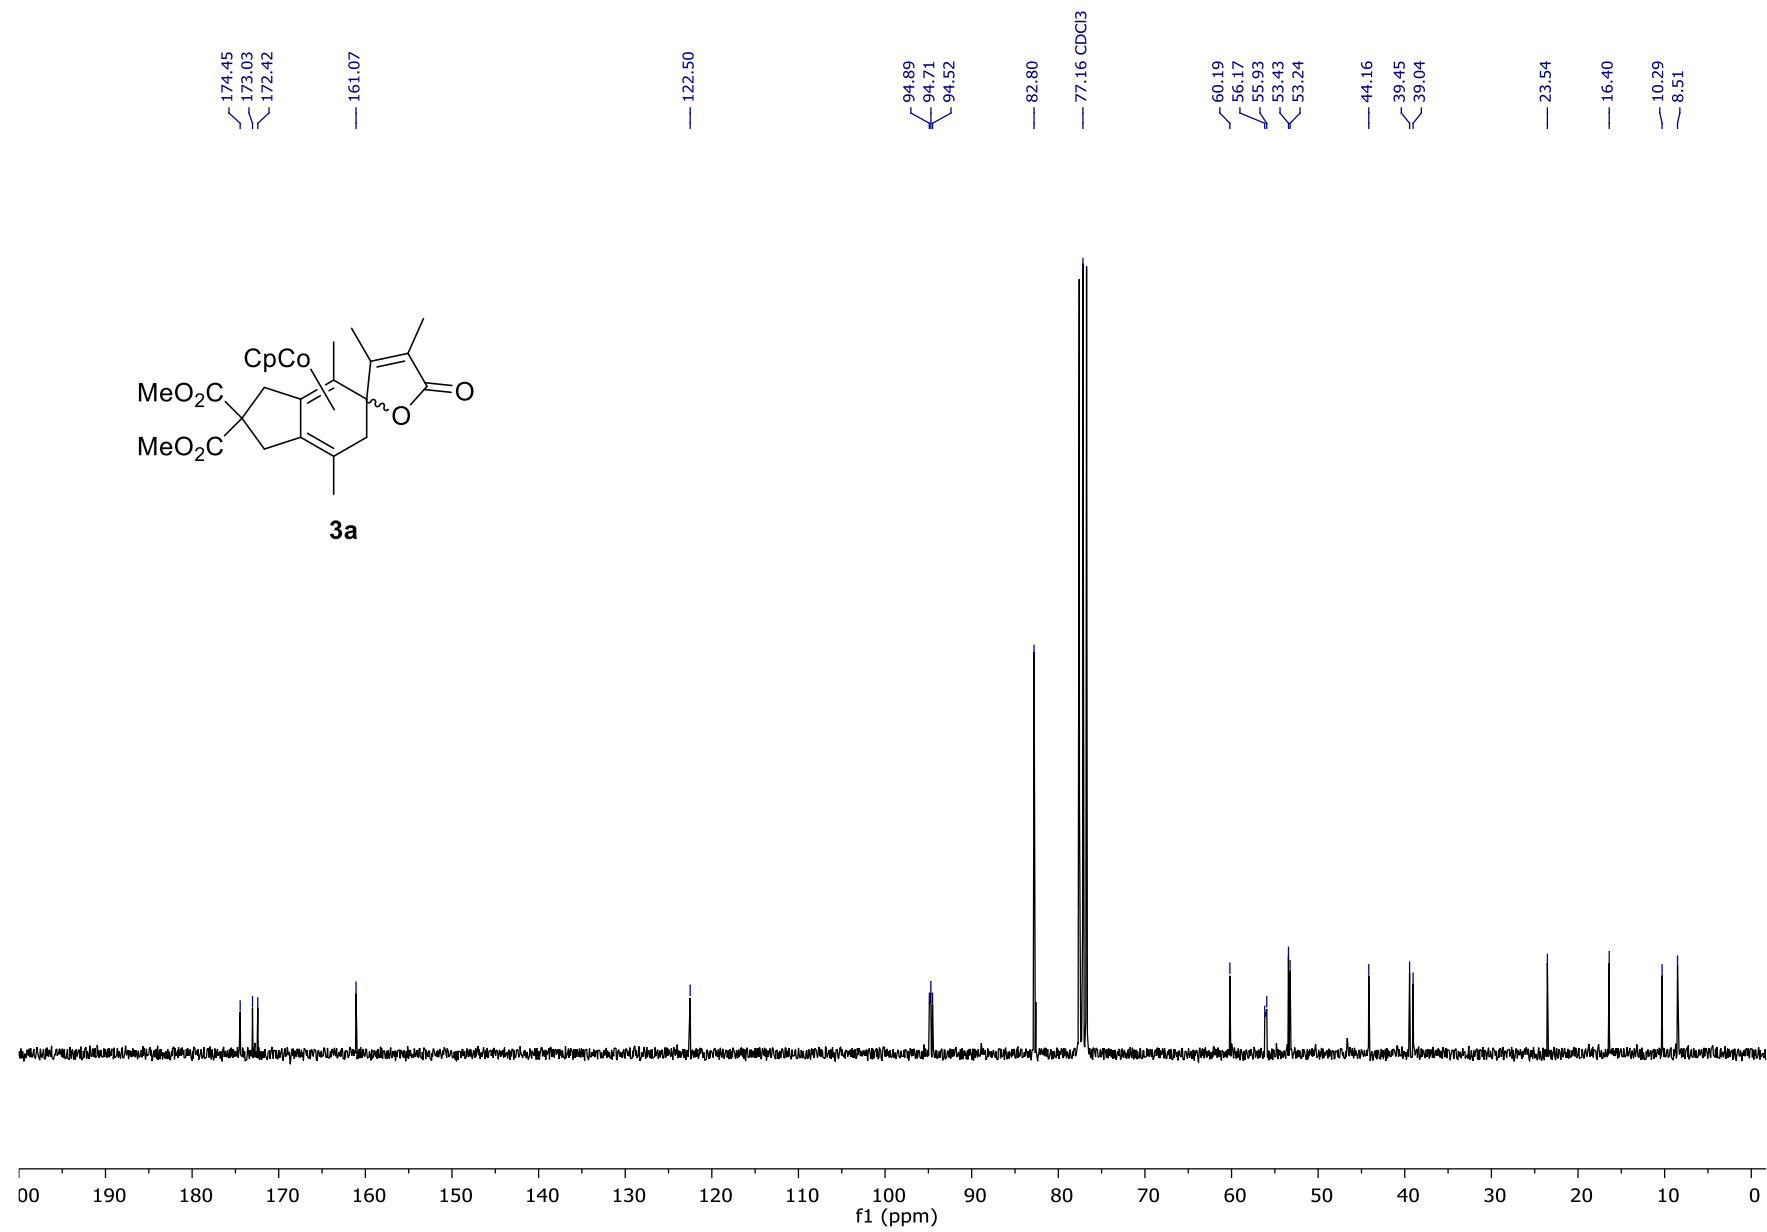

Figure S7. <sup>13</sup>C NMR (75 MHz, CDCl<sub>3</sub>) spectrum



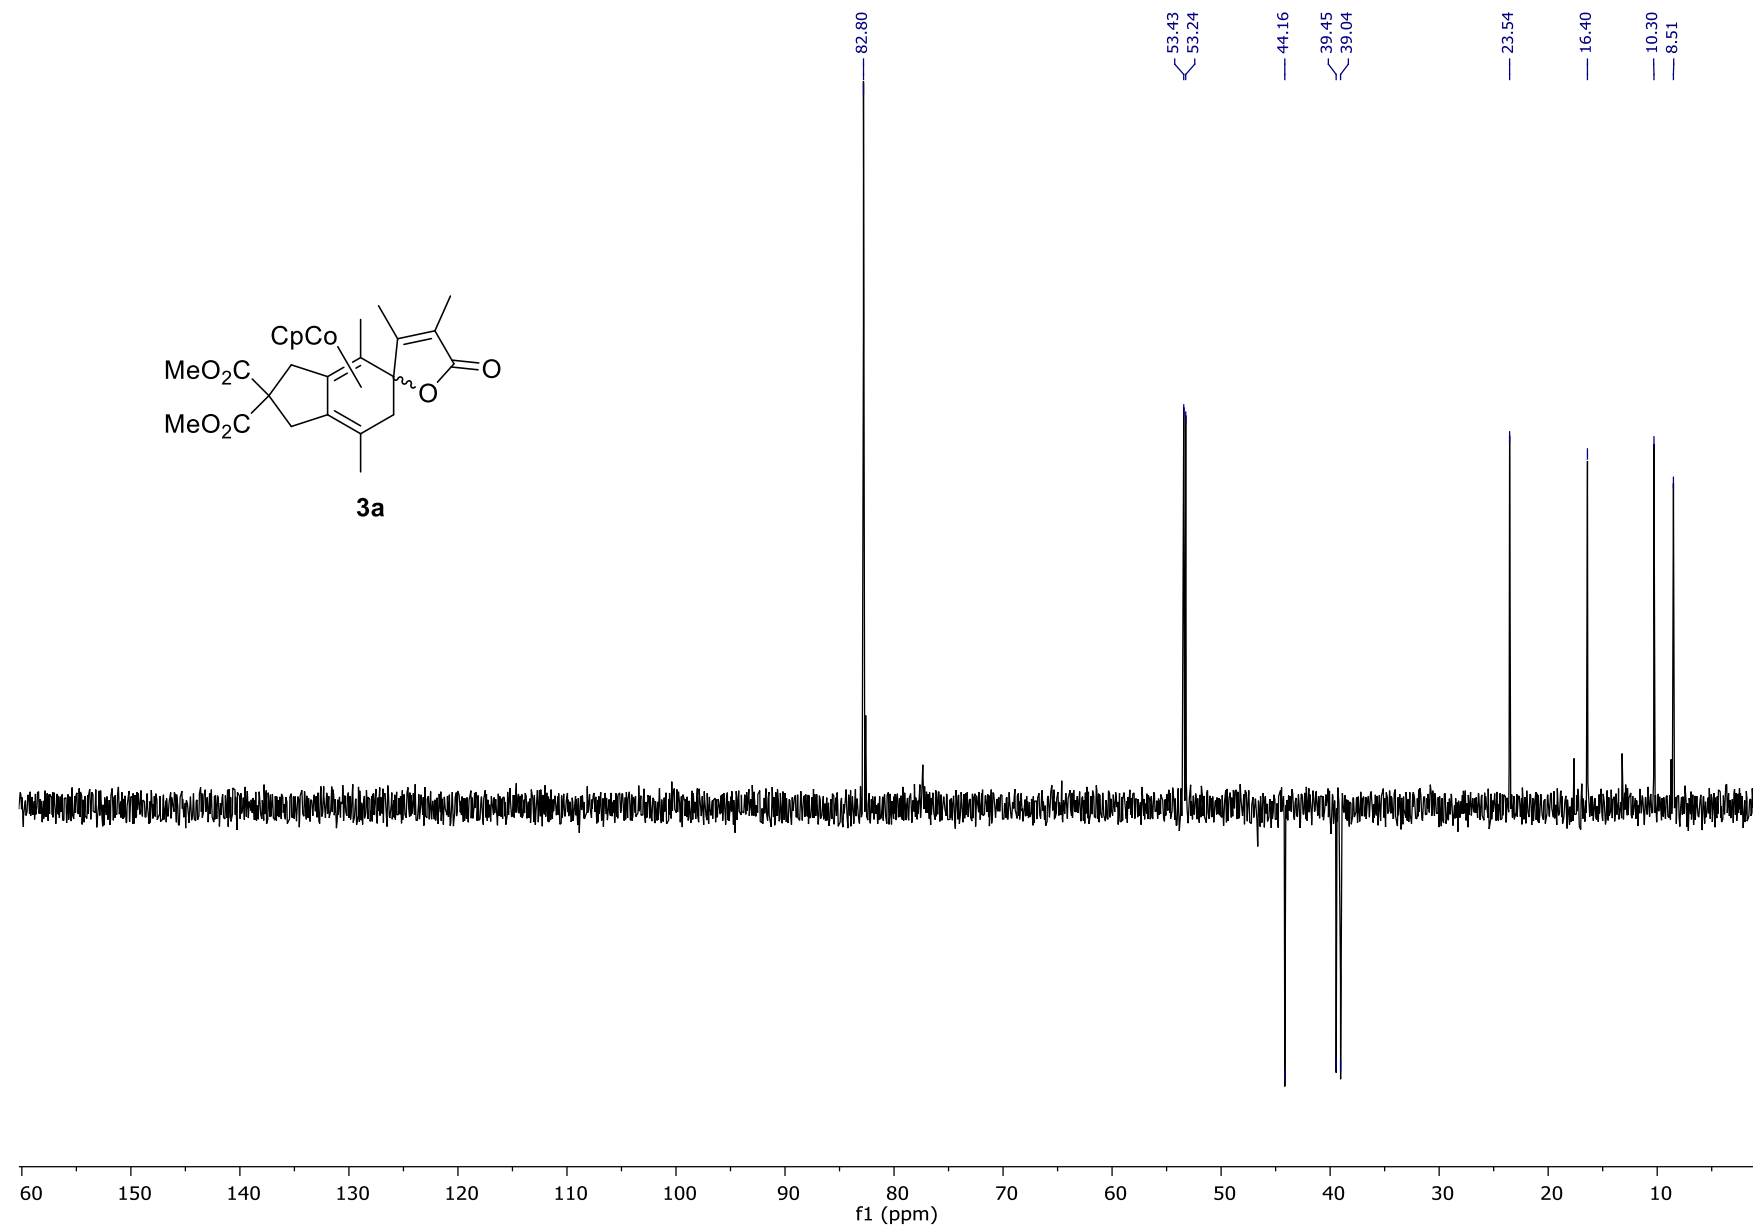

Figure S8. DEPT (75 MHz, CDCl<sub>3</sub>) spectrum

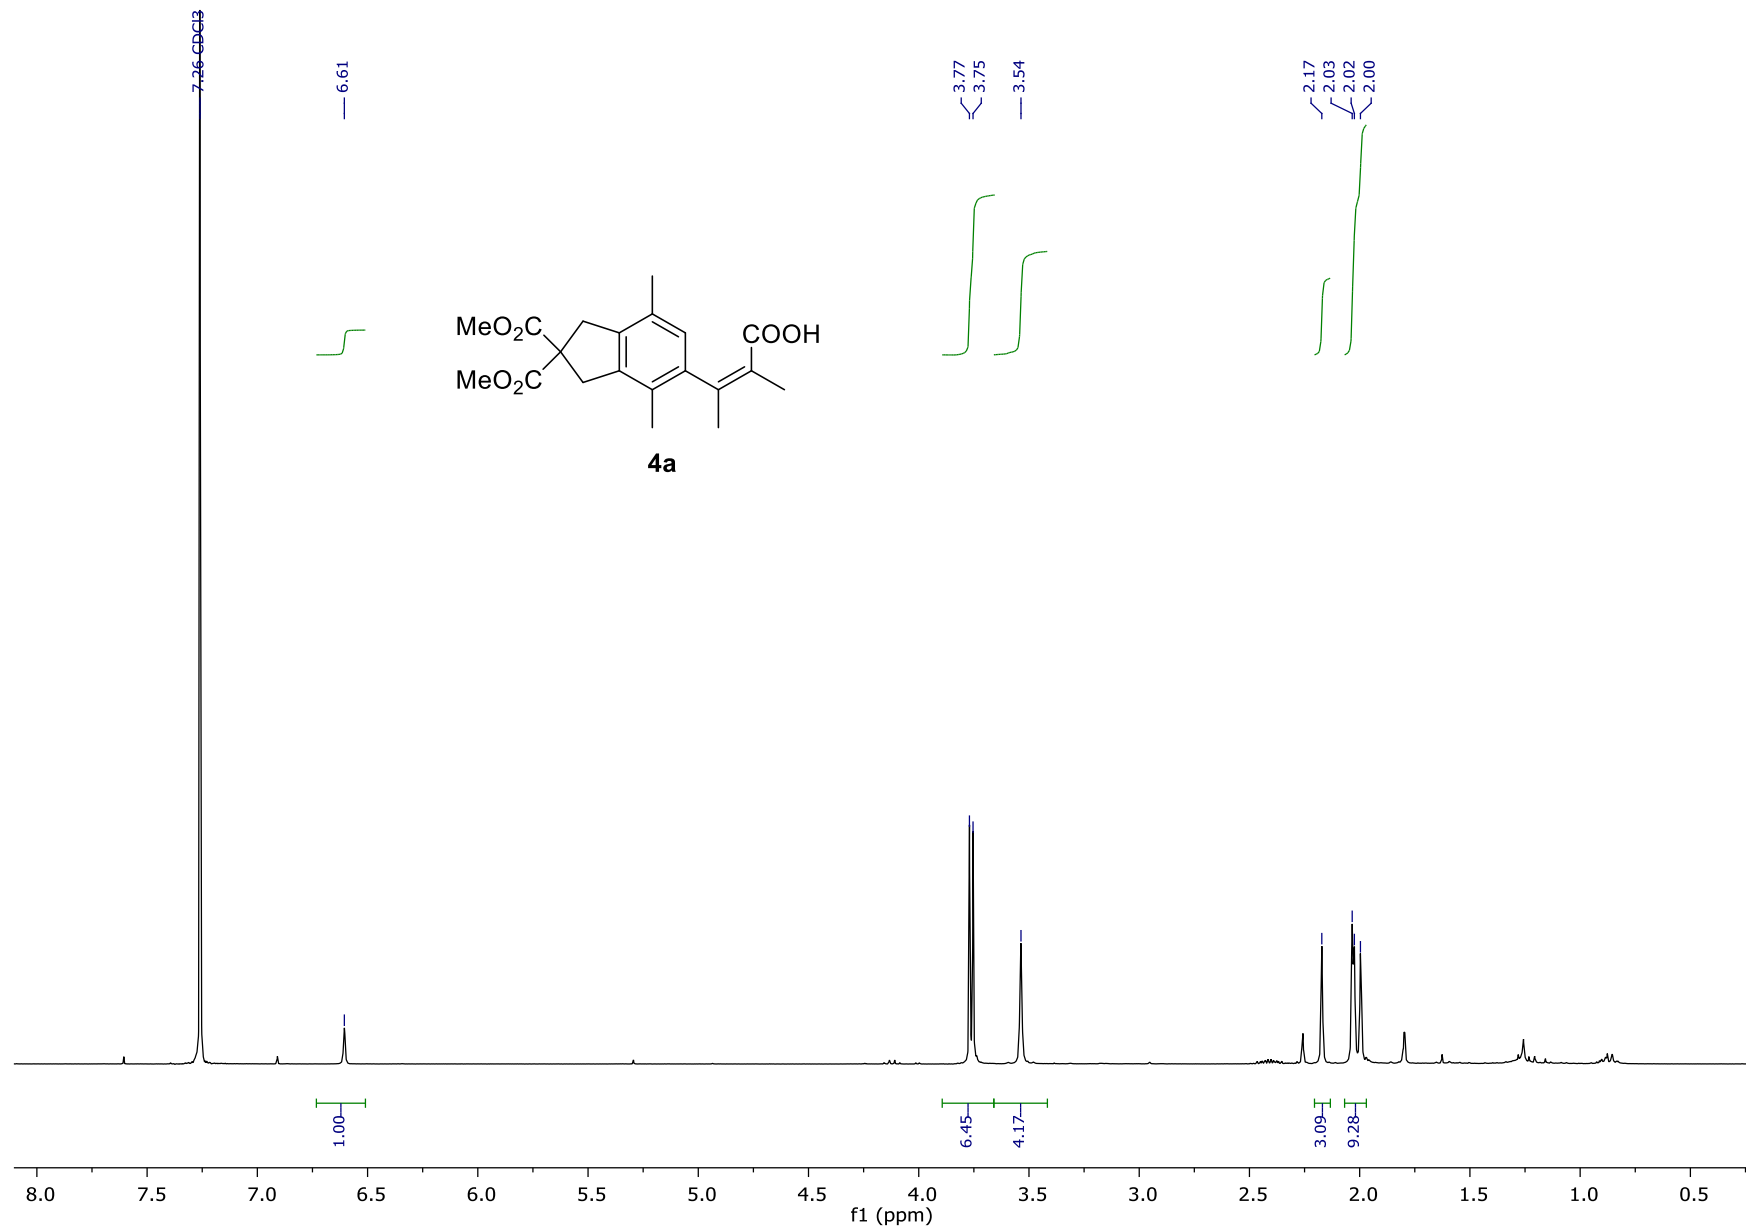

Figure S9. <sup>1</sup>H NMR (300 MHz, CDCl<sub>3</sub>) spectrum

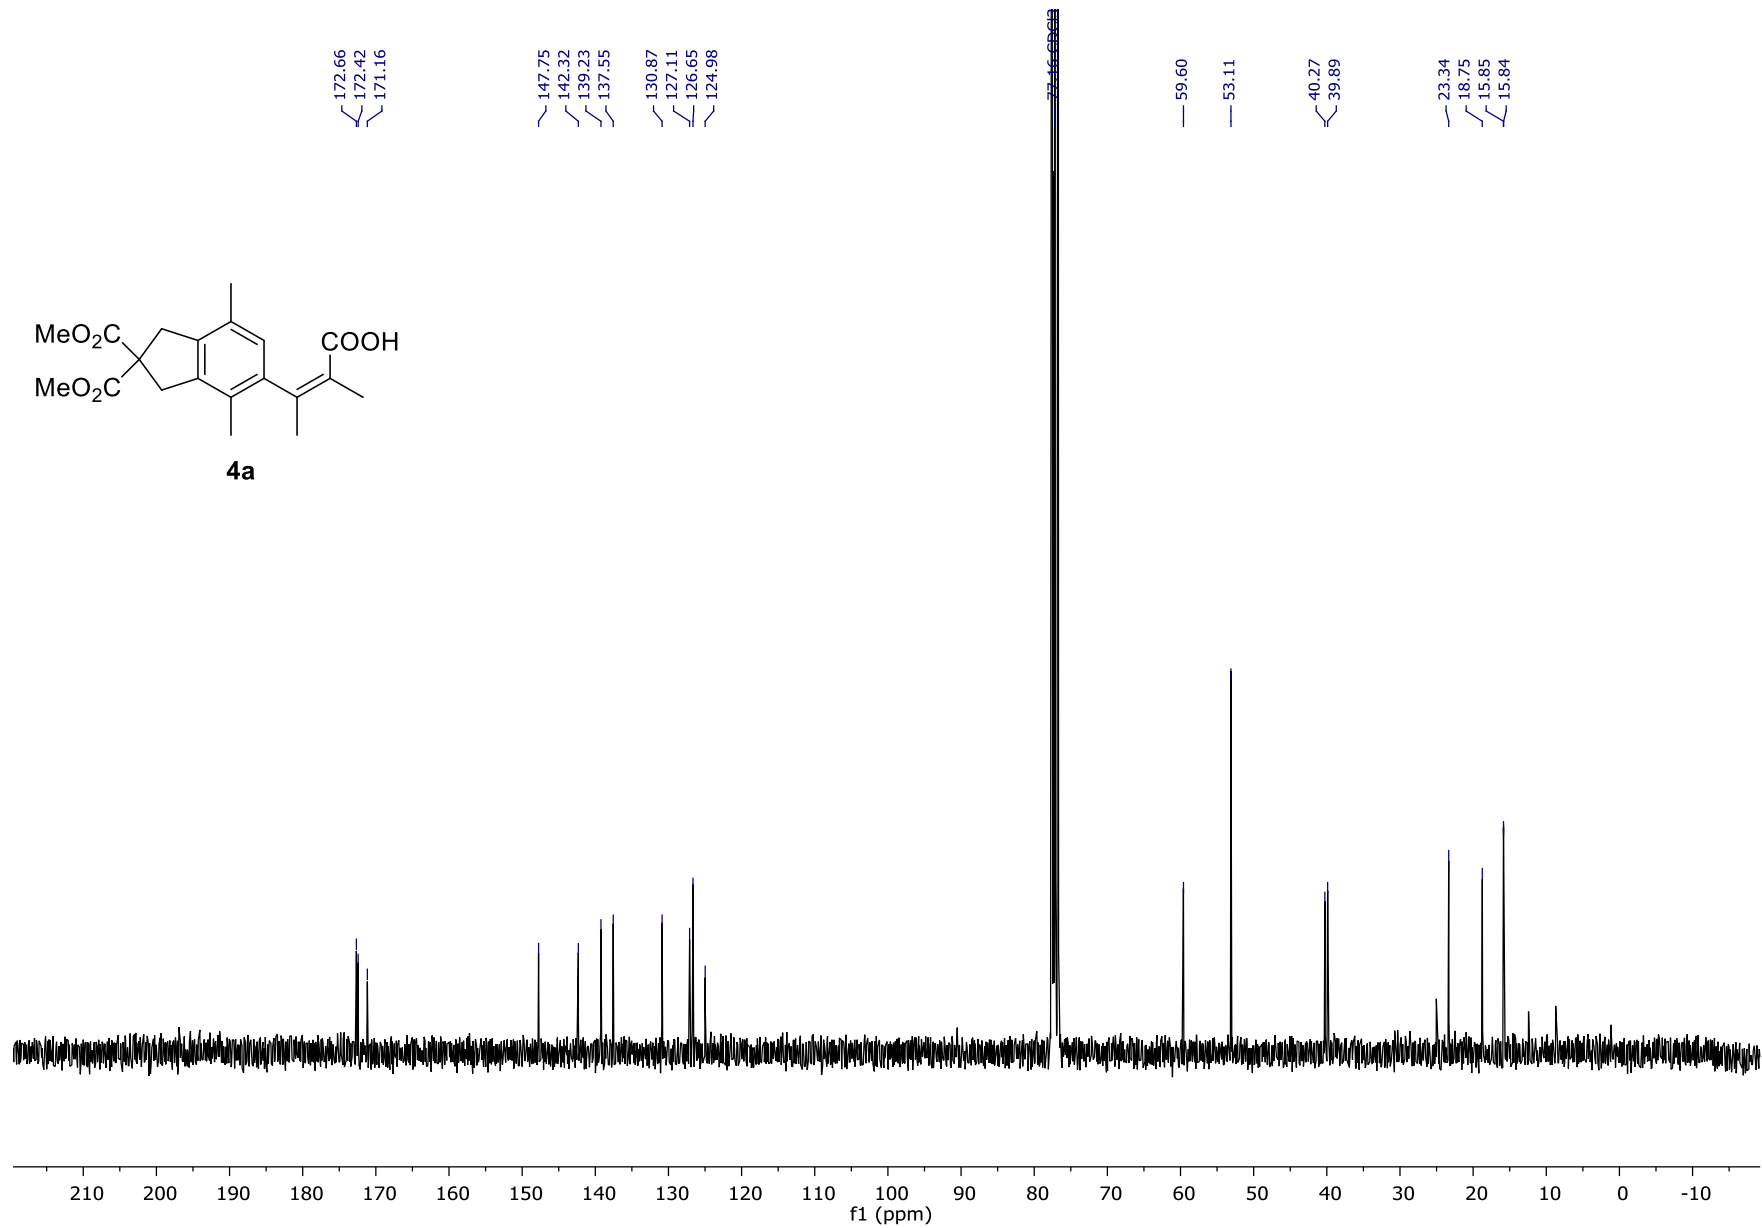

Figure S10.  $^{13}\text{C}$  NMR (75 MHz,  $\text{CDCl}_3$ ) spectrum

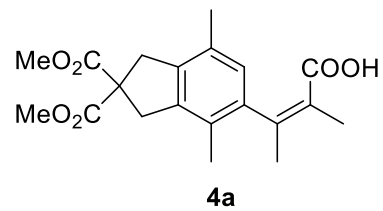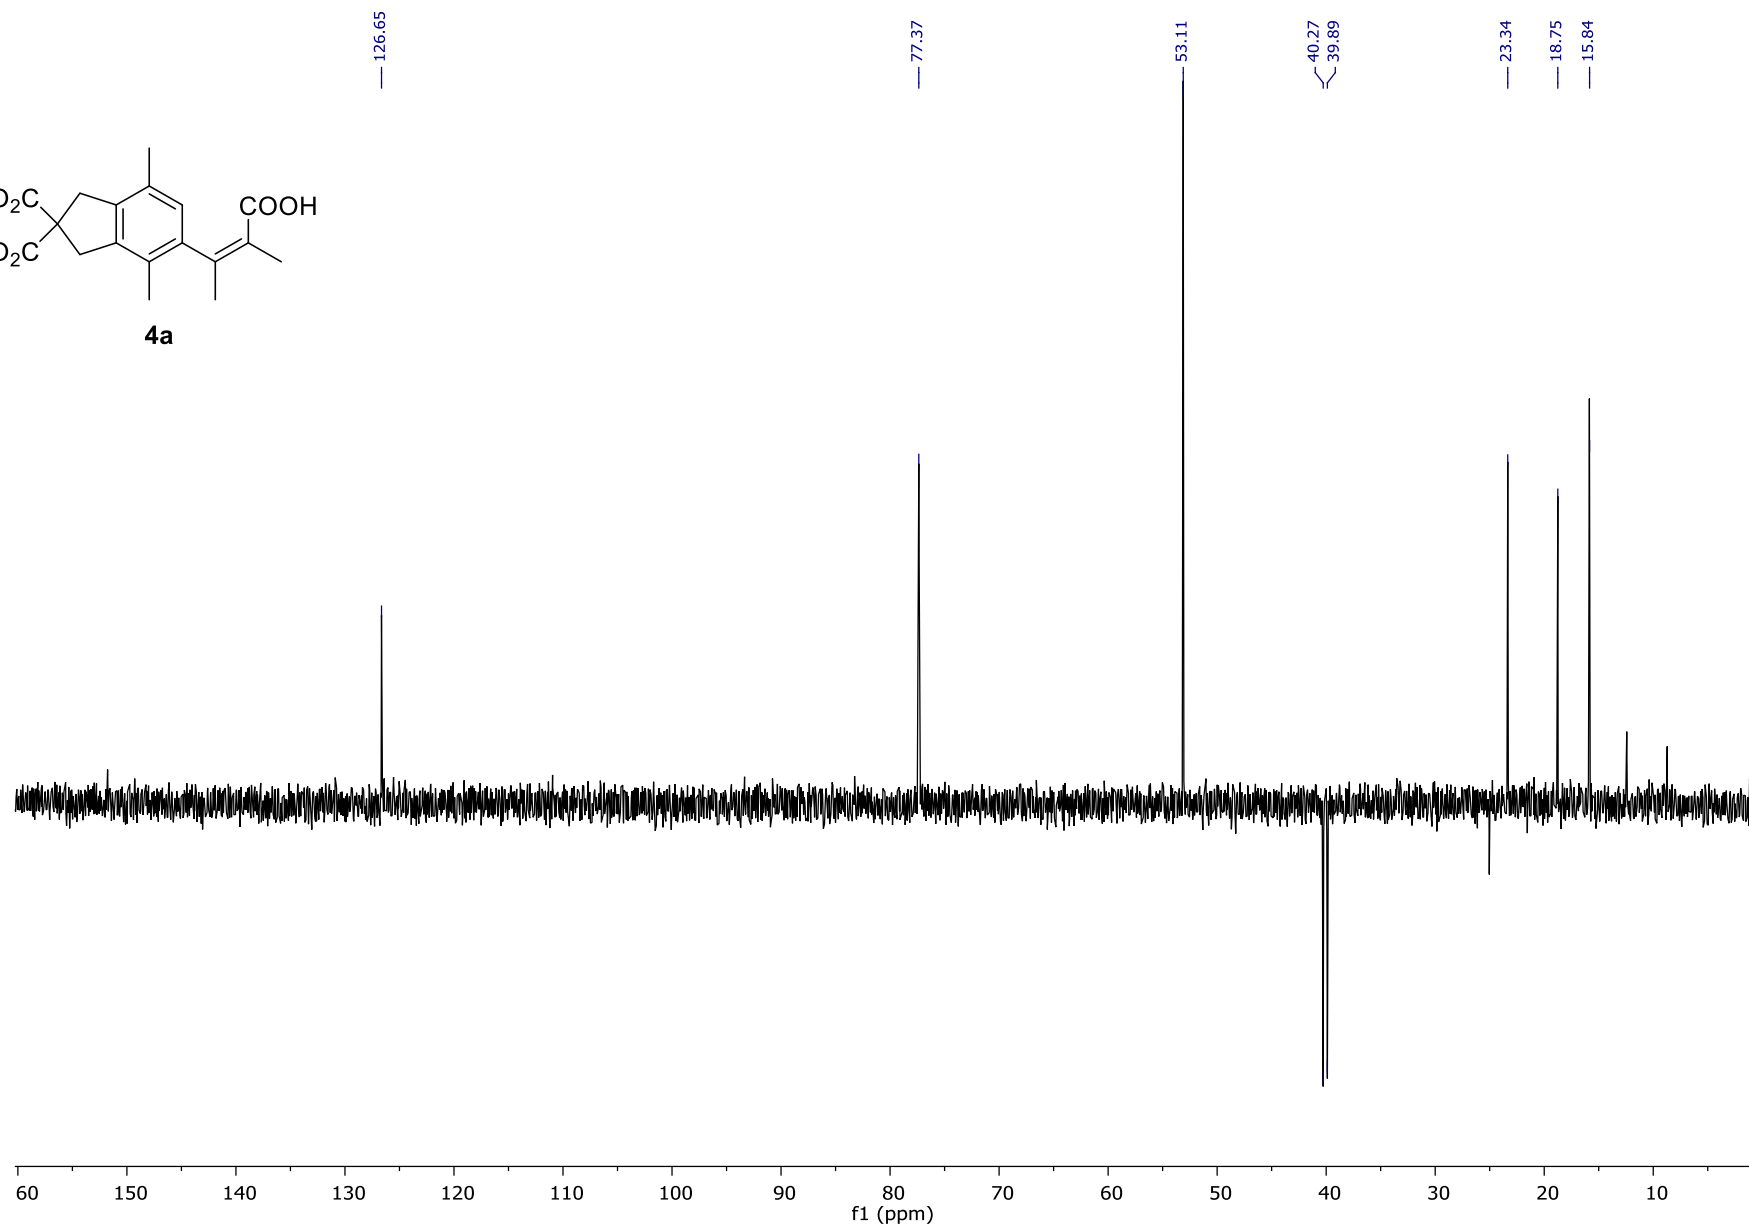

Figure S11. DEPT (75 MHz, CDCl<sub>3</sub>) spectrum

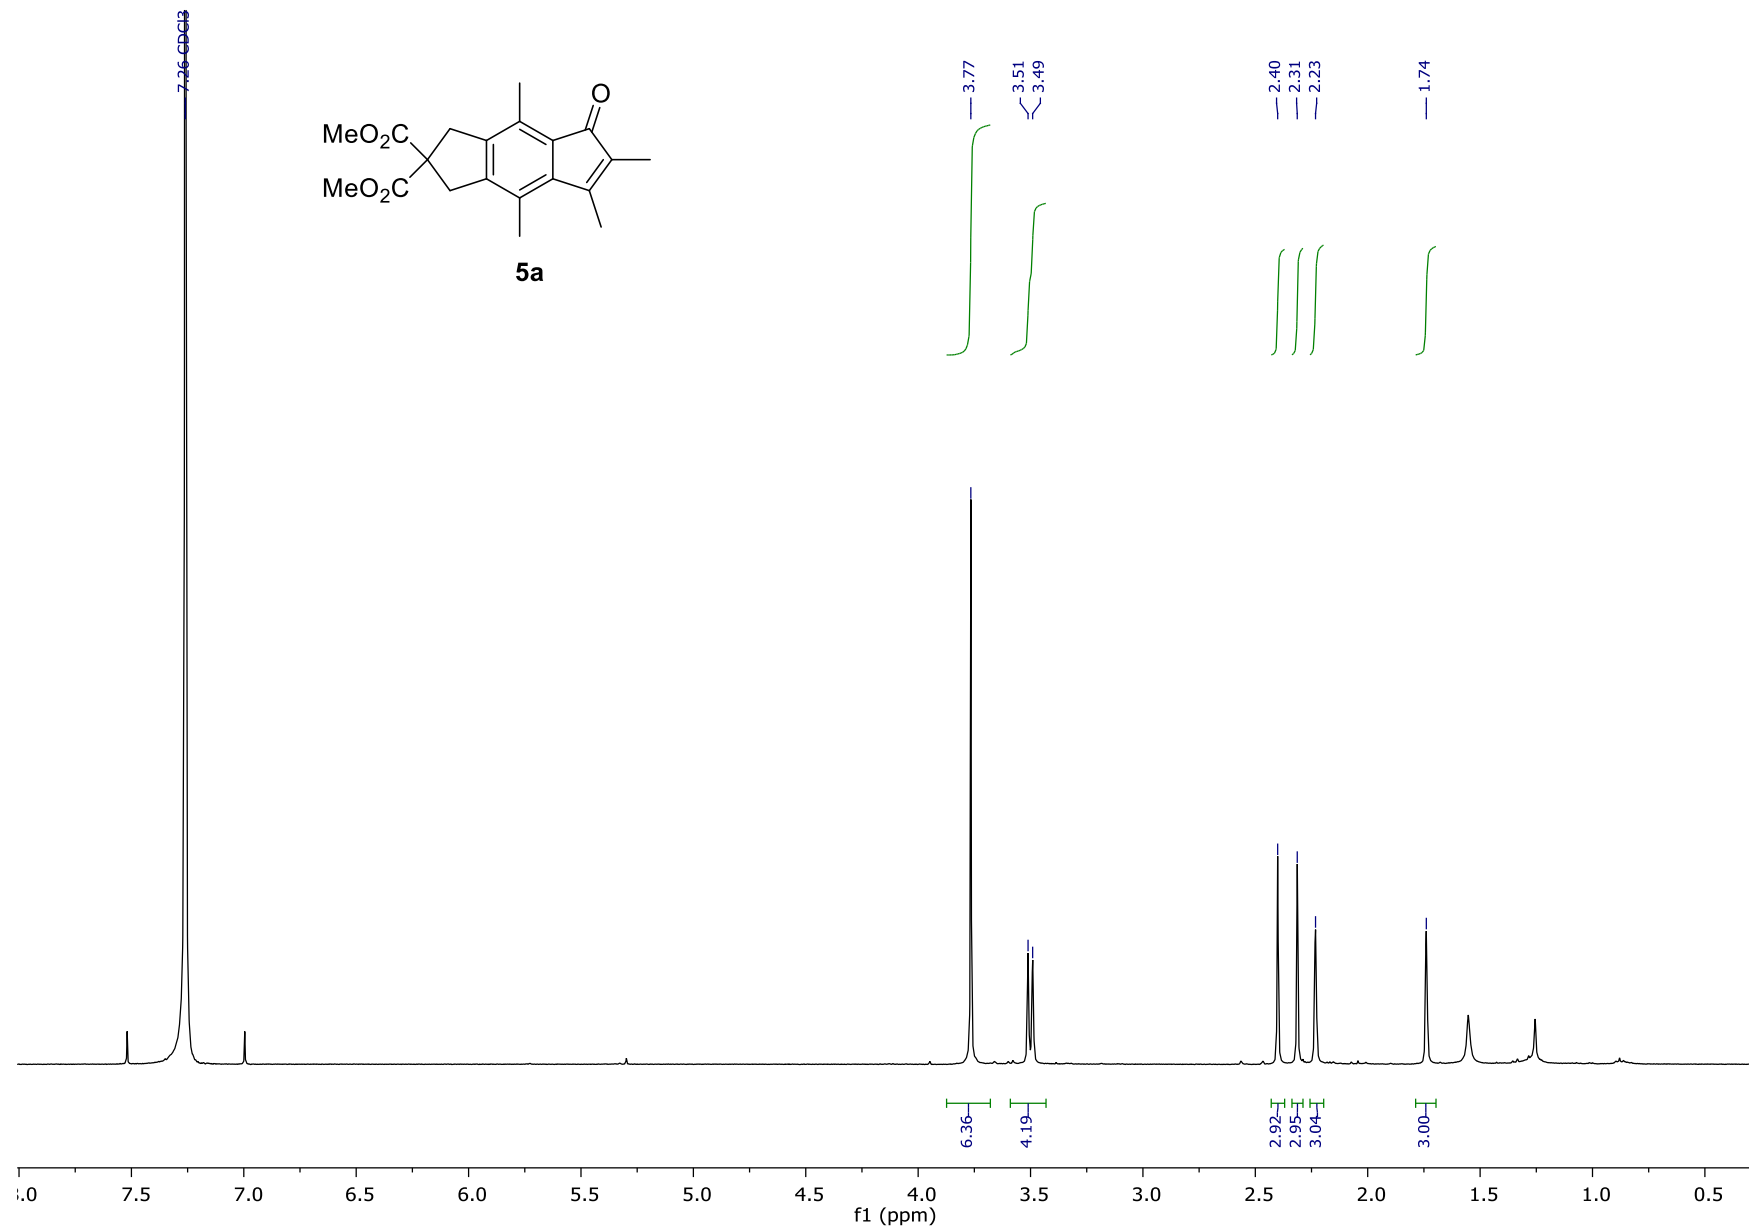

Figure S12. <sup>1</sup>H NMR (300 MHz, CDCl<sub>3</sub>) spectrum

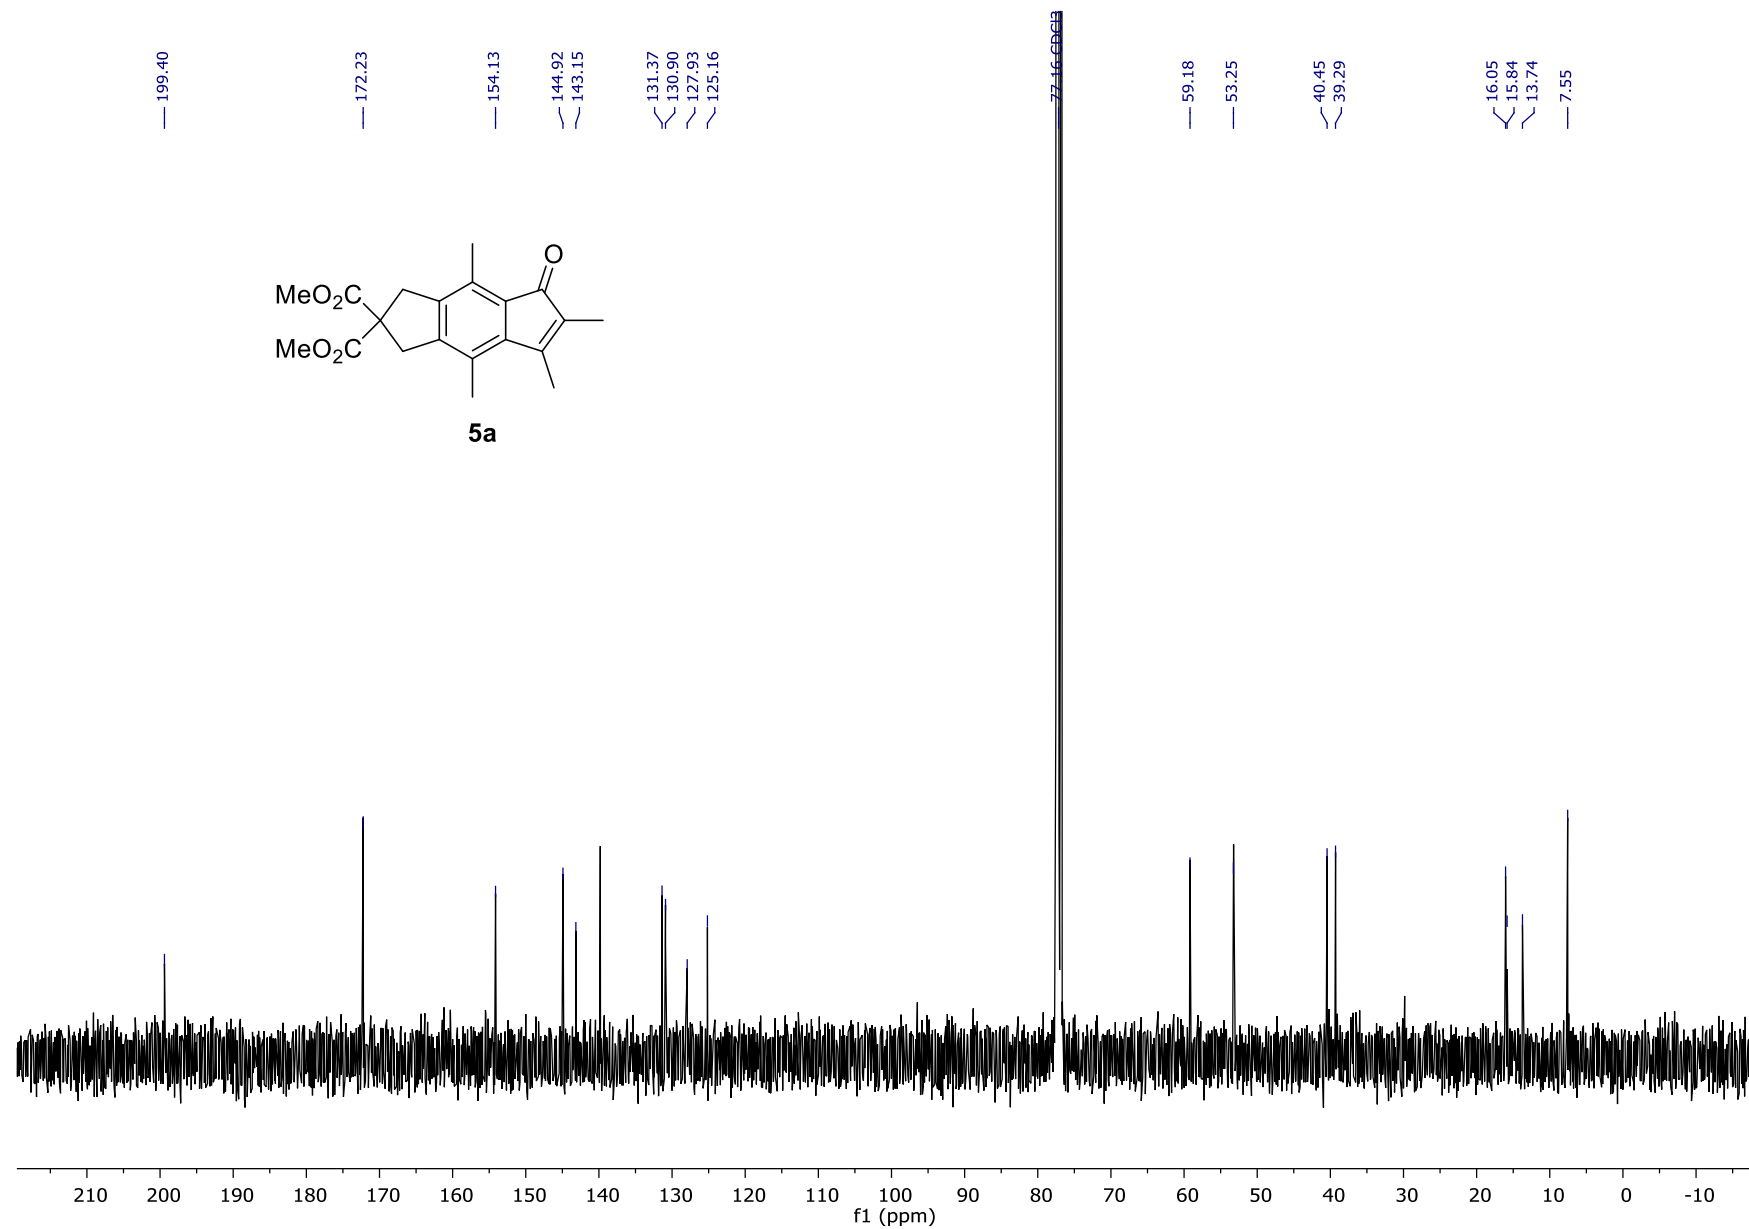

Figure S13. <sup>13</sup>C (75 MHz, CDCl<sub>3</sub>) spectrum

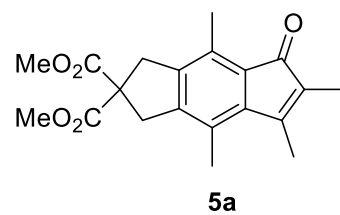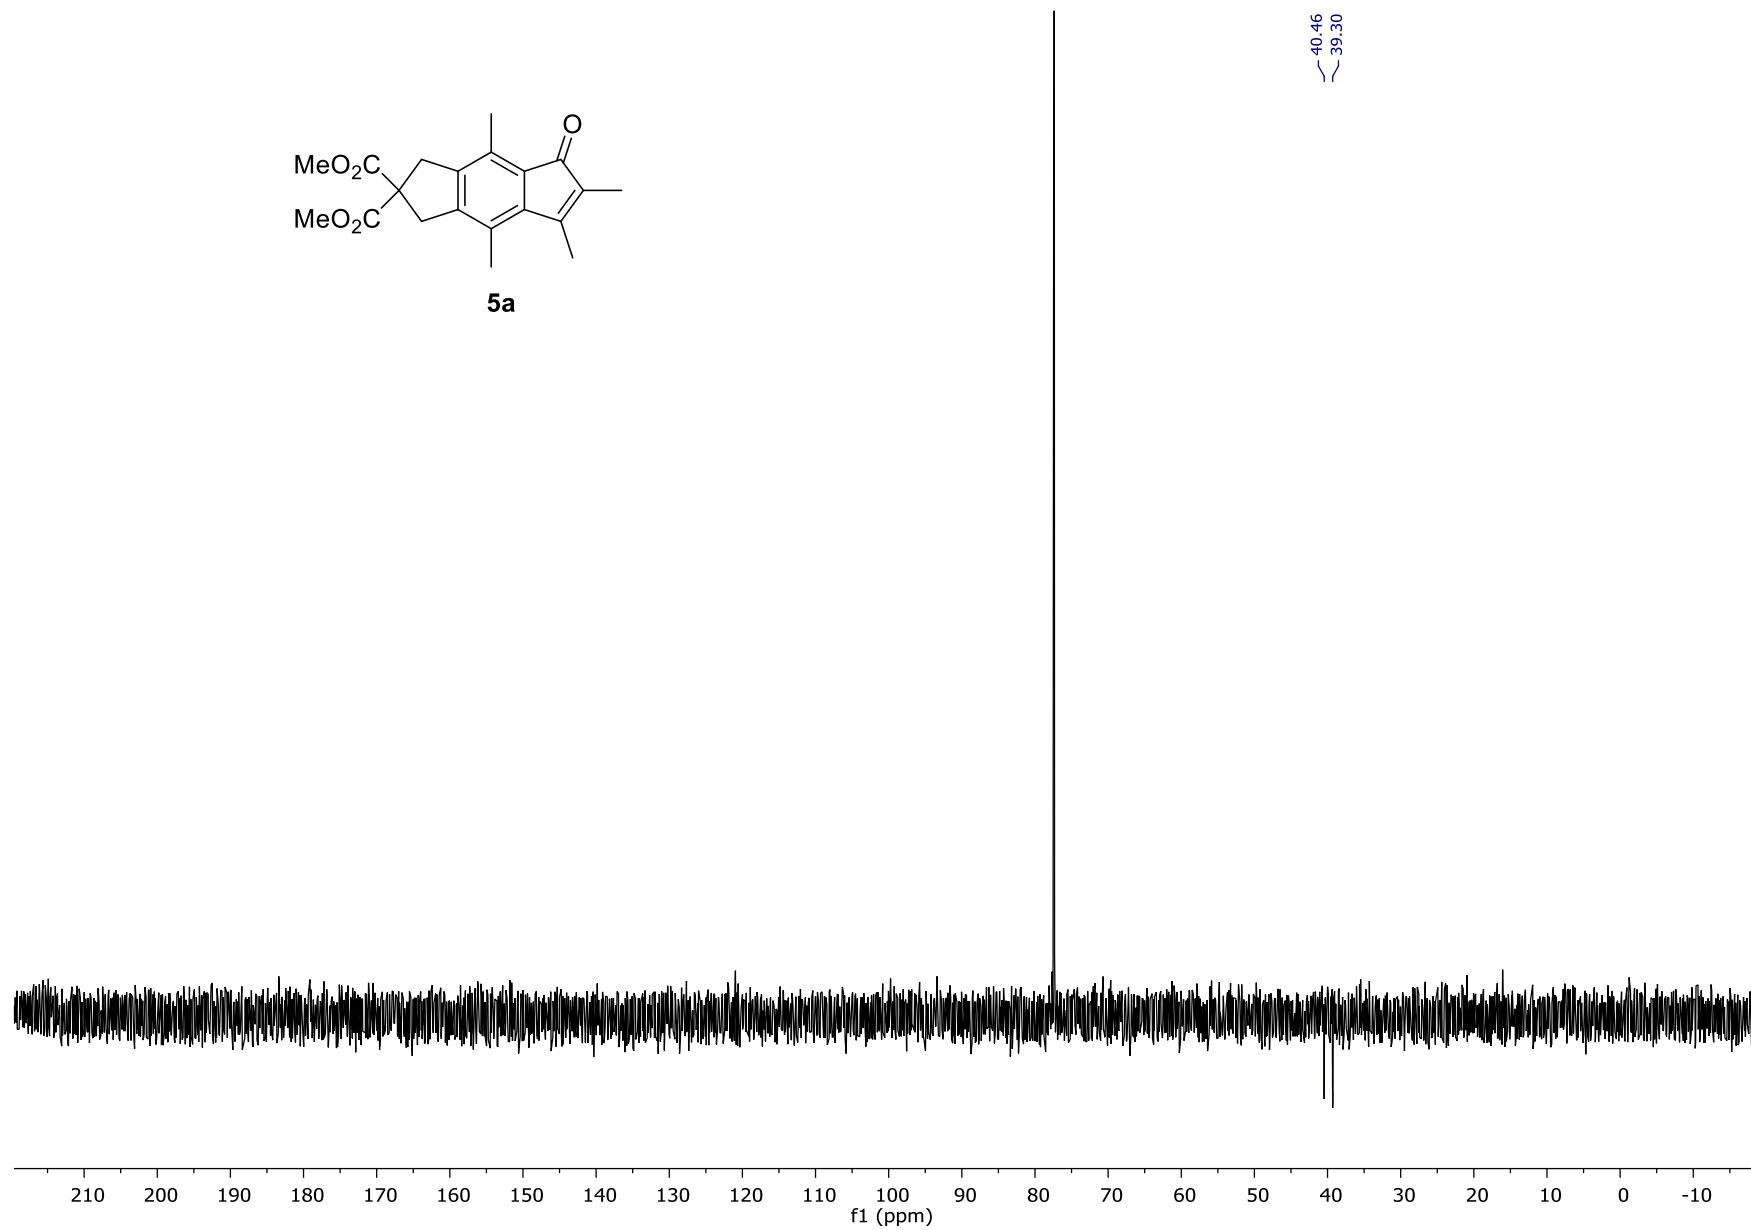

Figure S14. DEPT (75 MHz, CDCl<sub>3</sub>) spectrum

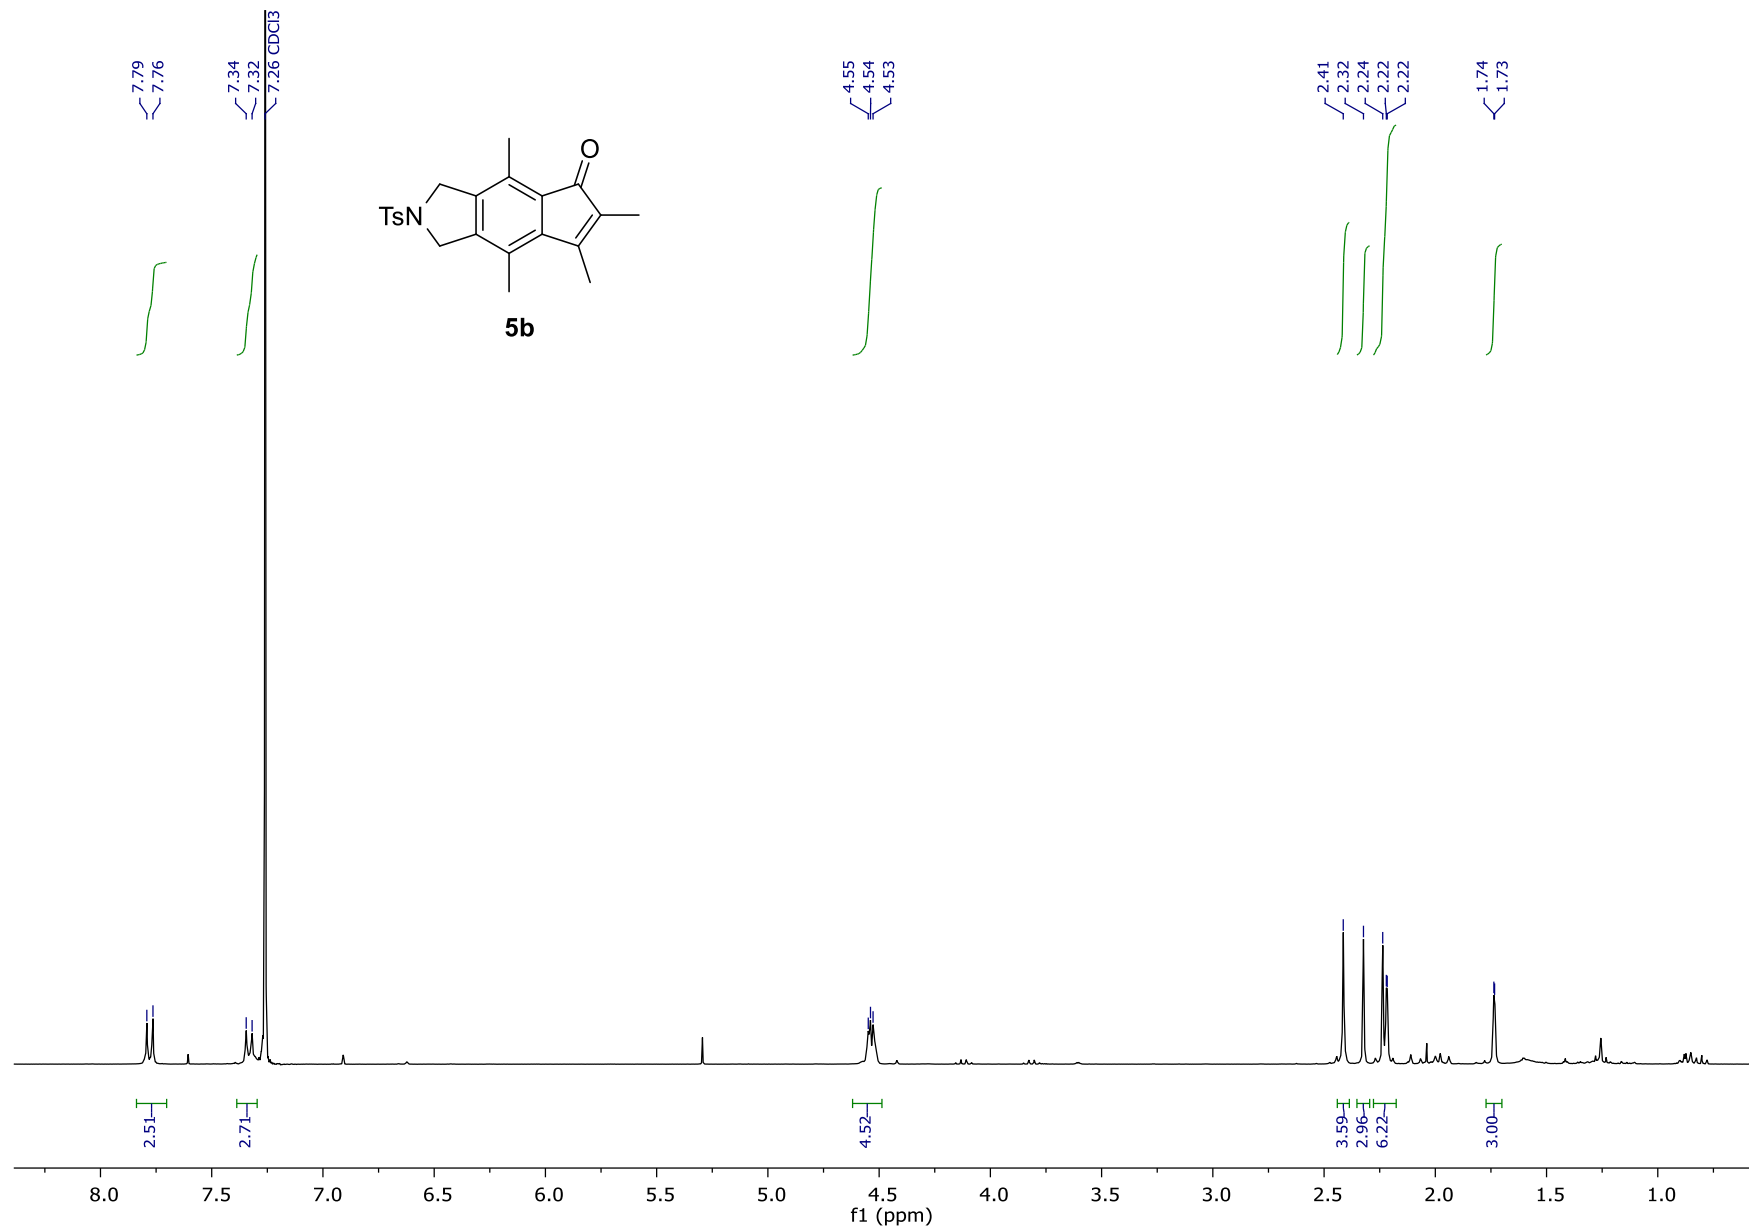

Figure S15. <sup>1</sup>H NMR (300 MHz, CDCl<sub>3</sub>) spectrum



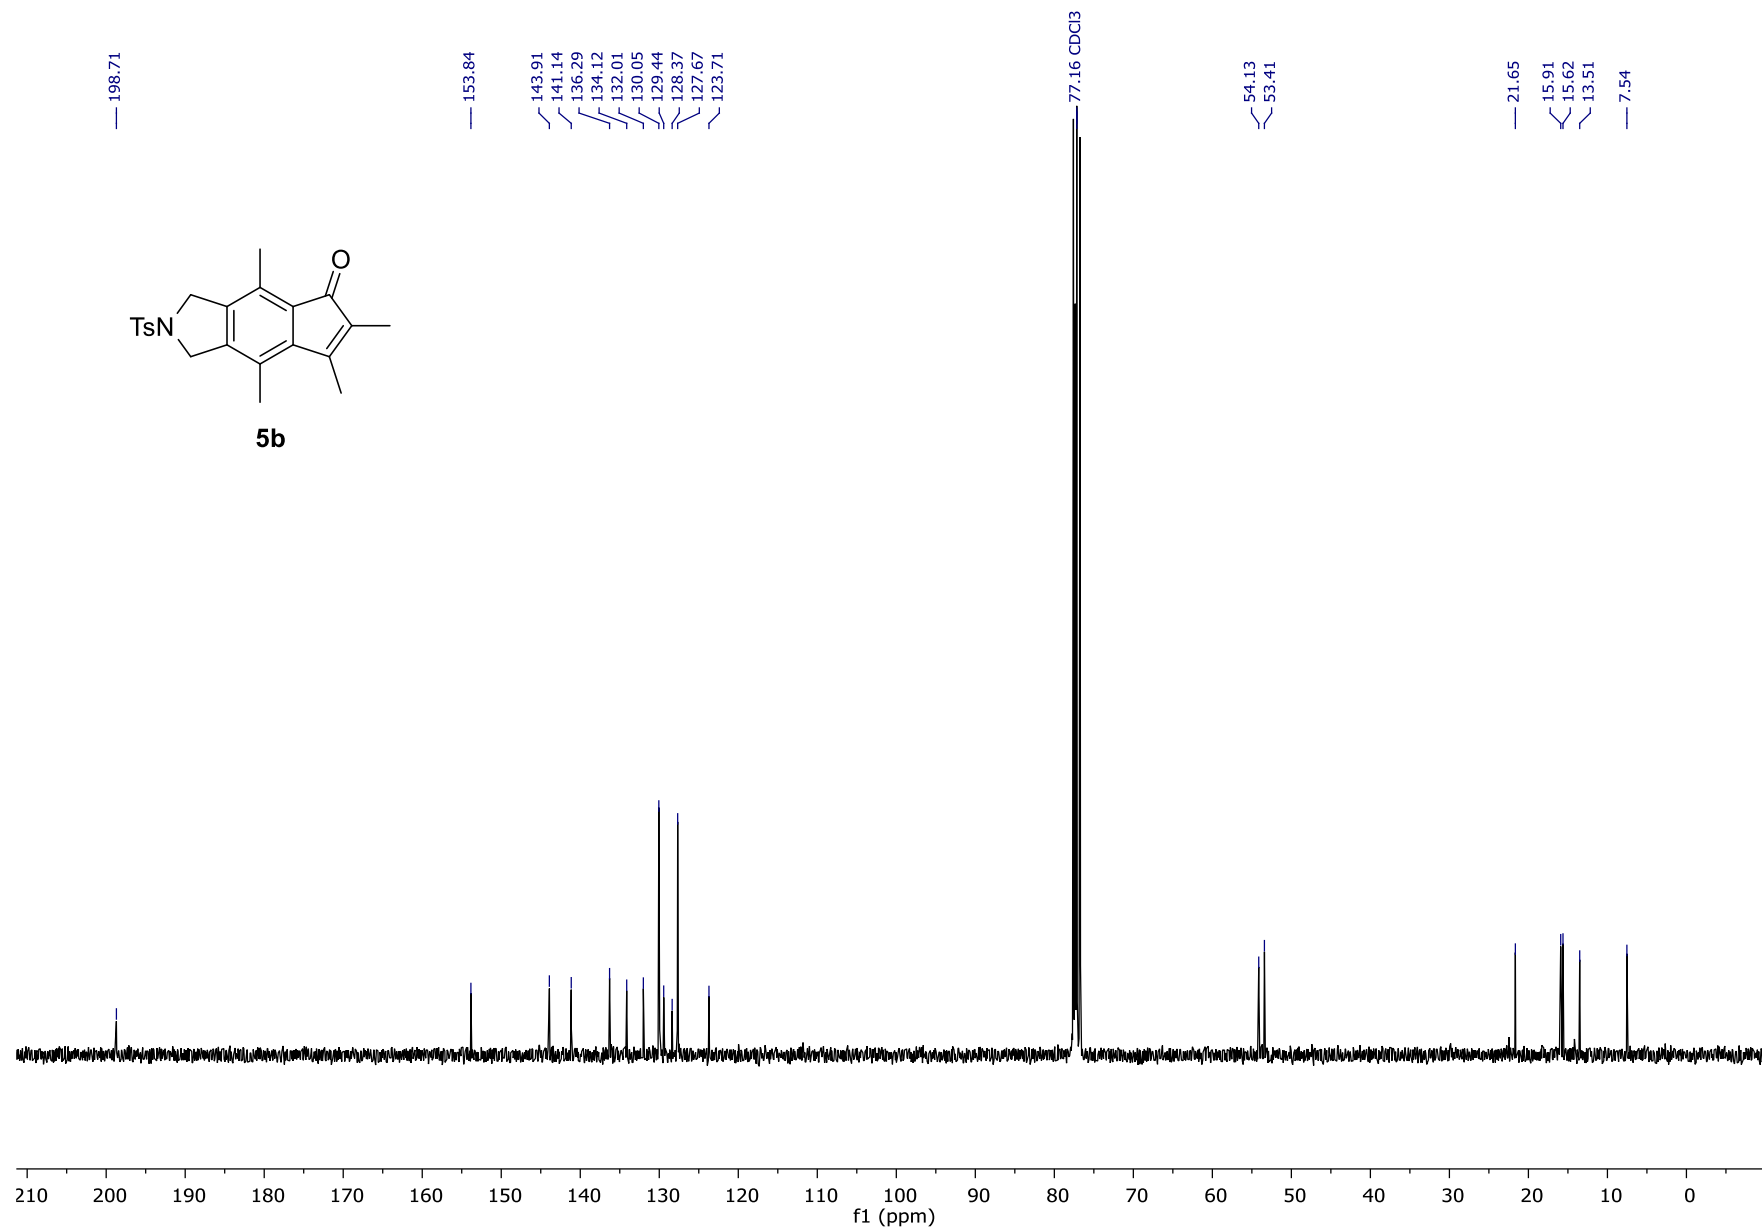

Figure S16.  $^{13}\text{C}$  NMR (75 MHz,  $\text{CDCl}_3$ ) spectrum

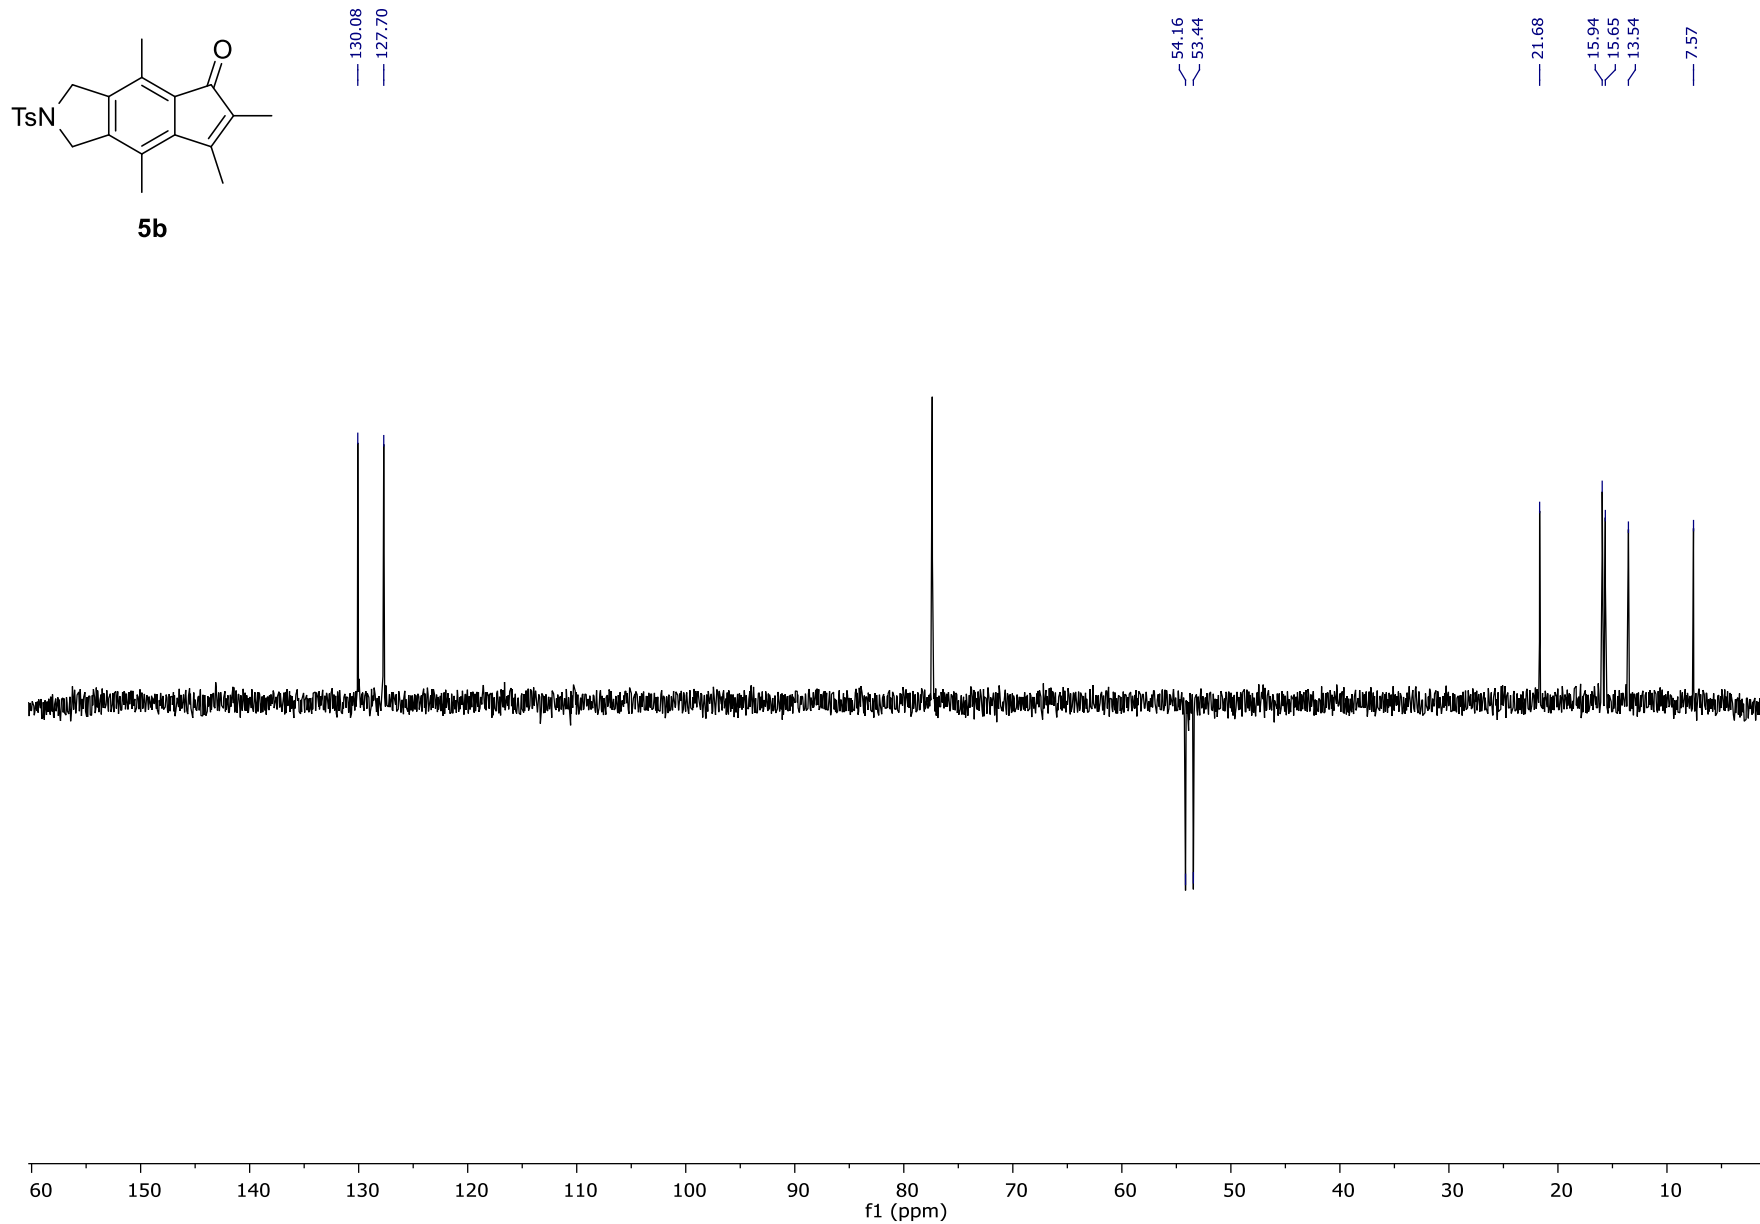

Figure S17. DEPT (75 MHz, CDCl<sub>3</sub>) spectrum

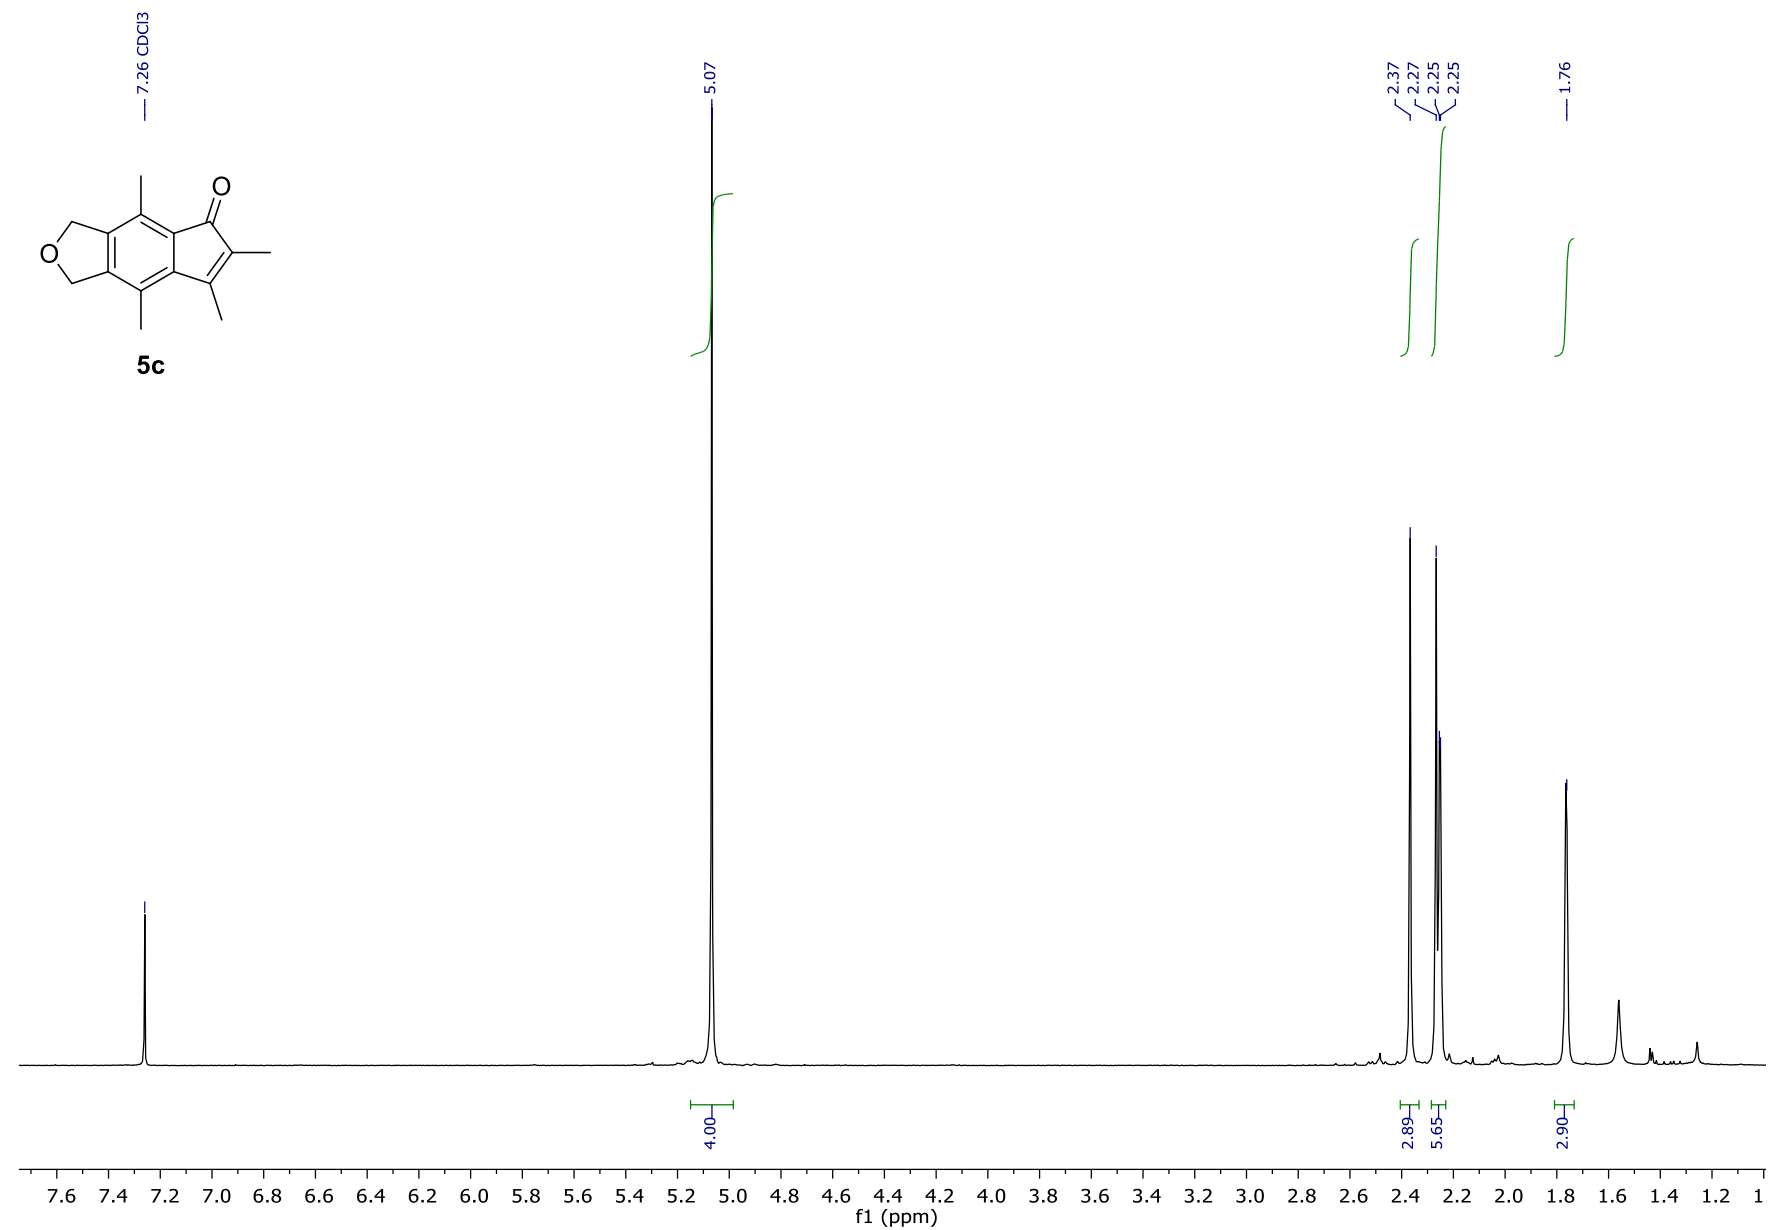

Figure S18. <sup>1</sup>H NMR (300 MHz, CDCl<sub>3</sub>) spectrum

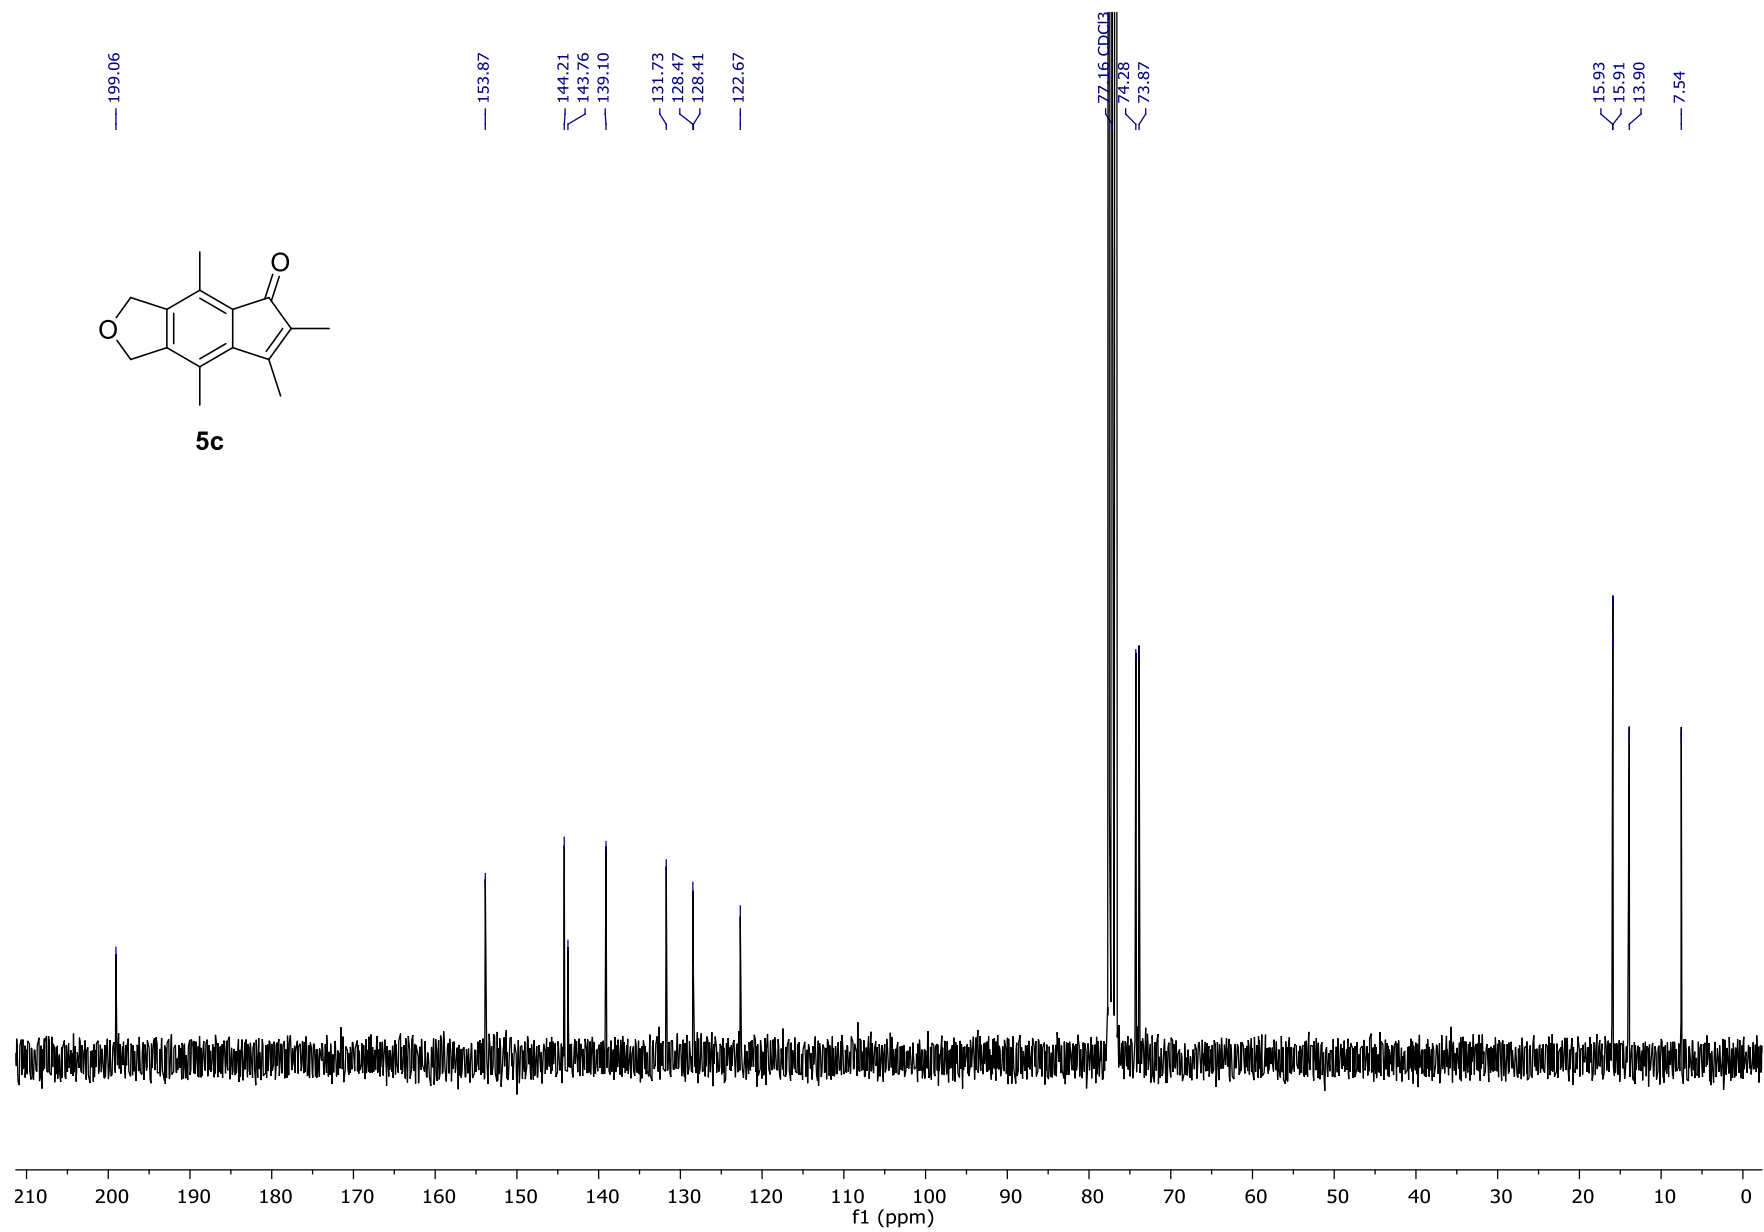

Figure S19. <sup>13</sup>C NMR (75 MHz, CDCl<sub>3</sub>) spectrum

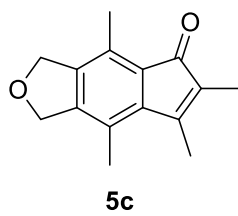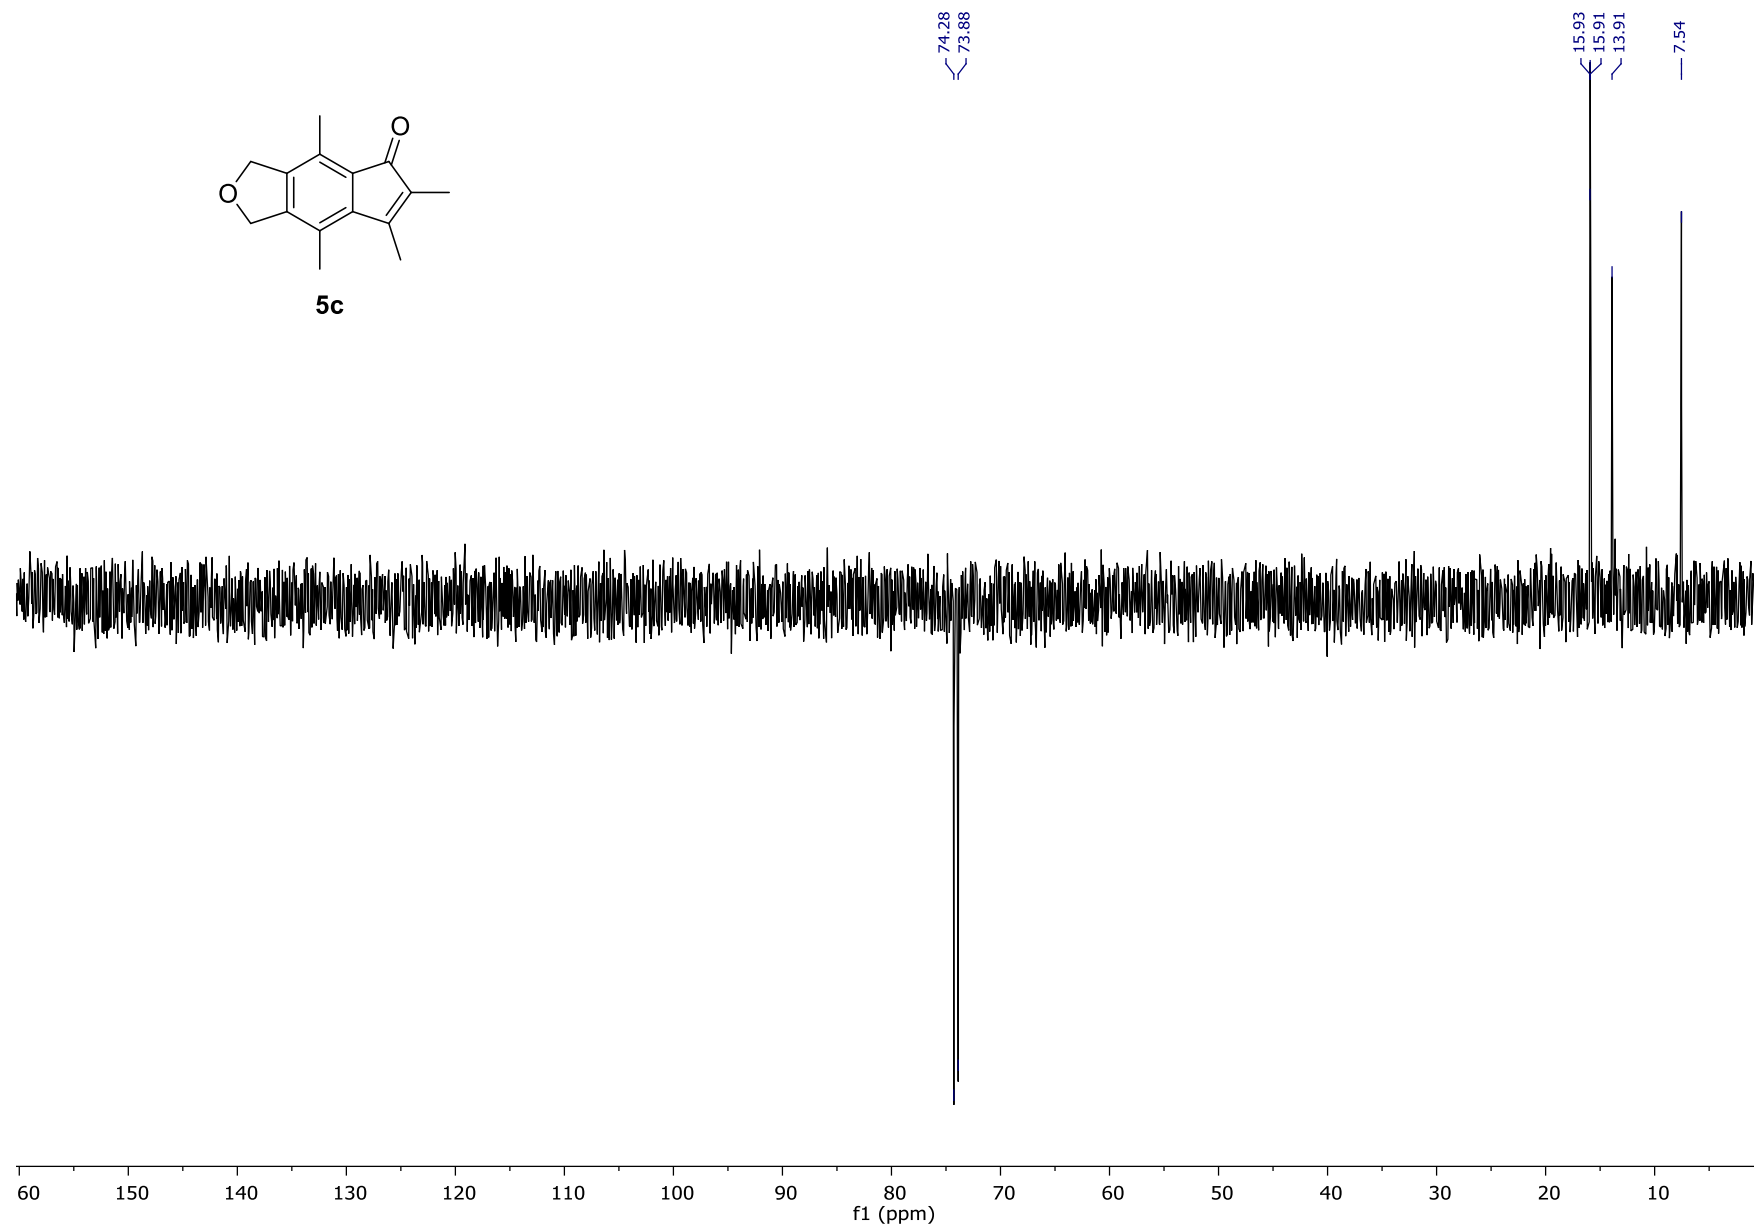

**Figure S120. DEPT (75 MHz, CDCl<sub>3</sub>) spectrum**

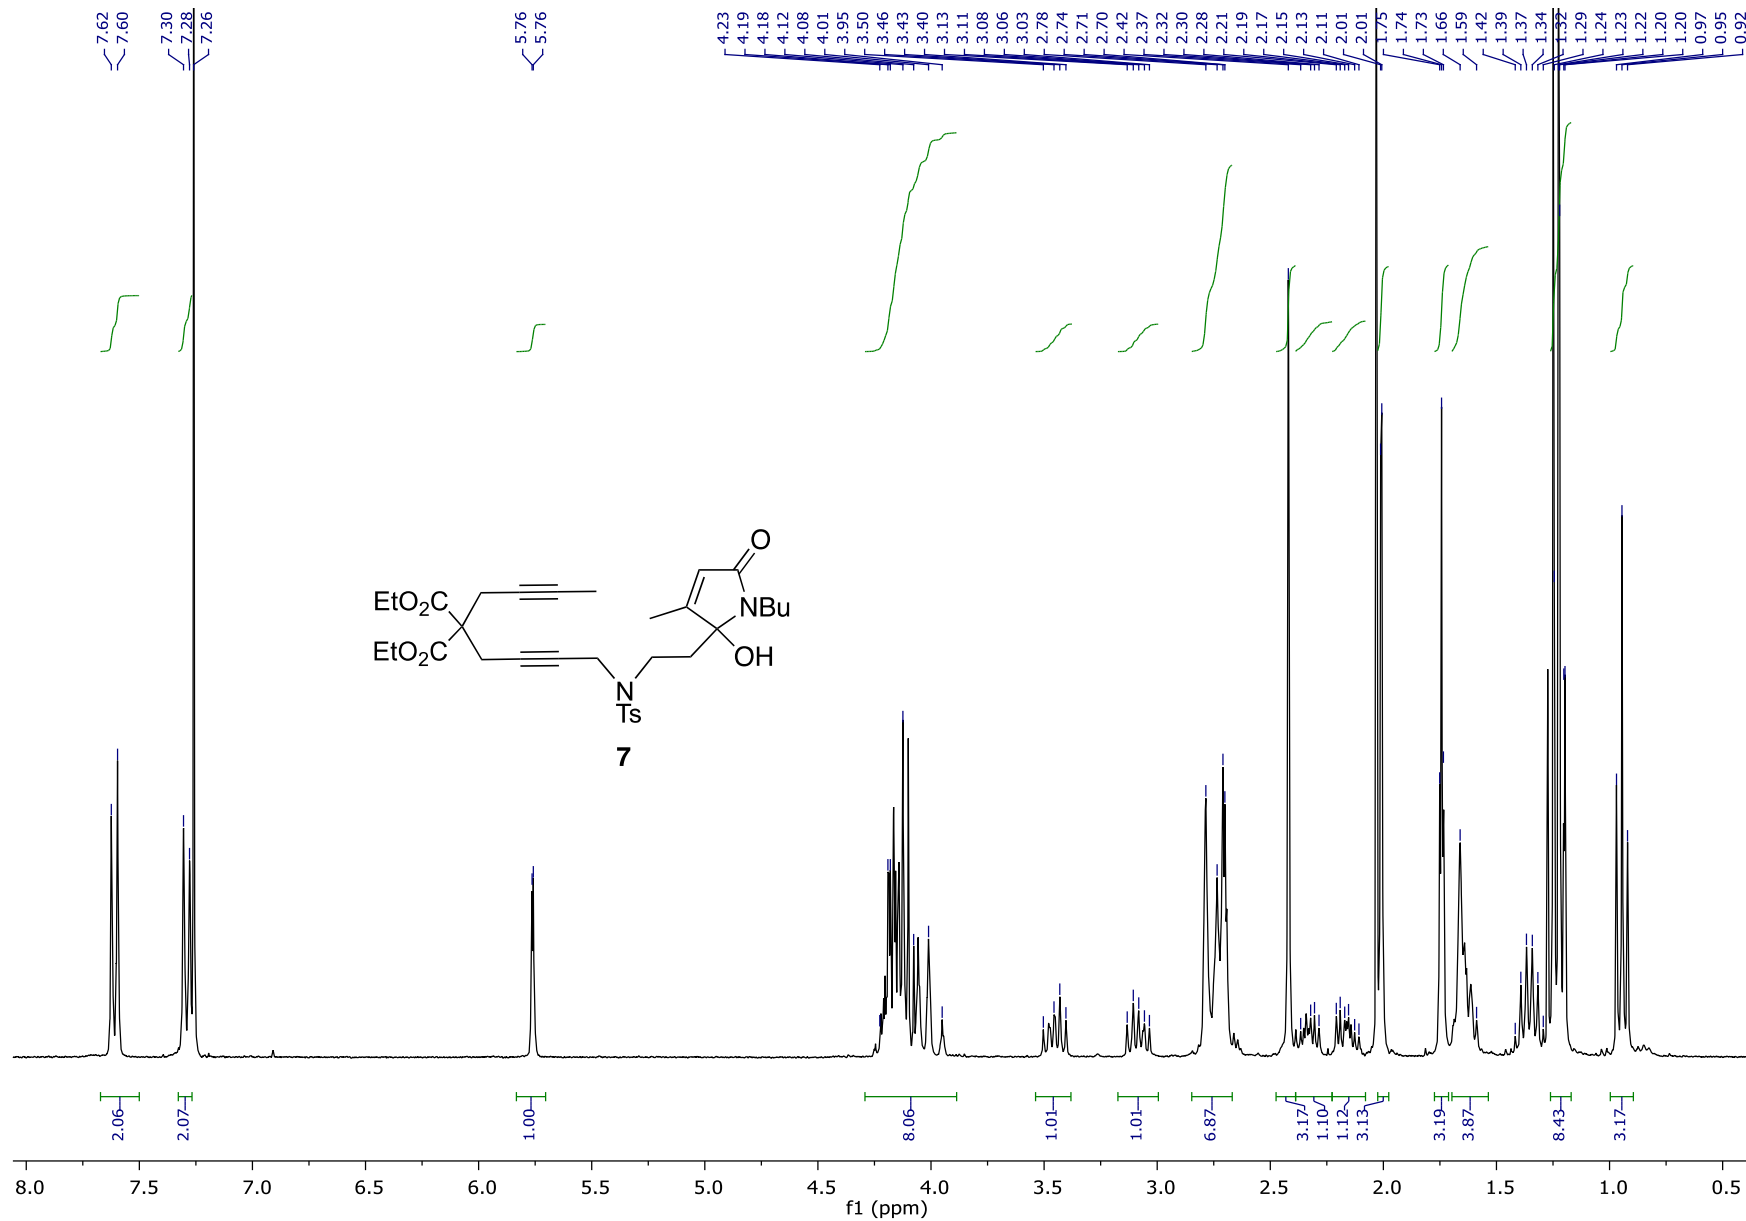

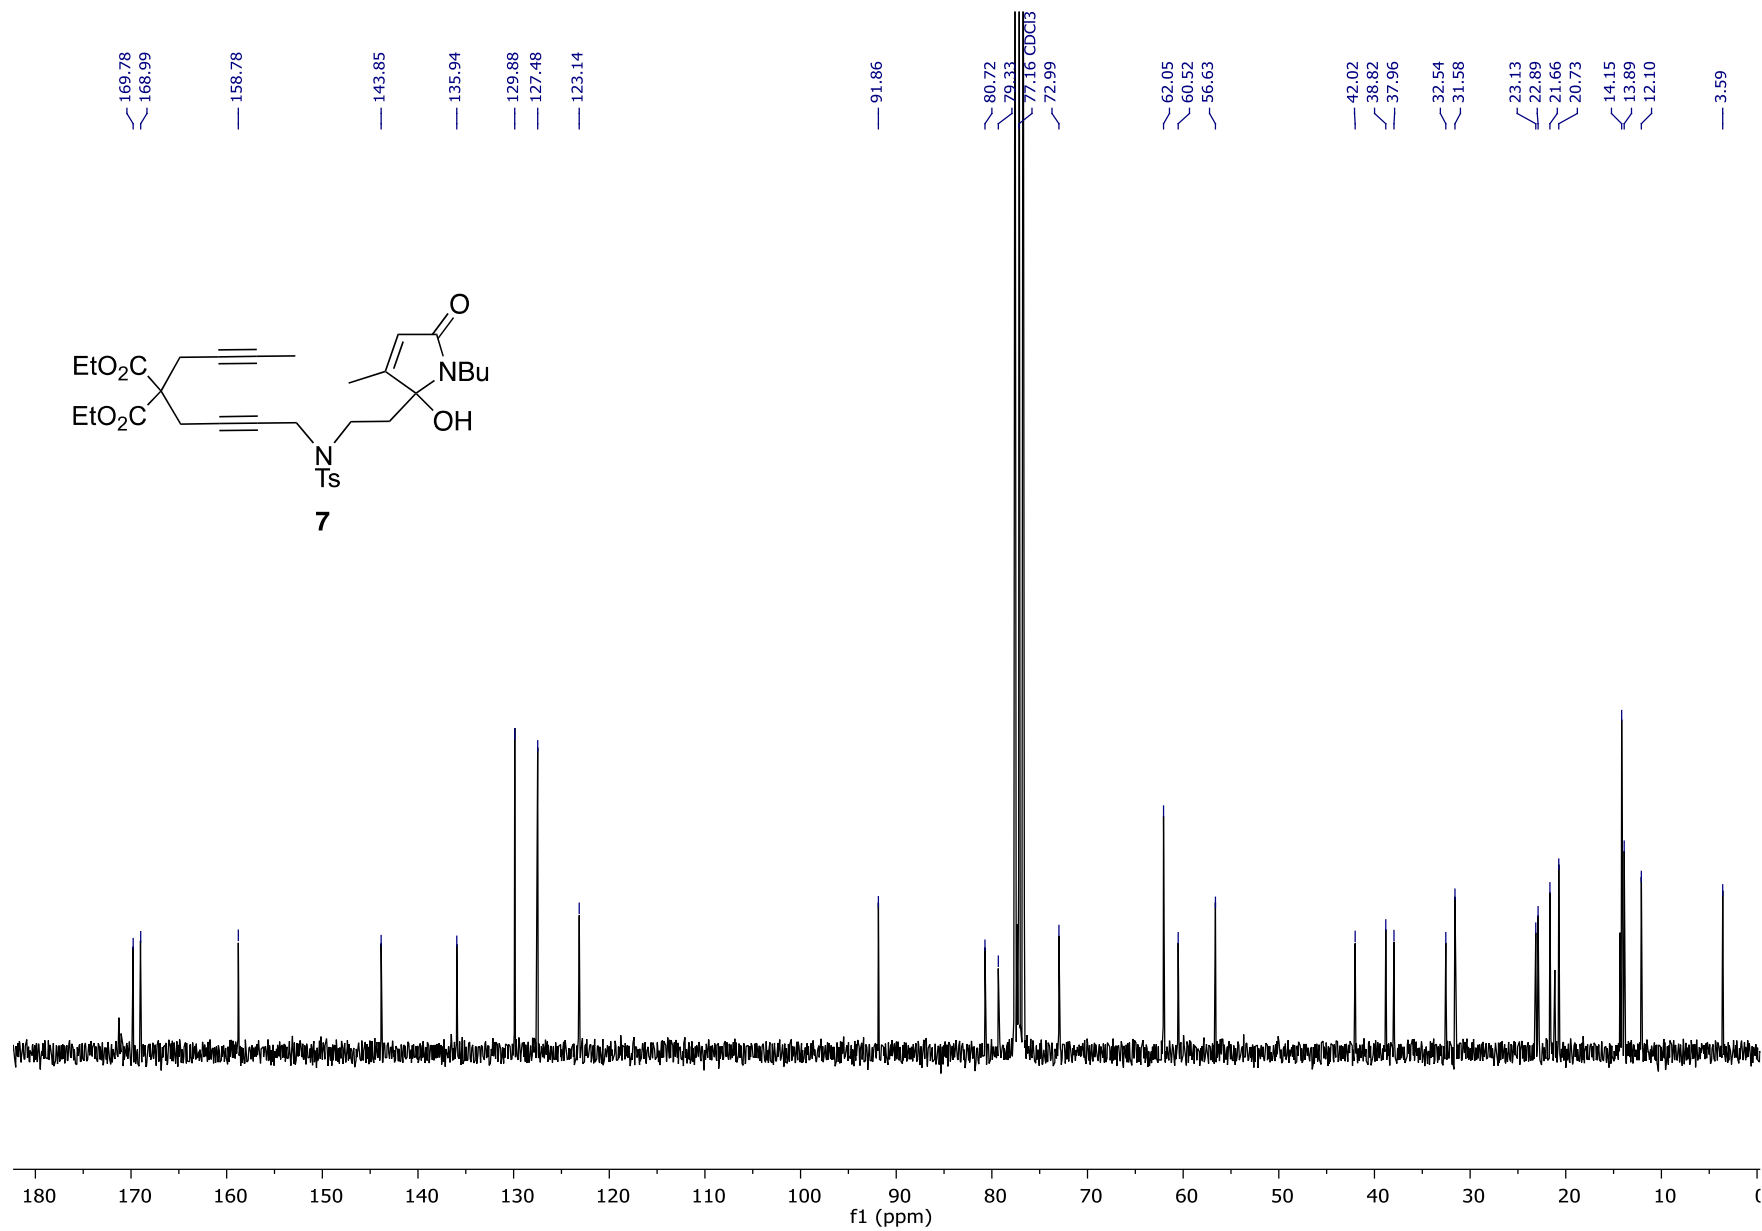

Figure S22. <sup>13</sup>C NMR (75 MHz, CDCl<sub>3</sub>) spectrum

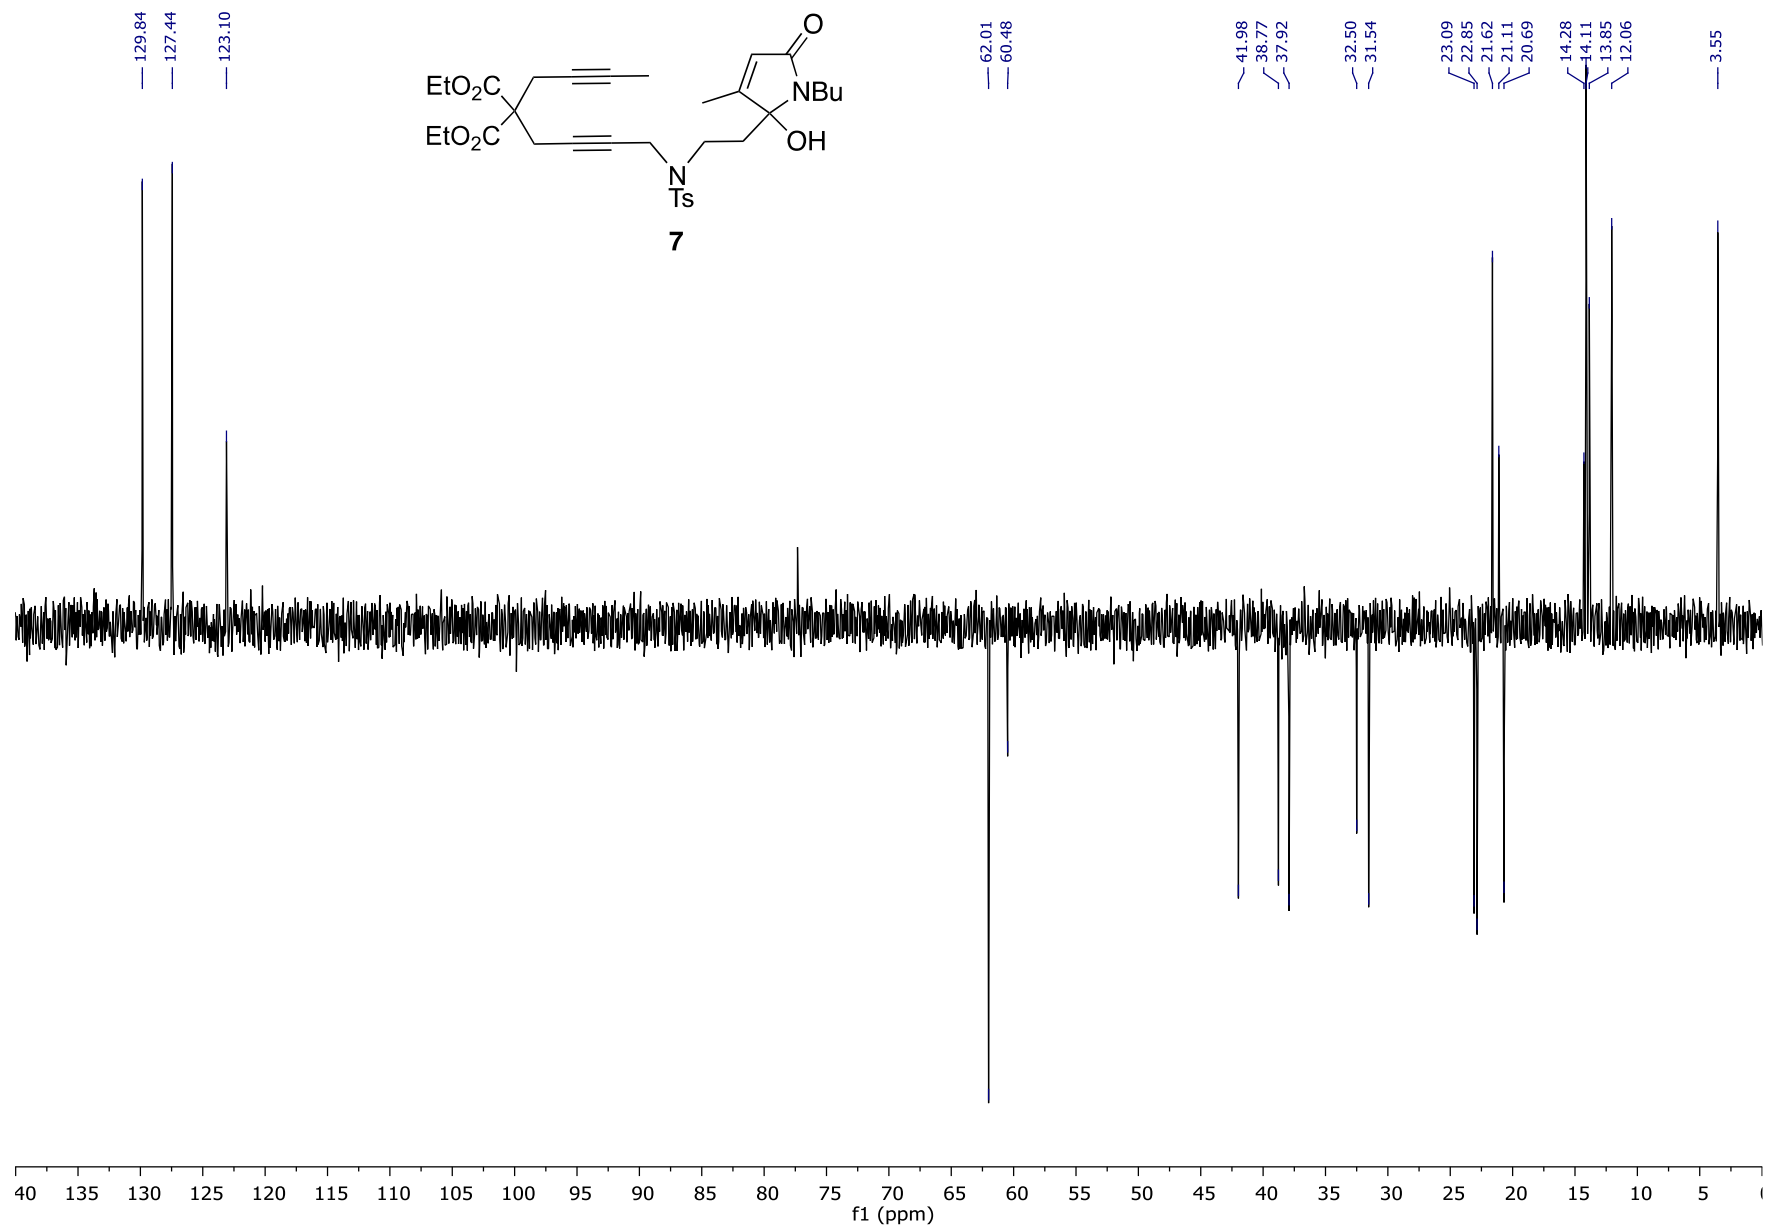

Figure S23. DEPT (75 MHz, CDCl<sub>3</sub>) spectrum



## Assignment of (Z)-8

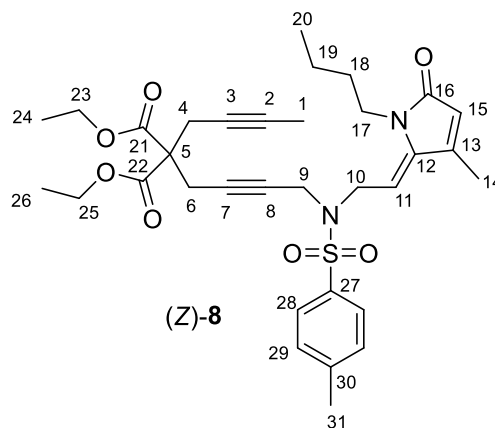

$^1\text{H}$  NMR (300 MHz, Chloroform-*d*)  $\delta$  0.91 (t,  $J$  = 7.3 Hz, 3H, H20), 1.21 (t,  $J$  = 7.1 Hz, 6H, H24 and H26), 1.25 – 1.37 (m, 2H, H19), 1.45-1.56 (m, 2H, H18), 1.72 (br t,  $J$  = 2.4 Hz, 3H, H1), 1.97 (br d,  $J$  = 1.5 Hz, 3H, H14), 2.43 (s, 3H, H31), 2.67 (br q,  $J$  = 2.4 Hz, 2H, H4), 2.73 (br t,  $J$  = 2.1 Hz, 2H, H6), 3.69 (dd,  $J$  = 7.3 Hz, 2H, H17), 4.08 – 4.26 (m, 8H, H9, H10, 23 and H25), 4.98 (t,  $J$  = 7.0 Hz, 1H, H11), 5.85 (br q,  $J$  = 1.5 Hz, 1H, H15), 7.32 (d,  $J$  = 7.9 Hz, 2H, HAr), 7.70 (d,  $J$  = 7.9 Hz, 2H, HAr).

$^{13}\text{C}$  NMR (75 MHz,  $\text{CDCl}_3$ )  $\delta$  3.6 (C1), 12.4 (C14), 13.9 (C20), 14.1 (2C, C24 and C26), 20.0 (C19), 21.7 (C31), 22.8 (C6), 23.0 (C4), 32.0 (C18), 37.3 (C9), 40.7 (C17), 43.4 (C10), 56.6 (C5), 62.0 (2C, C23 or C25), 73.0 (C2 or C3 or C7 or C8), 76.0 (C2 or C3 or C7 or C8), 79.2 (C2 or C3 or C7 or C8), 81.3 (C2 or C3 or C7 or C8), 104.8 (C11), 120.5 (C15), 127.8 (2C, C28 or C29), 129.8 (2C, C28 or C29), 136.0 (C12 or C27 or C30), 141.9 (C12 or C27 or C30), 144.0 (C12 or C27 or C30), 148.5 (C13), 168.9 (2C, C21 and C22), 170.9 (C16).

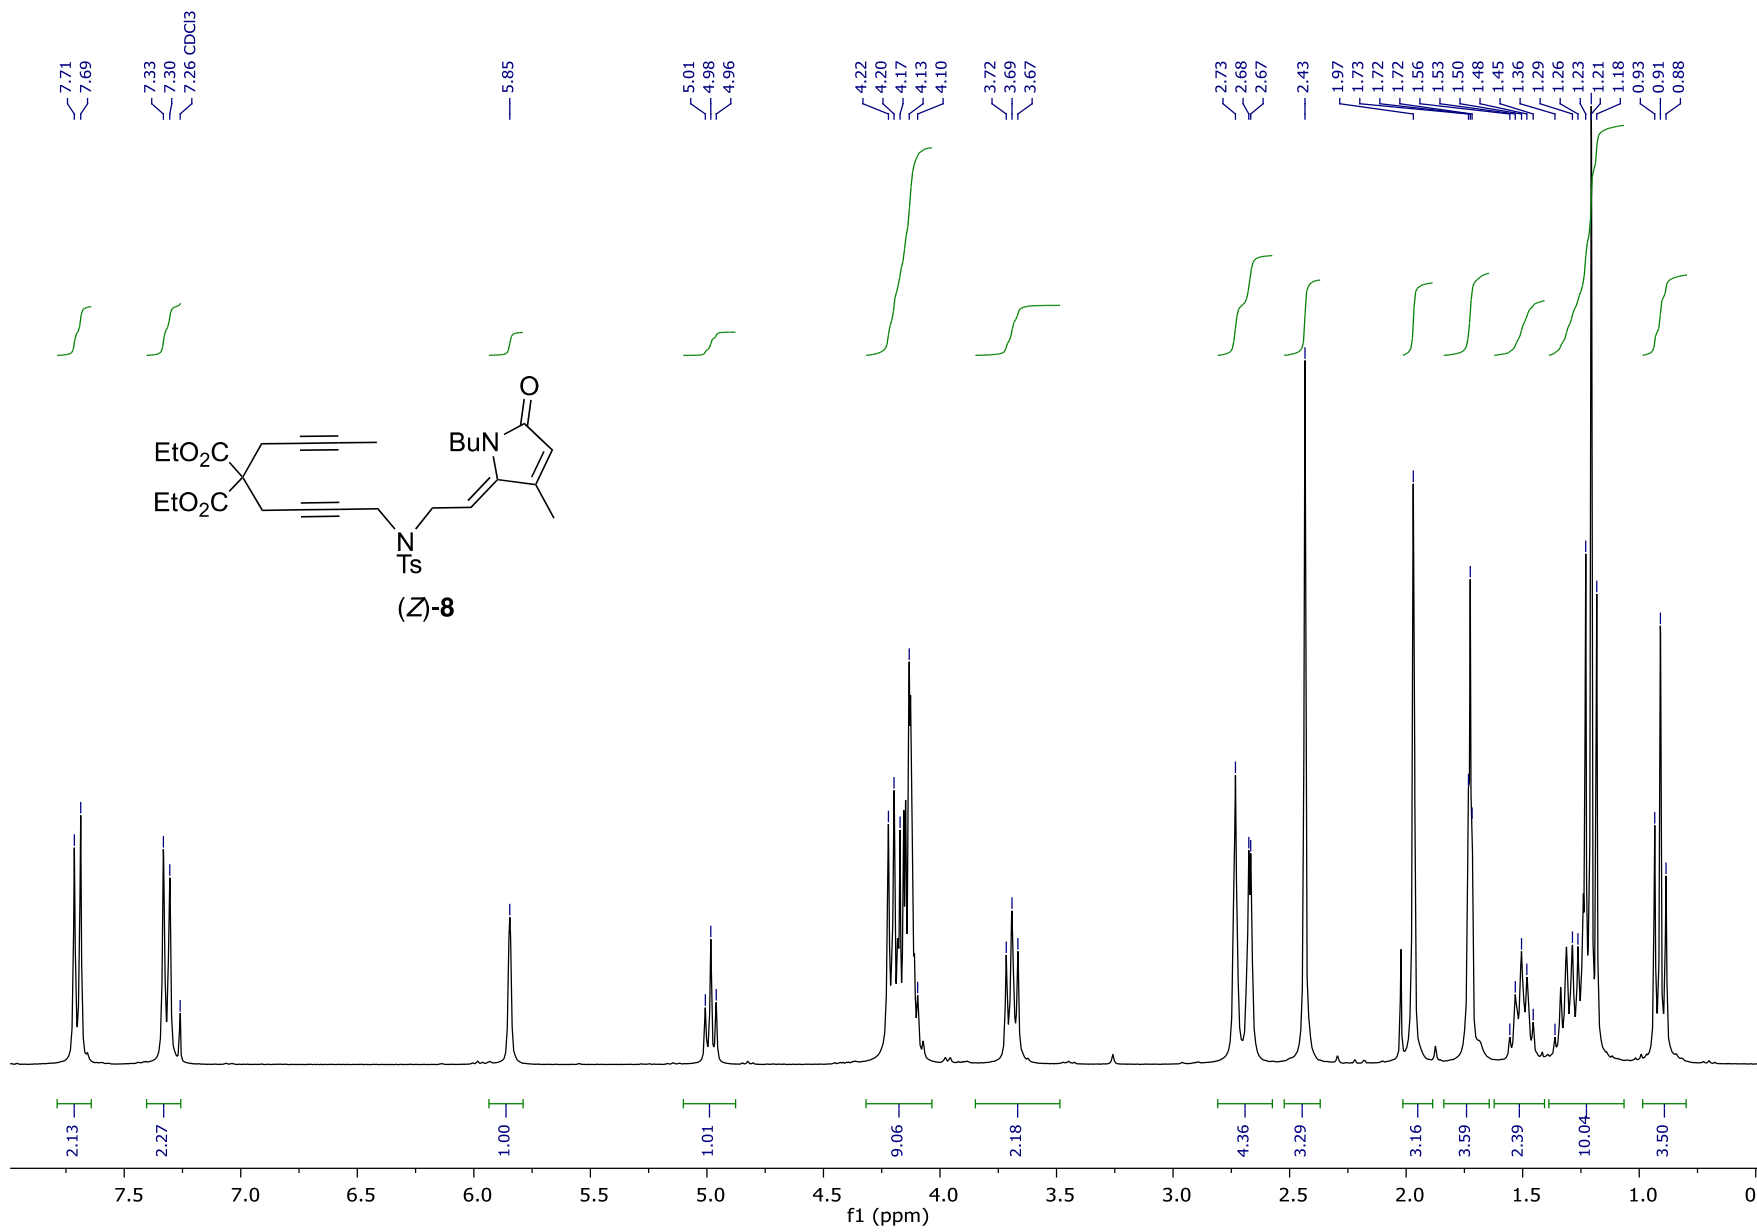

Figure S24. <sup>1</sup>H NMR (300 MHz, CDCl<sub>3</sub>) spectrum

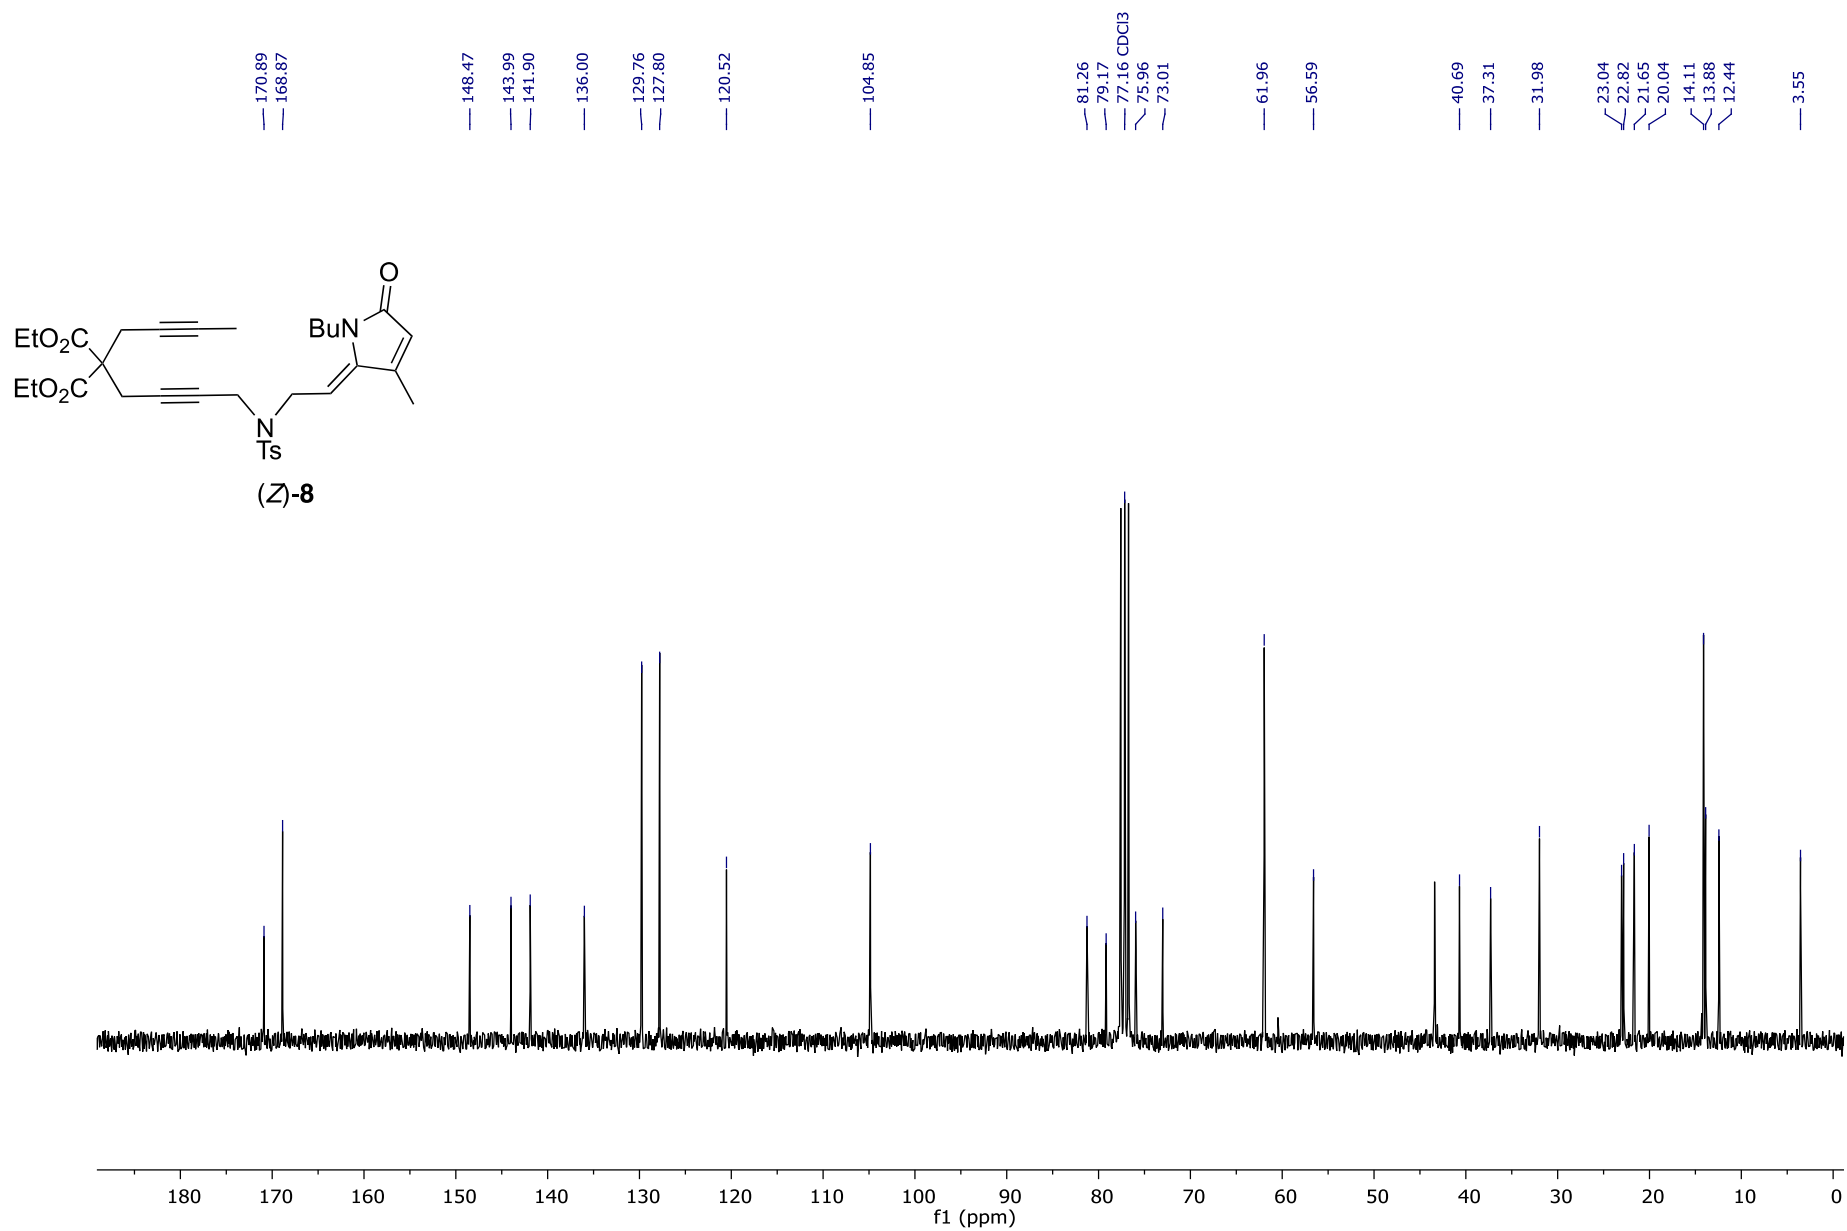

Figure S25. <sup>13</sup>C NMR (75 MHz, CDCl<sub>3</sub>) spectrum

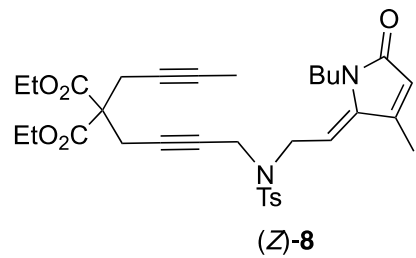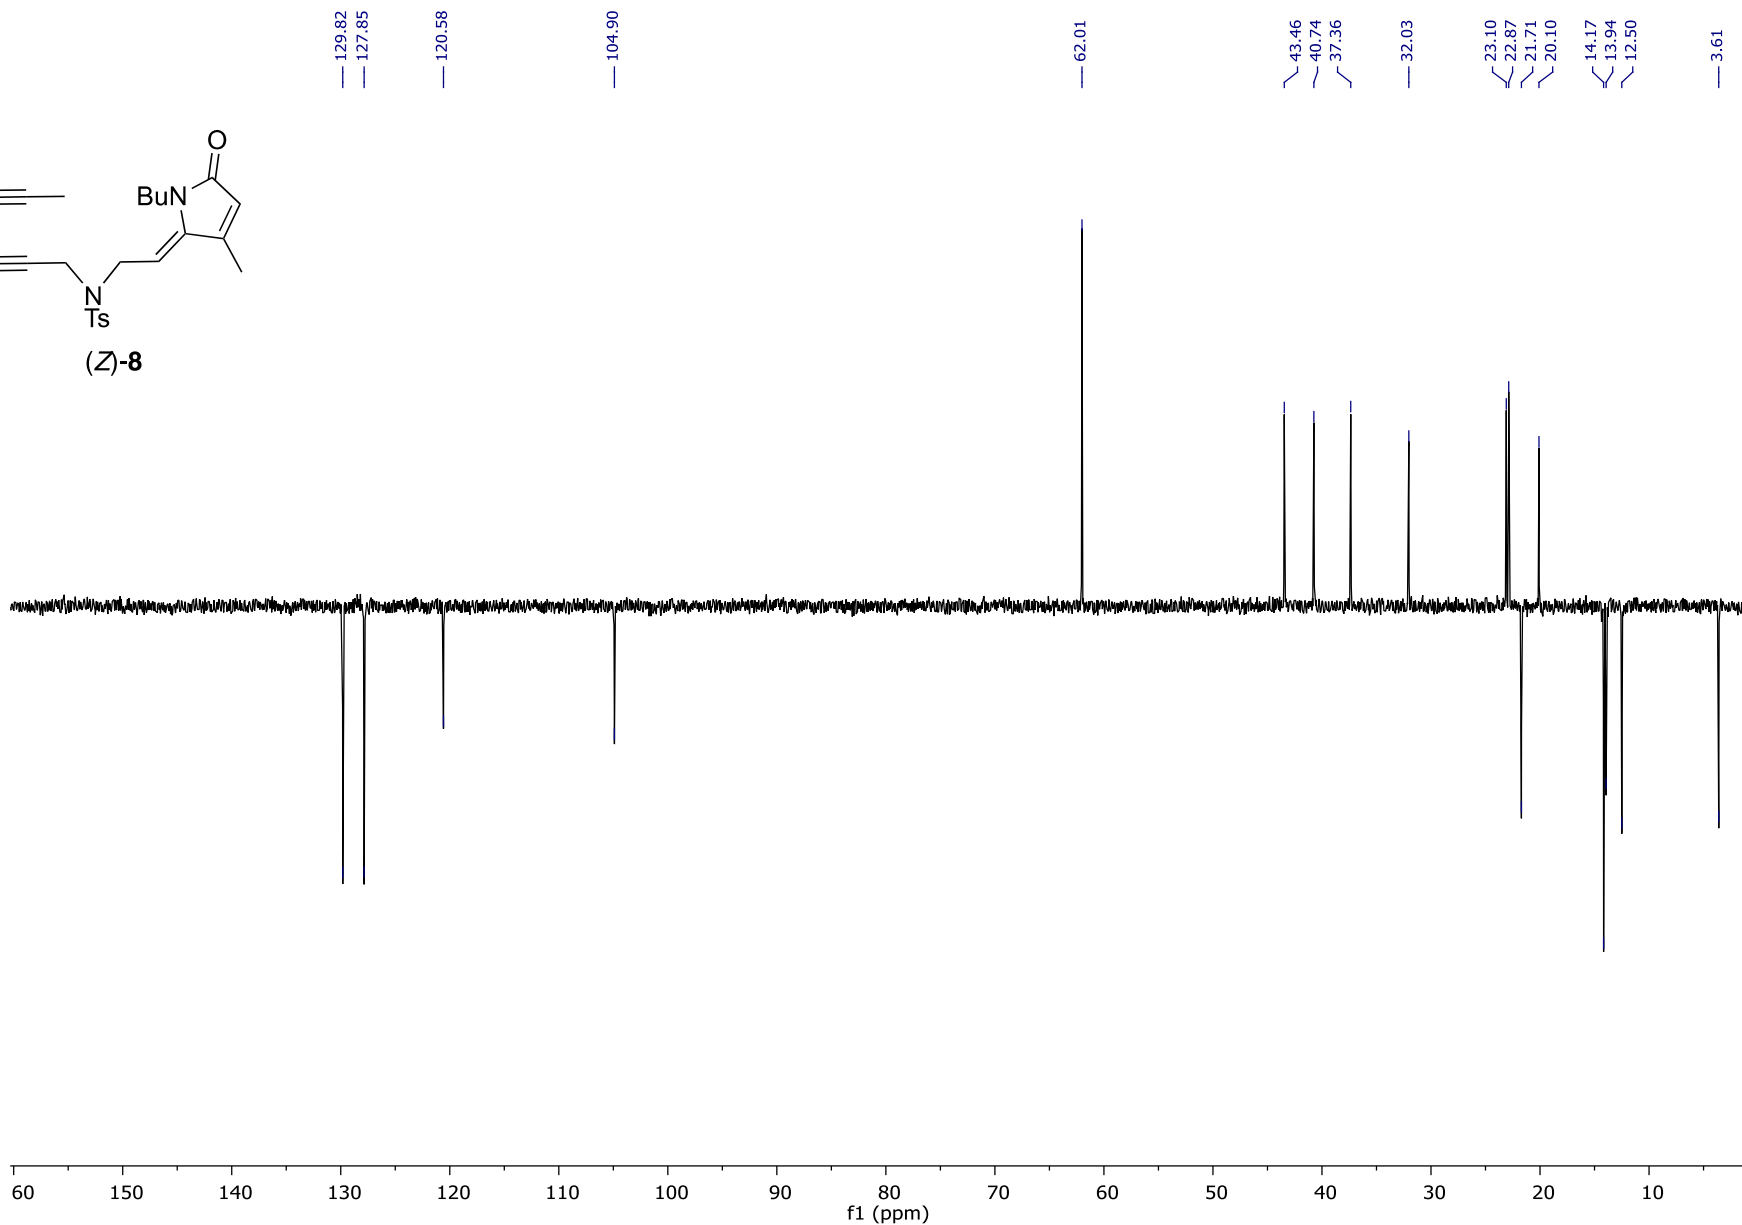

Figure S26. DEPT (75 MHz, CDCl<sub>3</sub>) spectrum

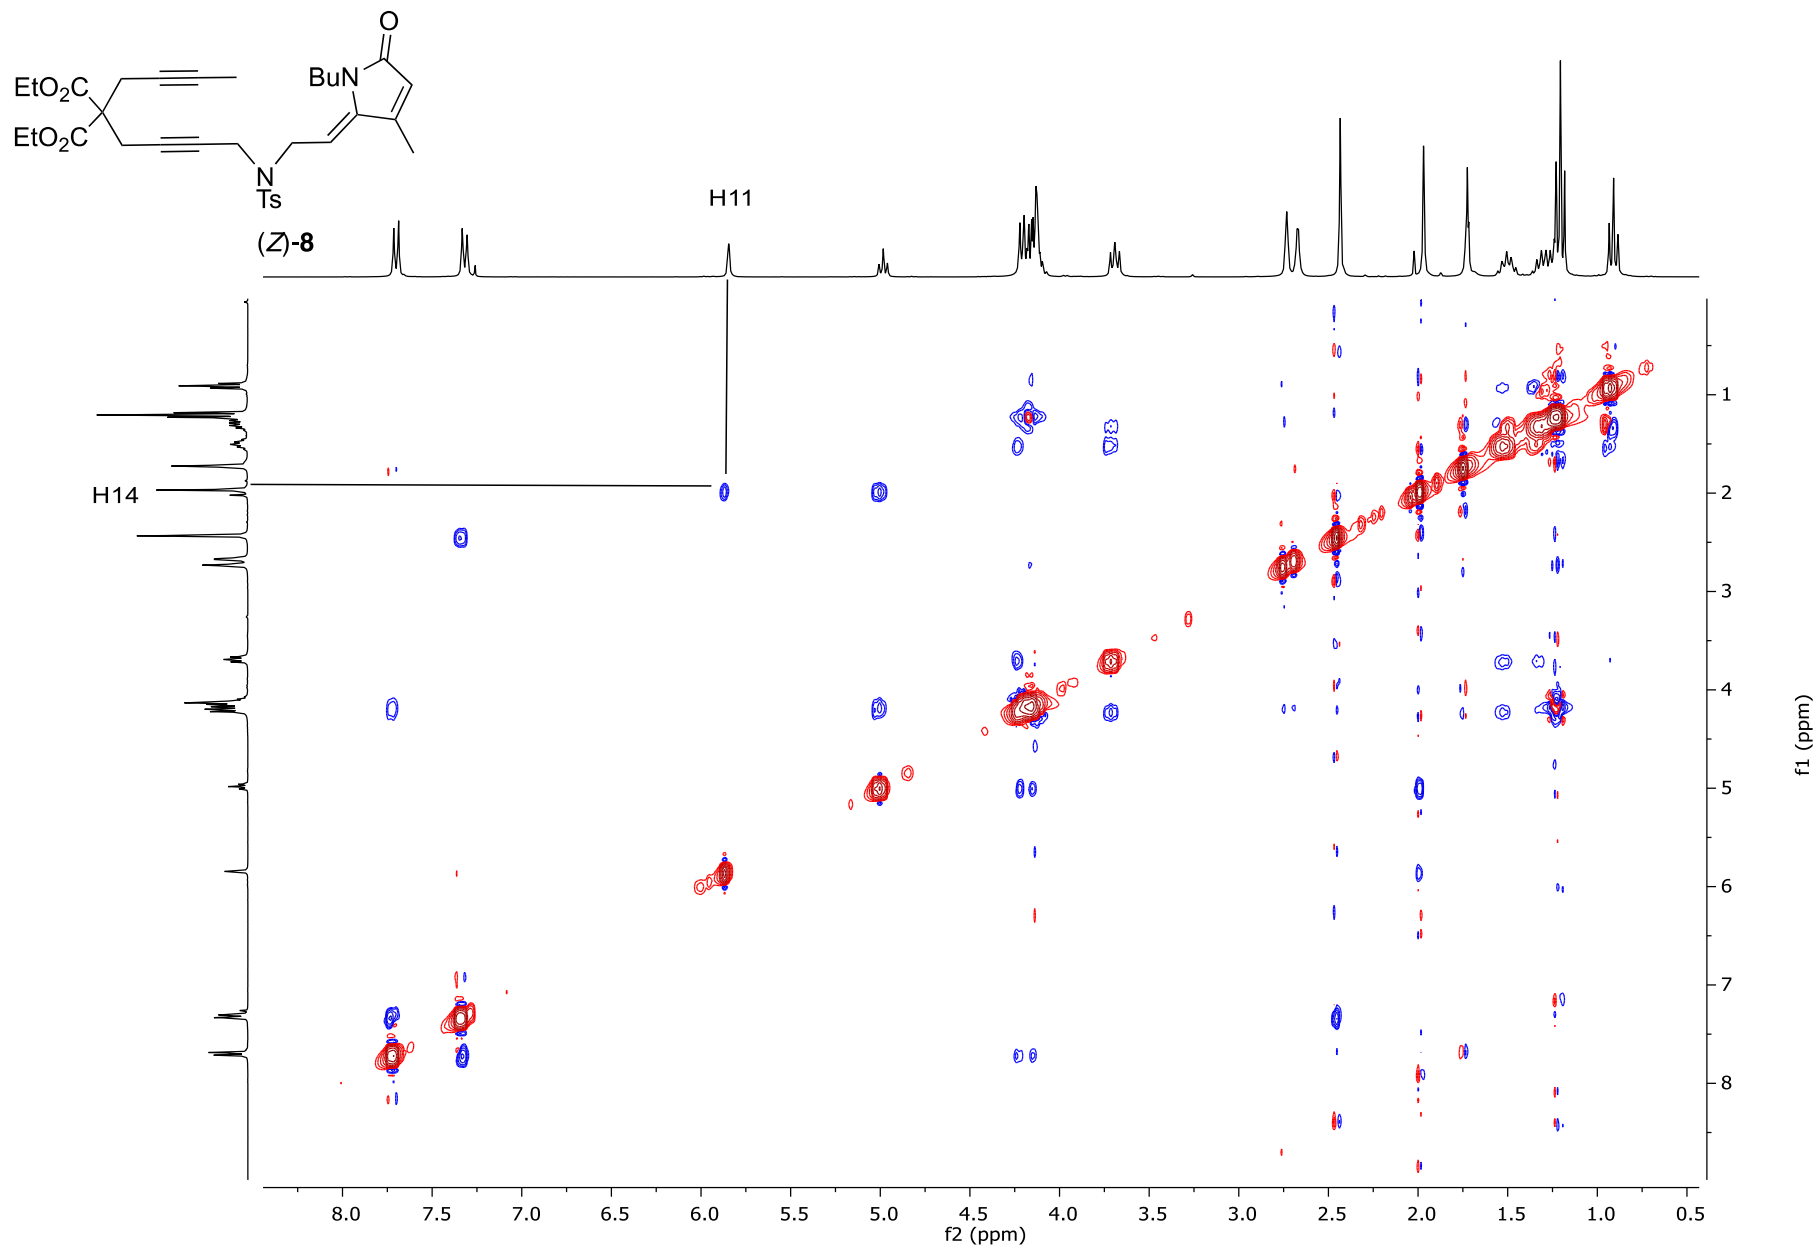

Figure S27. NOESY (CDCl<sub>3</sub>) spectrum

## Assignment of (E)-8

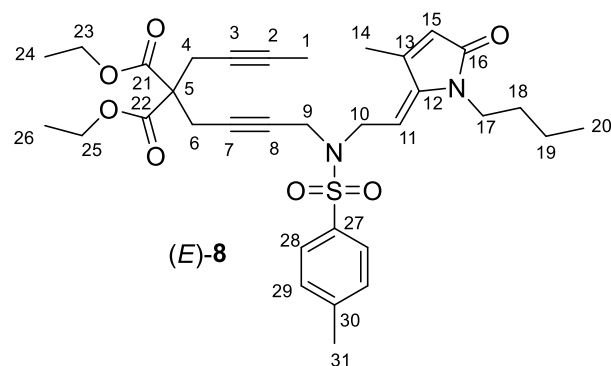

$^1\text{H}$  NMR (300 MHz, Chloroform-*d*)  $\delta$  0.89 (t,  $J = 7.2$  Hz, 3H, H20), 1.20 (t,  $J = 7.1$  Hz, 6H, H24 and H26), 1.18 – 1.30 (m, 2H, H19), 1.34 – 1.47 (m, 2H, H18), 1.72 (t,  $J = 2.5$  Hz, 3H, H1), 2.29 (br d,  $J = 1.6$  Hz, 3H, H14), 2.43 (s, 3H, H31), 2.67 (br q,  $J = 2.5$  Hz, 2H, H4), 2.74 (br t,  $J = 2.3$  Hz, 2H, H6), 3.44 (t,  $J = 7.2$  Hz, 2H, H17), 4.05 – 4.19 (m, 6H, H9, H23 and H25), 4.23 (d,  $J = 7.6$  Hz, 2H, H10), 5.14 (t,  $J = 7.6$  Hz, 1H, H11), 5.93 (br q,  $J = 1.6$  Hz, 1H, H15), 7.28 – 7.37 (d,  $J = 7.9$  Hz, 2H, HAr), 7.64 – 7.76 (d,  $J = 7.9$  Hz, 2H, HAr)

$^{13}\text{C}$  NMR (75 MHz,  $\text{CDCl}_3$ )  $\delta$  3.5 (C1), 13.9 (C20), 14.1 (2C, C24 and C26), 16.8 (C14), 20.2 (C19), 21.7 (C31), 22.8 (C6), 23.0 (C4), 30.8 (C18), 36.9 (C9), 38.6 (C17), 43.2 (C10), 56.5 (C5), 61.9 (2C, C23 and C25), 73.0 (C2 or C3 or C7 or C8), 76.1 (C2 or C3 or C7 or C8), 79.1 (C2 or C3 or C7 or C8), 81.1 (C2 or C3 or C7 or C8), 107.3 (C11), 124.7 (C15), 127.7 (2C, C28 or C29), 129.8 (2C, C28 or C29), 136.2 (C12 or C27, or C30), 142.2 (C12 or C27, or C30), 143.9 (C12 or C27, or C30), 145.7 (C13), 168.8 (2C, C21 and C22), 168.9 (C16)

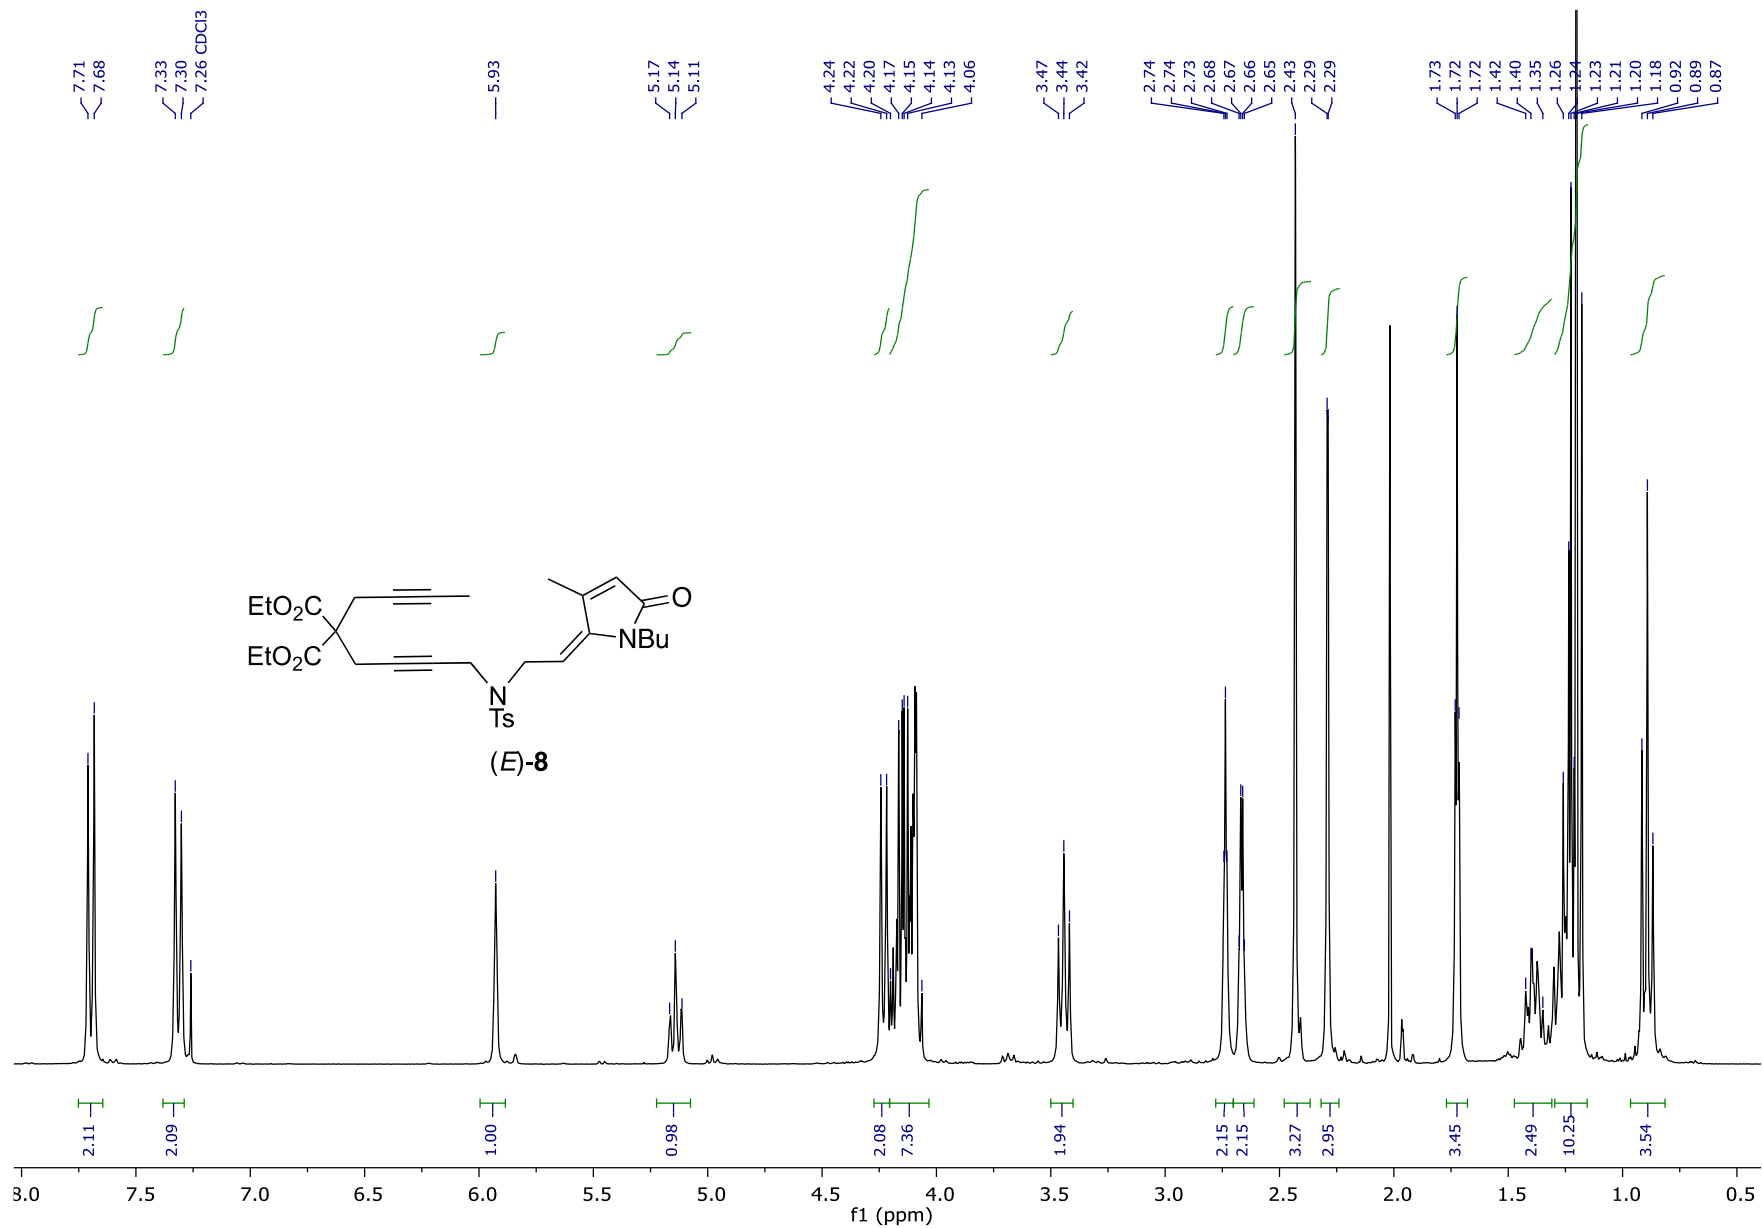

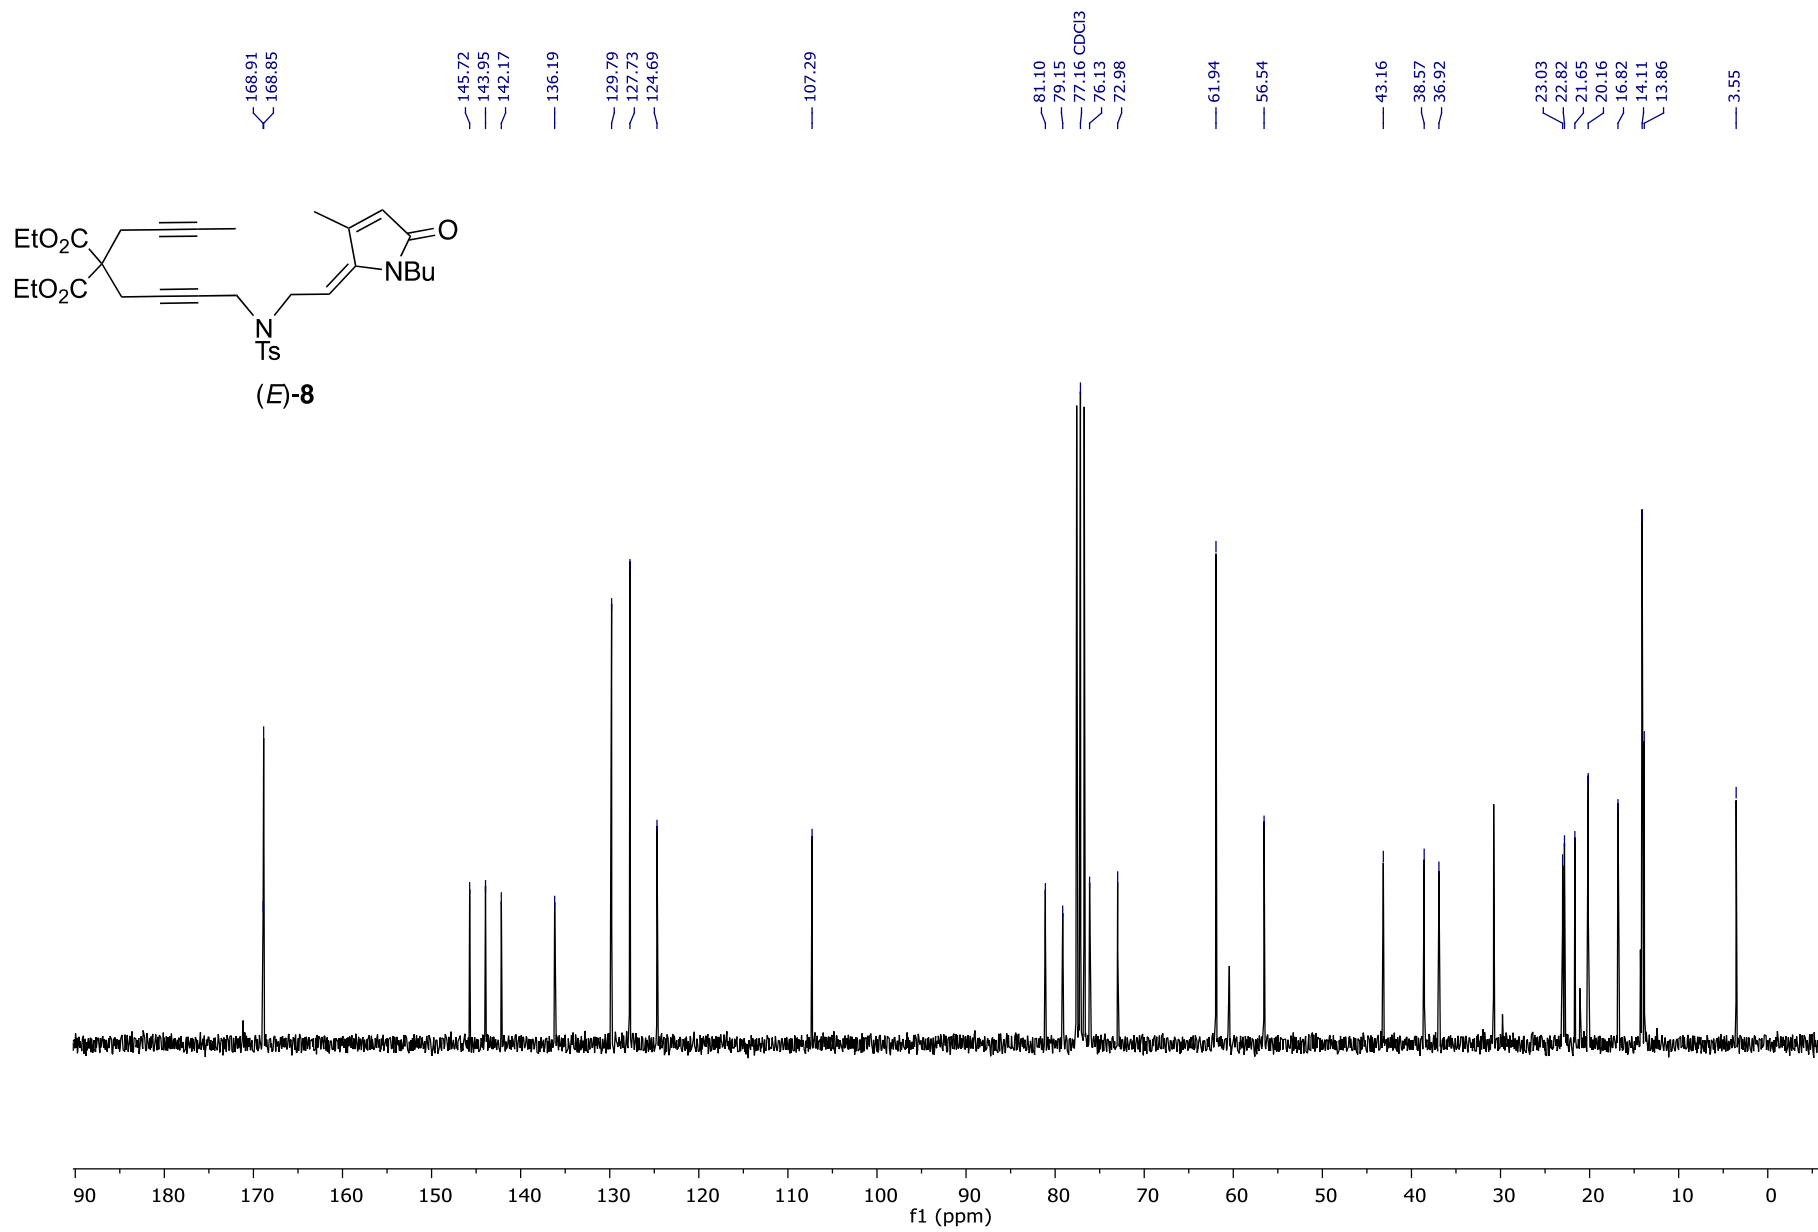

Figure S29.  $^{13}\text{C}$  NMR (75 MHz, CDCl<sub>3</sub>) spectrum





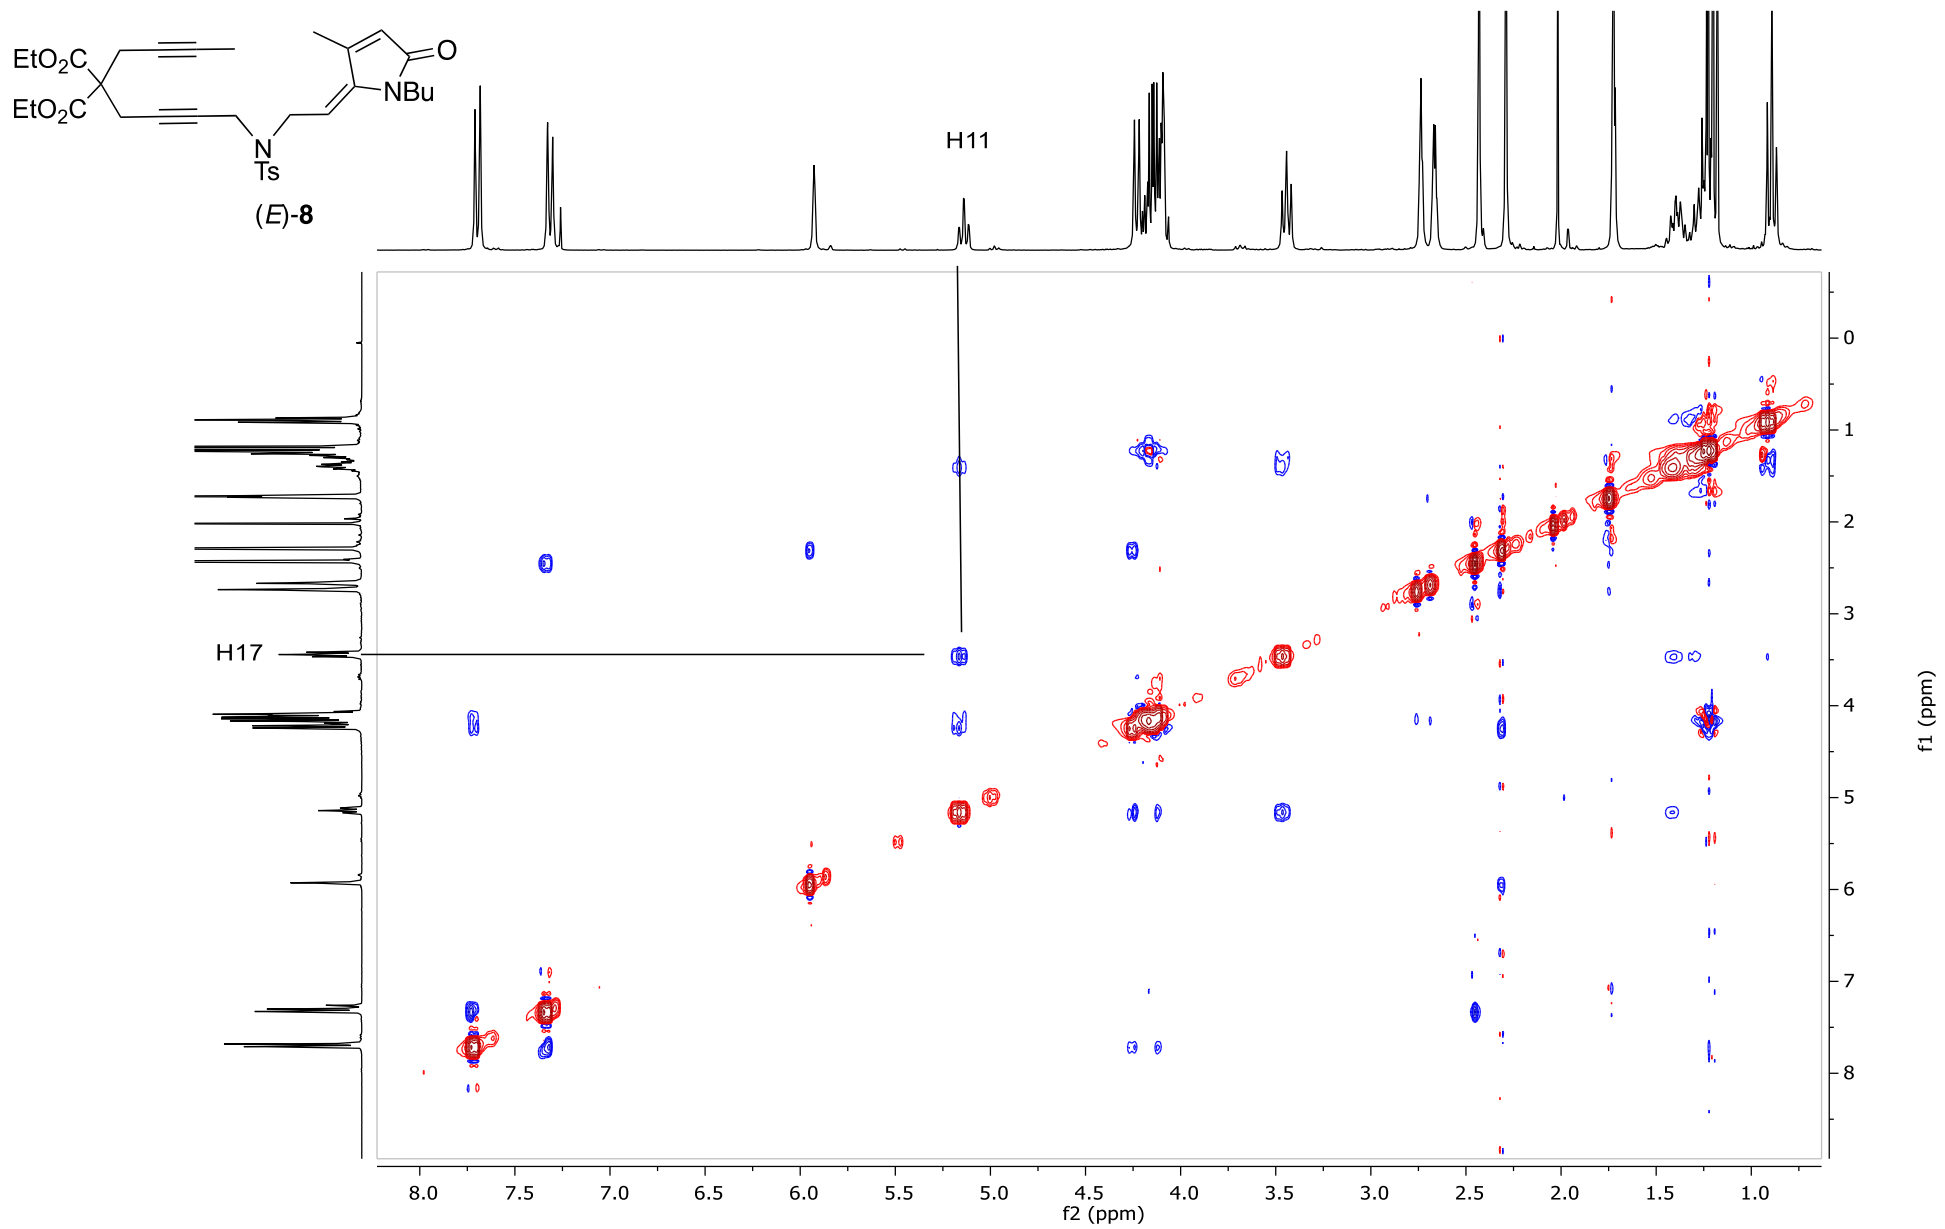

Figure S31. NOESY (CDCl<sub>3</sub>) spectrum

## Assignment of *cis*-9

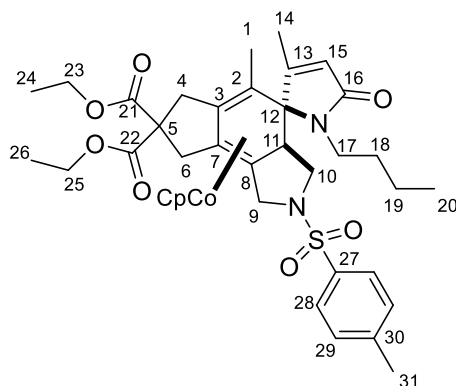

$^1\text{H}$  NMR (300 MHz, Chloroform-*d*)  $\delta$  0.69 (s, 3H, H1), 1.17 (t,  $J = 6.9$  Hz, 3H, H20), 1.29 (t,  $J = 7.1$  Hz, 3H, H24 or H26), 1.32-1.36 (m, 7H, H11, H14 and H24 or H26), 1.41 – 1.70 (m, 4H, H18 and H19), 2.20-2.35 (m, 1H, H17), 2.45 (s, 3H, H31), 3.10 – 3.66 (m, 9 H, H4, H6, H9, H10 and H17), 4.12 (s, 5H, Cp), 4.25 (q,  $J = 7.1$ , 2H, H23 or H25), 4.35 (br q,  $J = 7.1$  Hz, 2H, H23 or H25), 5.59 (br q,  $J = 1.6$  Hz, 1H, H15), 7.42 (d,  $J = 8.1$  Hz, 2H, HAr), 7.82 (d,  $J = 8.1$  Hz, 2H, HAr)

$^{13}\text{C}$  NMR (75 MHz, Chloroform-*d*)  $\delta$  12.6 (C14), 14.2 (C24 or C26), 14.3 (2C, C24 or C26 and C20), 17.5 (C1), 21.6 (C18 or C19), 21.7 (C31), 30.2 (C17), 39.4 (C4 or C6), 40.1 (C4 or C6), 44.0 (C5), 48.7 (C11), 51.4 (C9 or C10), 53.6 (C9 or C10), 59.4 (C12), 60.5 (C2 or C3 or C7 or C8), 62.4 (C23 or C25), 62.6 (C23 or C25), 63.7 (C2 or C3 or C7 or C8), 84.0 (5C, Cp), 89.8 (C2 or C3 or C7 or C8), 95.2 (C2 or C3 or C7 or C8), 121.4 (C15), 127.9 (2C, C28 or C29), 130.0 (2C, C28 or C29), 134.0 (C27 or C30), 144.2 (C27 or C30), 160.6 (C2 or C3 or C7 or C8), 171.7 (C16 or C21 or C22), 172.2 (C16 or C21 or C22), 173.4 (C16 or C21 or C22)

*one quaternary C carbon is in CDCl<sub>3</sub> peaks*

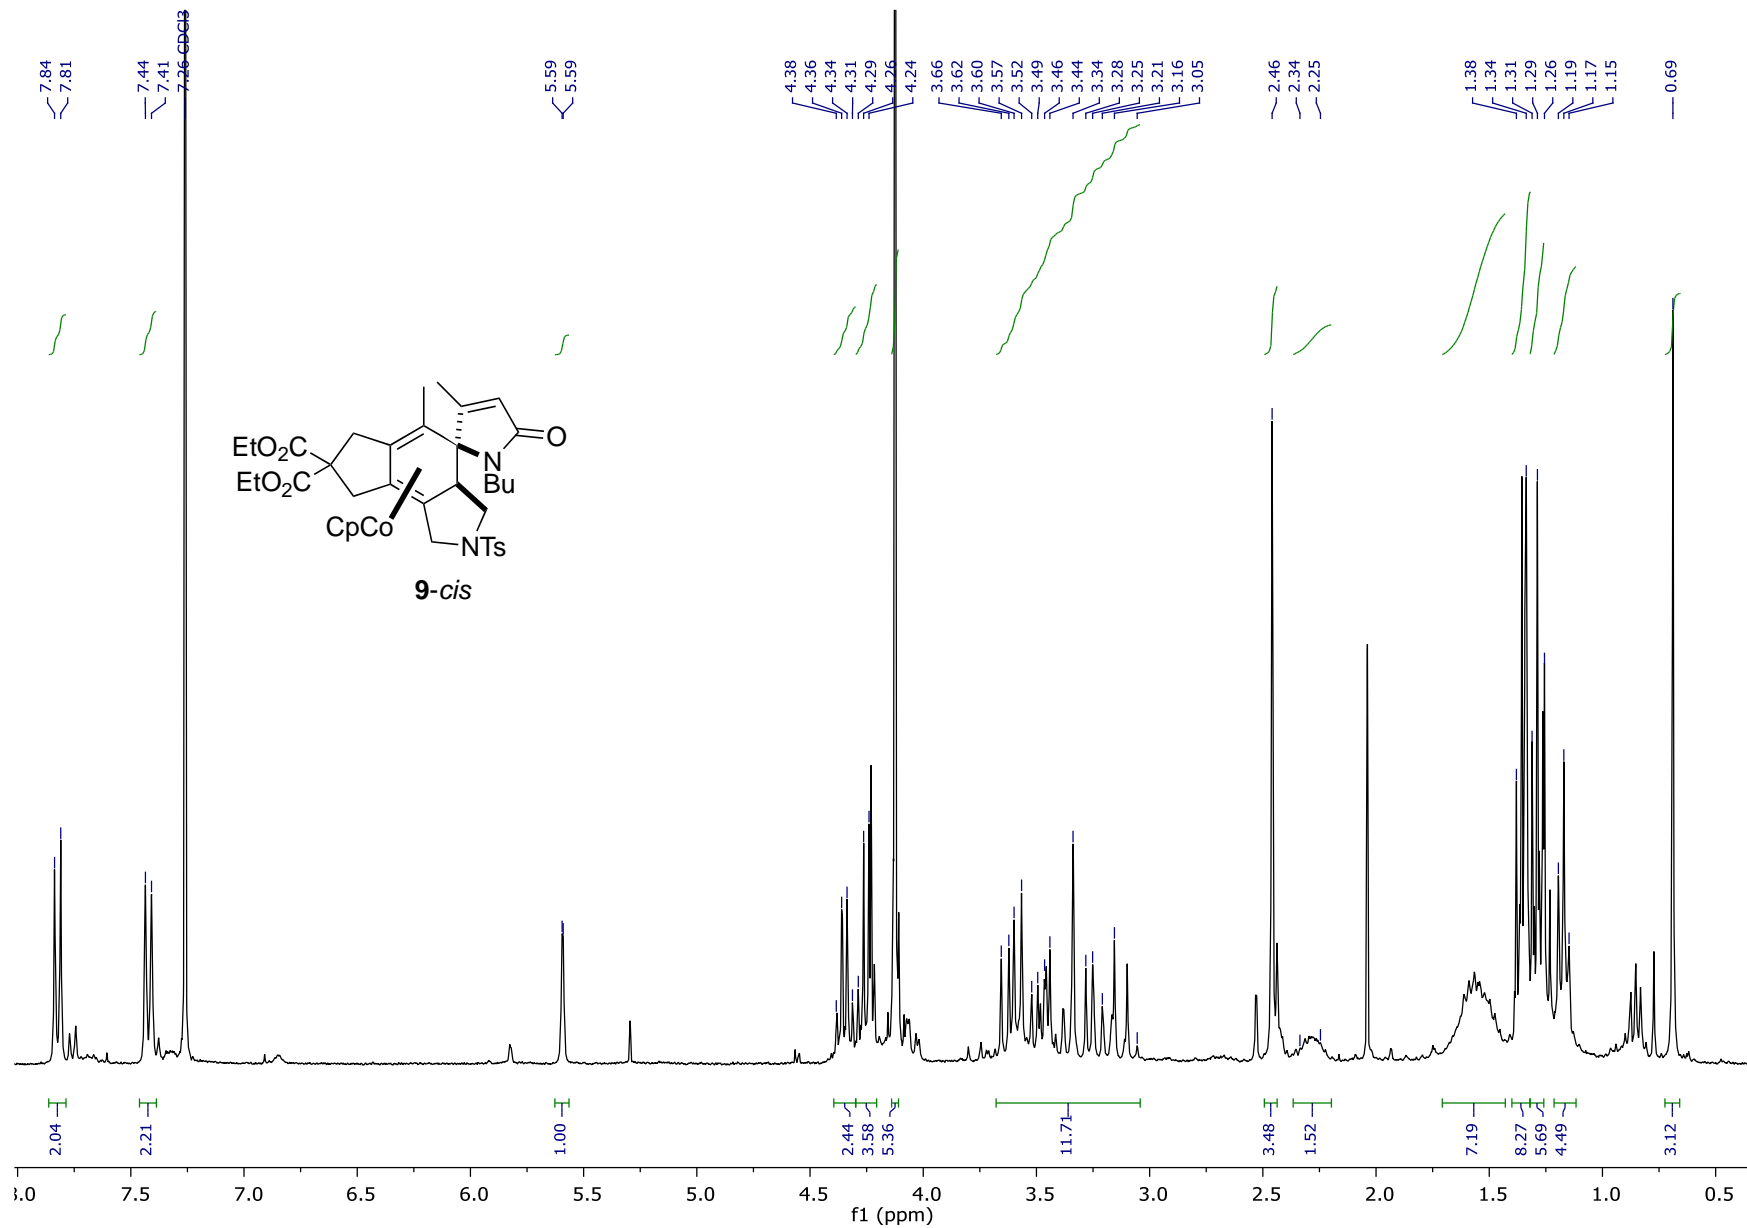

Figure S32. <sup>1</sup>H NMR (300 MHz, CDCl<sub>3</sub>) spectrum

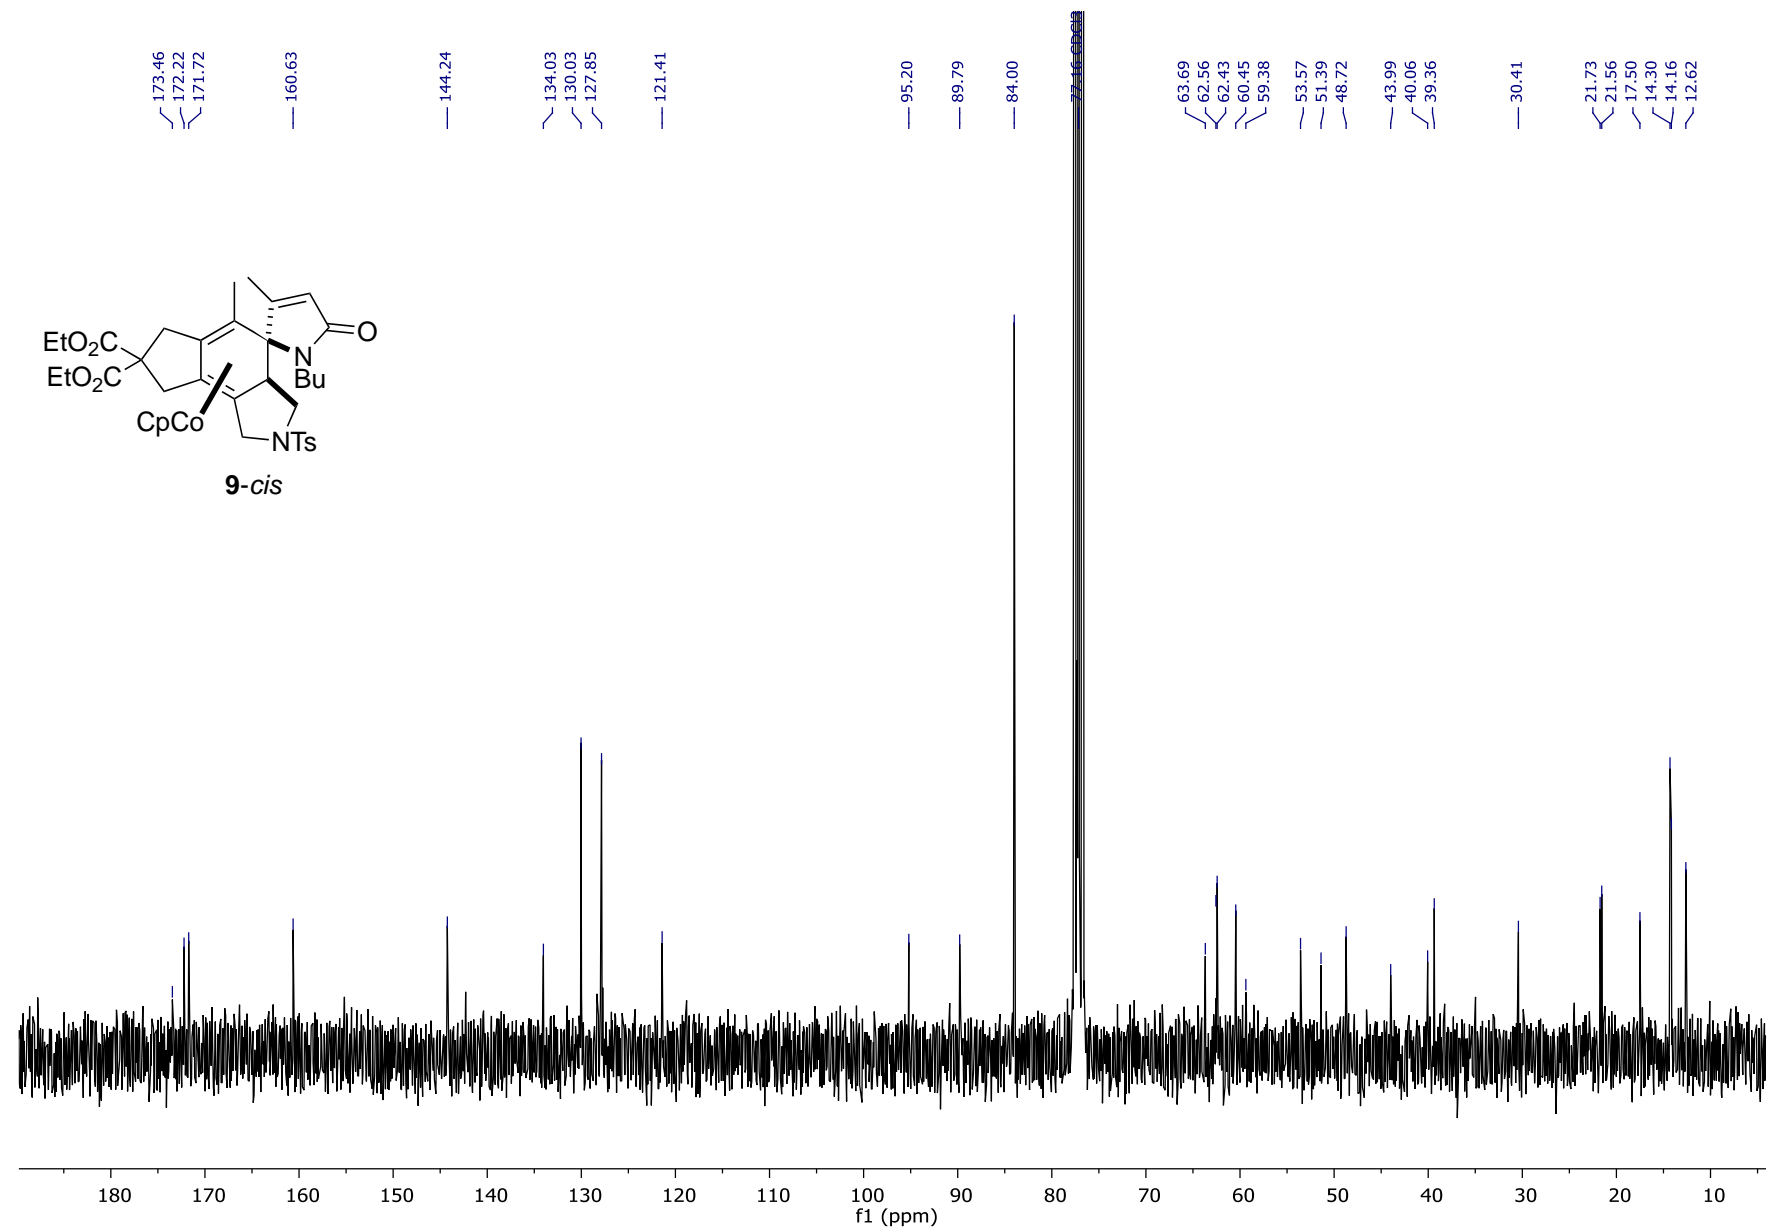

Figure S33. <sup>13</sup>C NMR (75 MHz, CDCl<sub>3</sub>) spectrum

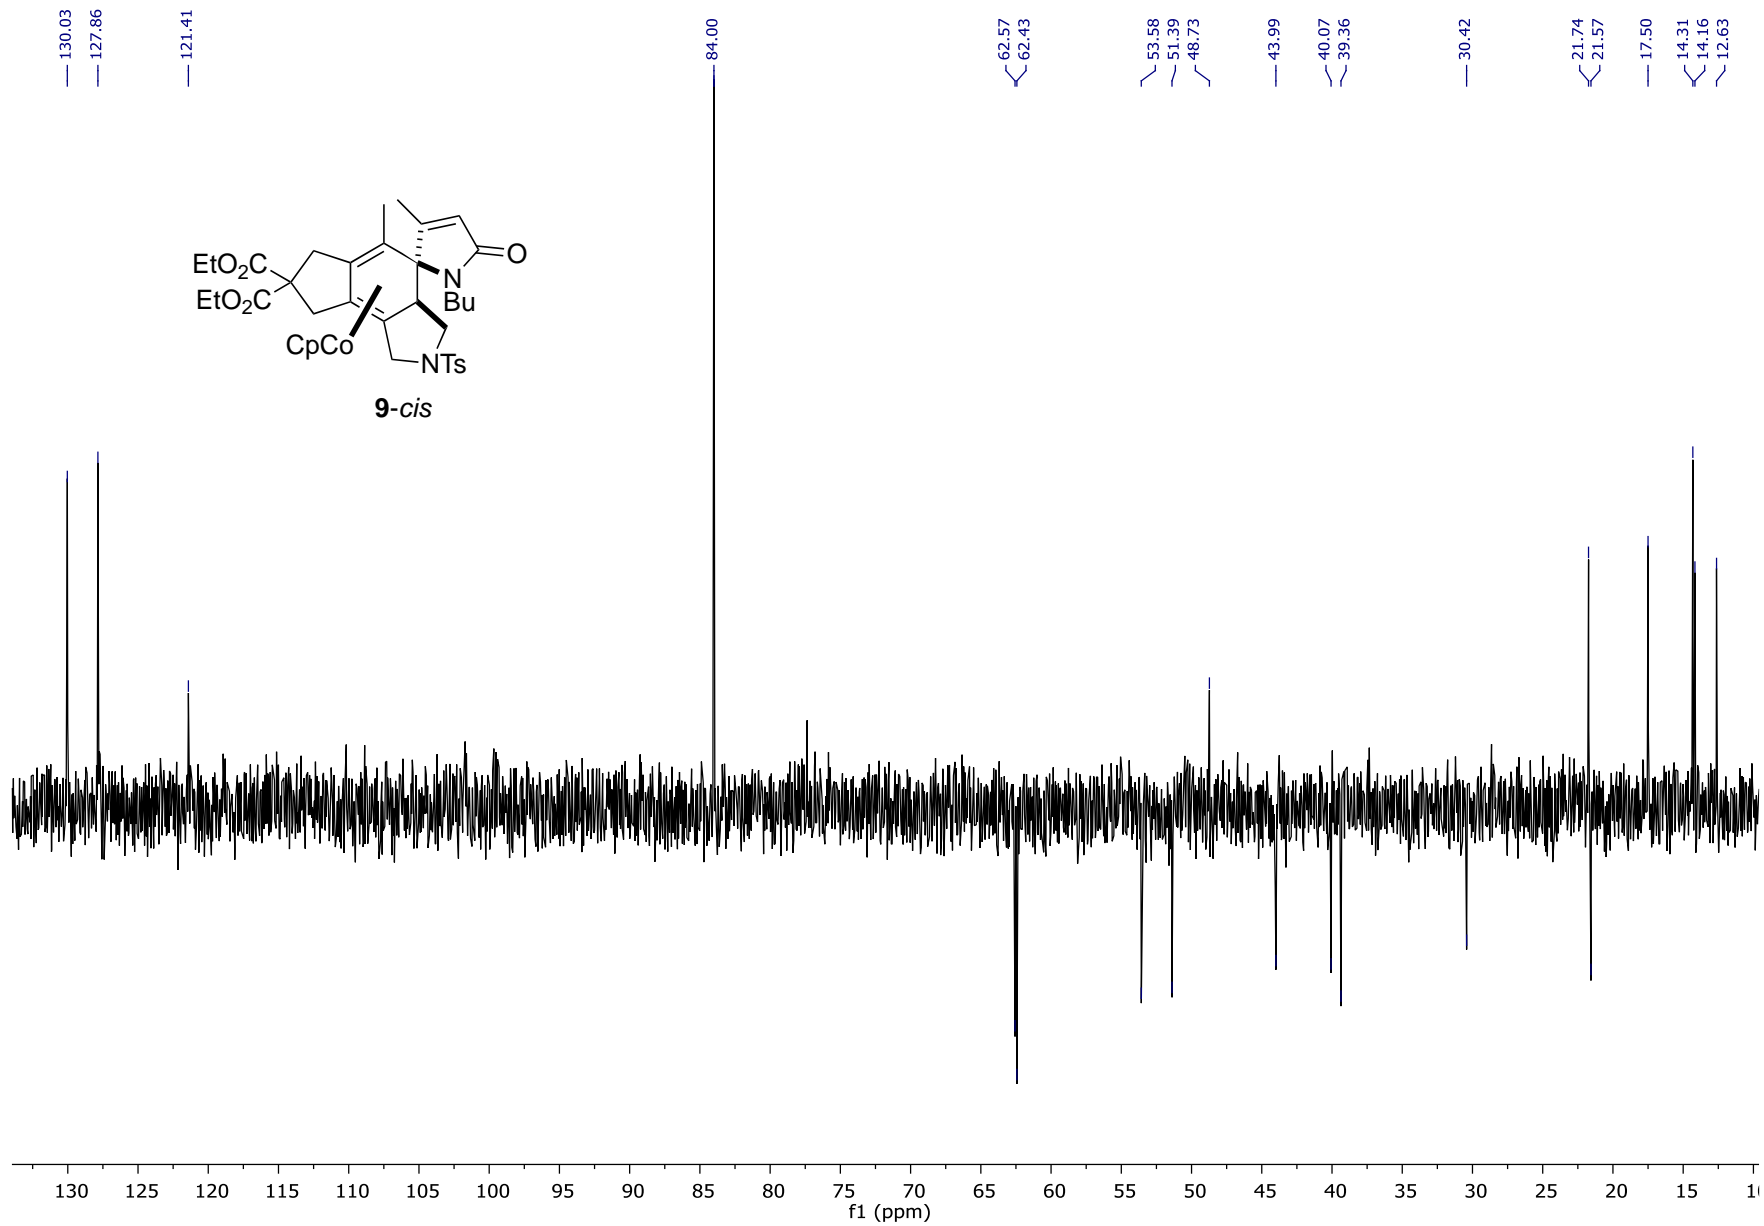

Figure S34. DEPT (75 MHz, CDCl<sub>3</sub>) spectra

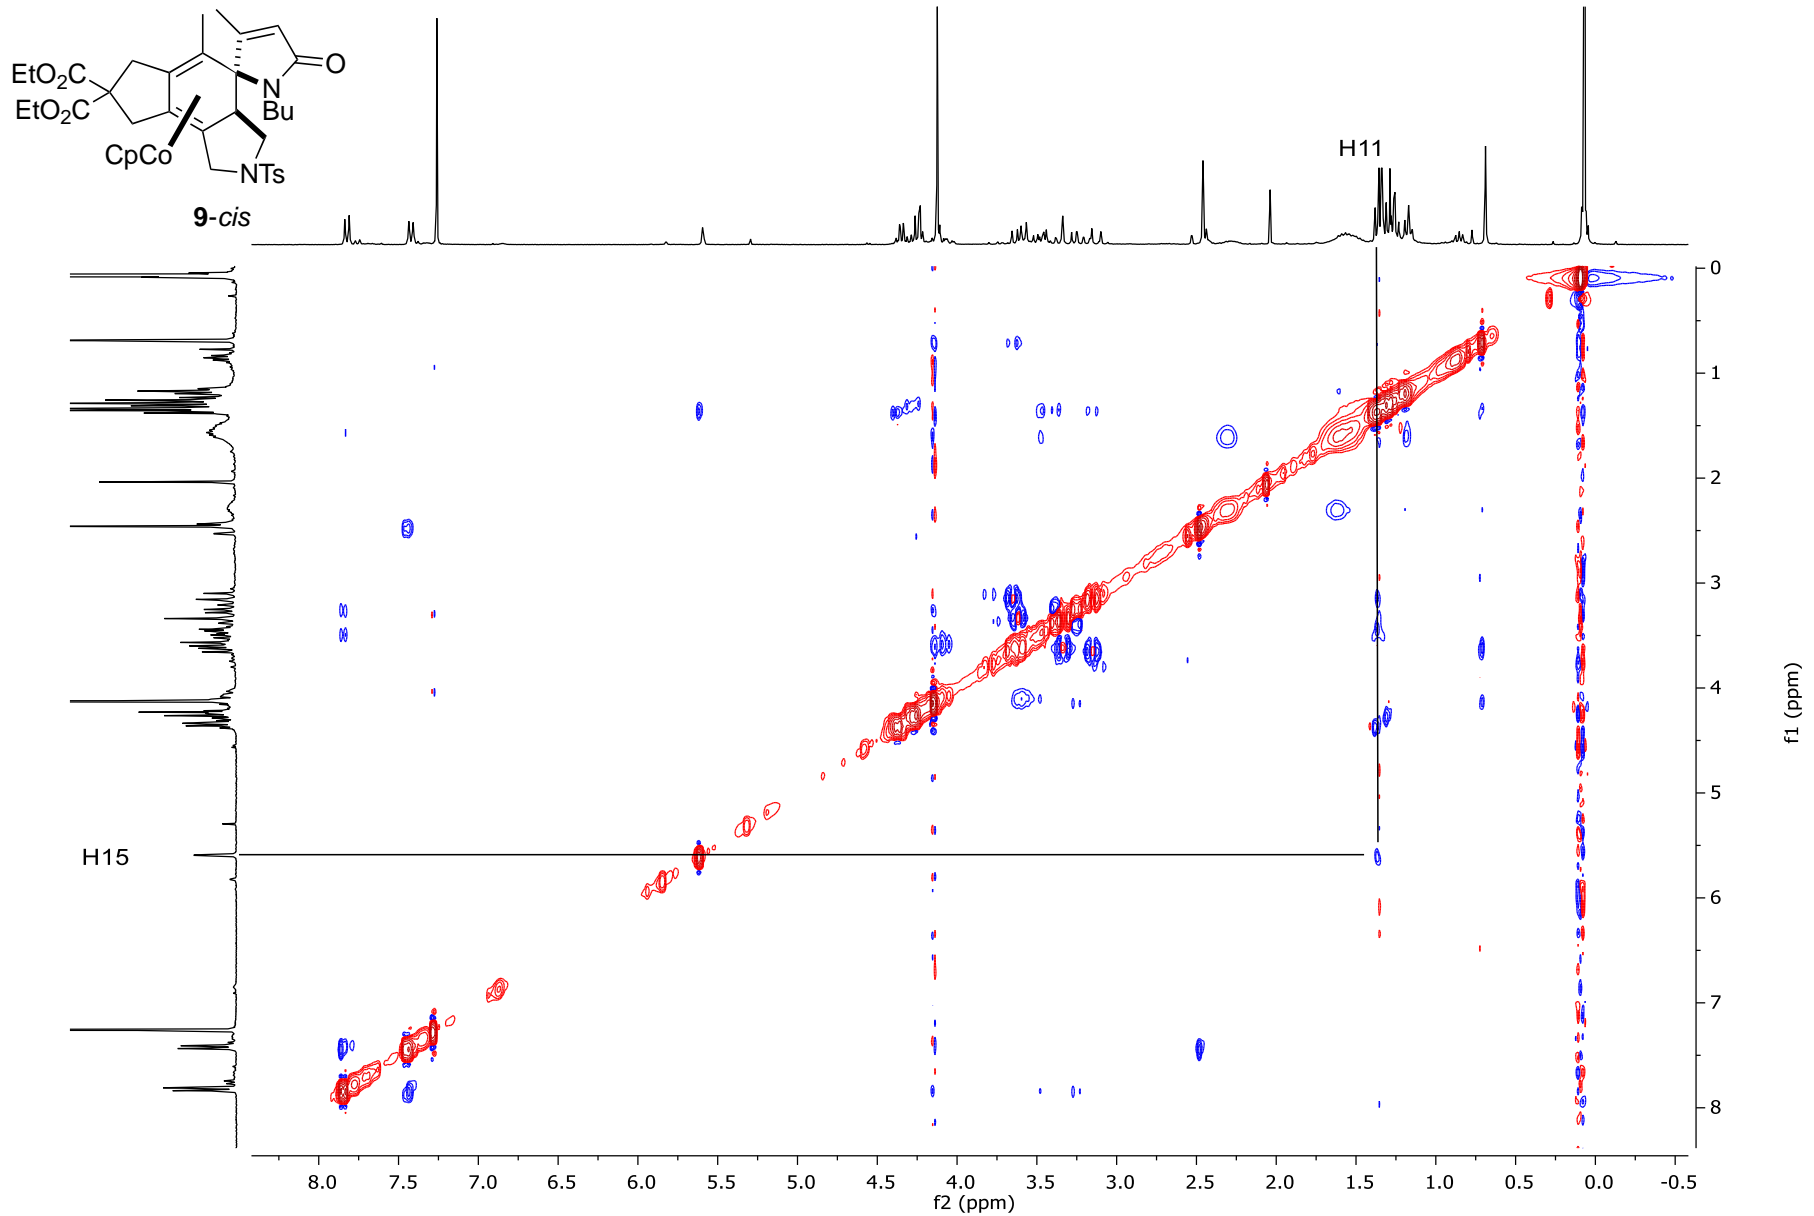

Figure S35. NOESY (CDCl<sub>3</sub>) spectrum

## Assignment of *trans*-9

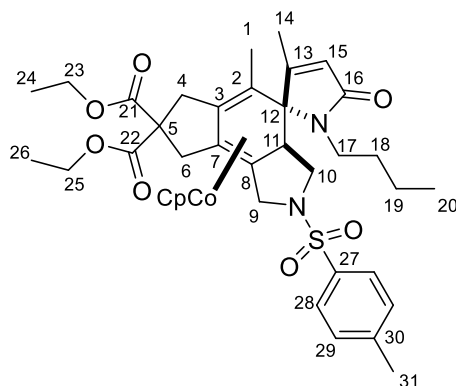

$^1\text{H}$  NMR (300 MHz, Chloroform-*d*)  $\delta$  0.77 (s, 3H, H1), 0.83 (t,  $J = 7.0$  Hz, 3H, H20), 1.09 – 1.20 (m, 3H, H18 and H19), 1.20 – 1.27 (m, 1H, H11), 1.30 (t,  $J = 7.1$  Hz, 3H, H24 or H26), 1.36 (t,  $J = 7.1$  Hz, 3H, H24 or H26), 1.41 – 1.51 (m, 1H, H18 and H19), 2.26- 2.38 (m, 1H, H17), 2.43 (s, 3H, H31), 2.53 (br d,  $J = 1.5$  Hz, 3H, H14), 2.60 – 2.73 (m, 1H, H17), 3.08 (d,  $J = 17.0$  Hz, 1H, H4 or H6), 3.16 (br s, 2H, H9), 3.34 (br dd,  $J = 7.8$  and 8.6 Hz, 1H, H10), 3.45 (d,  $J = 17.0$  Hz, 1H, H4 or H6), 3.55 (d,  $J = 17.0$  Hz, 1H, H4 or H6), 3.68 – 3.73 (m, 1H, H10), 3.73 (d,  $J = 17.0$  Hz, 1H, H4 or H6), 4.23 (s, 5H, Cp), 4.23 – 4.39 (m, 4H, H23 and H25), 5.82 (br q,  $J = 1.5$  Hz, 1H, H15), 7.39 (d,  $J = 8.3$  Hz, 2H, HAr), 7.75 (d,  $J = 8.3$  Hz, 2H, HAr)

$^{13}\text{C}$  NMR (75 MHz, Chloroform-*d*)  $\delta$  13.9 (C20), 14.2 (C24 or C26), 14.3 (C24 or C26), 17.8 (C14), 17.9 (C1), 20.5 (C18 or C19), 21.7 (C31), 30.8 (C18 or C19), 39.3 (C4 or C6 or C17), 39.7 (C4 or C6 or C17), 39.8 (C4 or C6 or C17), 49.4 (C11), 50.9 (C10), 53.2 (C9), 56.5 (C5 or C12), 59.8 (C5 or C12), 60.1 (C2 or C3 or C7 or C8), 62.4 (C23 or C25), 62.6 (C23 or C25), 77.5 (C2 or C3 or C7 or C8), 84.0 (5C, Cp), 89.7 (C2 or C3 or C7 or C8), 95.2 (C2 or C3 or C7 or C8), 126.3 (C15), 127.7 (2C, C28 or C29), 130.0 (2C, C28 or C29), 134.1 (C27 or C30), 144.1 (C27 or C30), 158.2 (C2 or C3 or C7 or C8), 169.6 (C21 or C22), 171.7 (C21 or C22), 171.9 (C16)



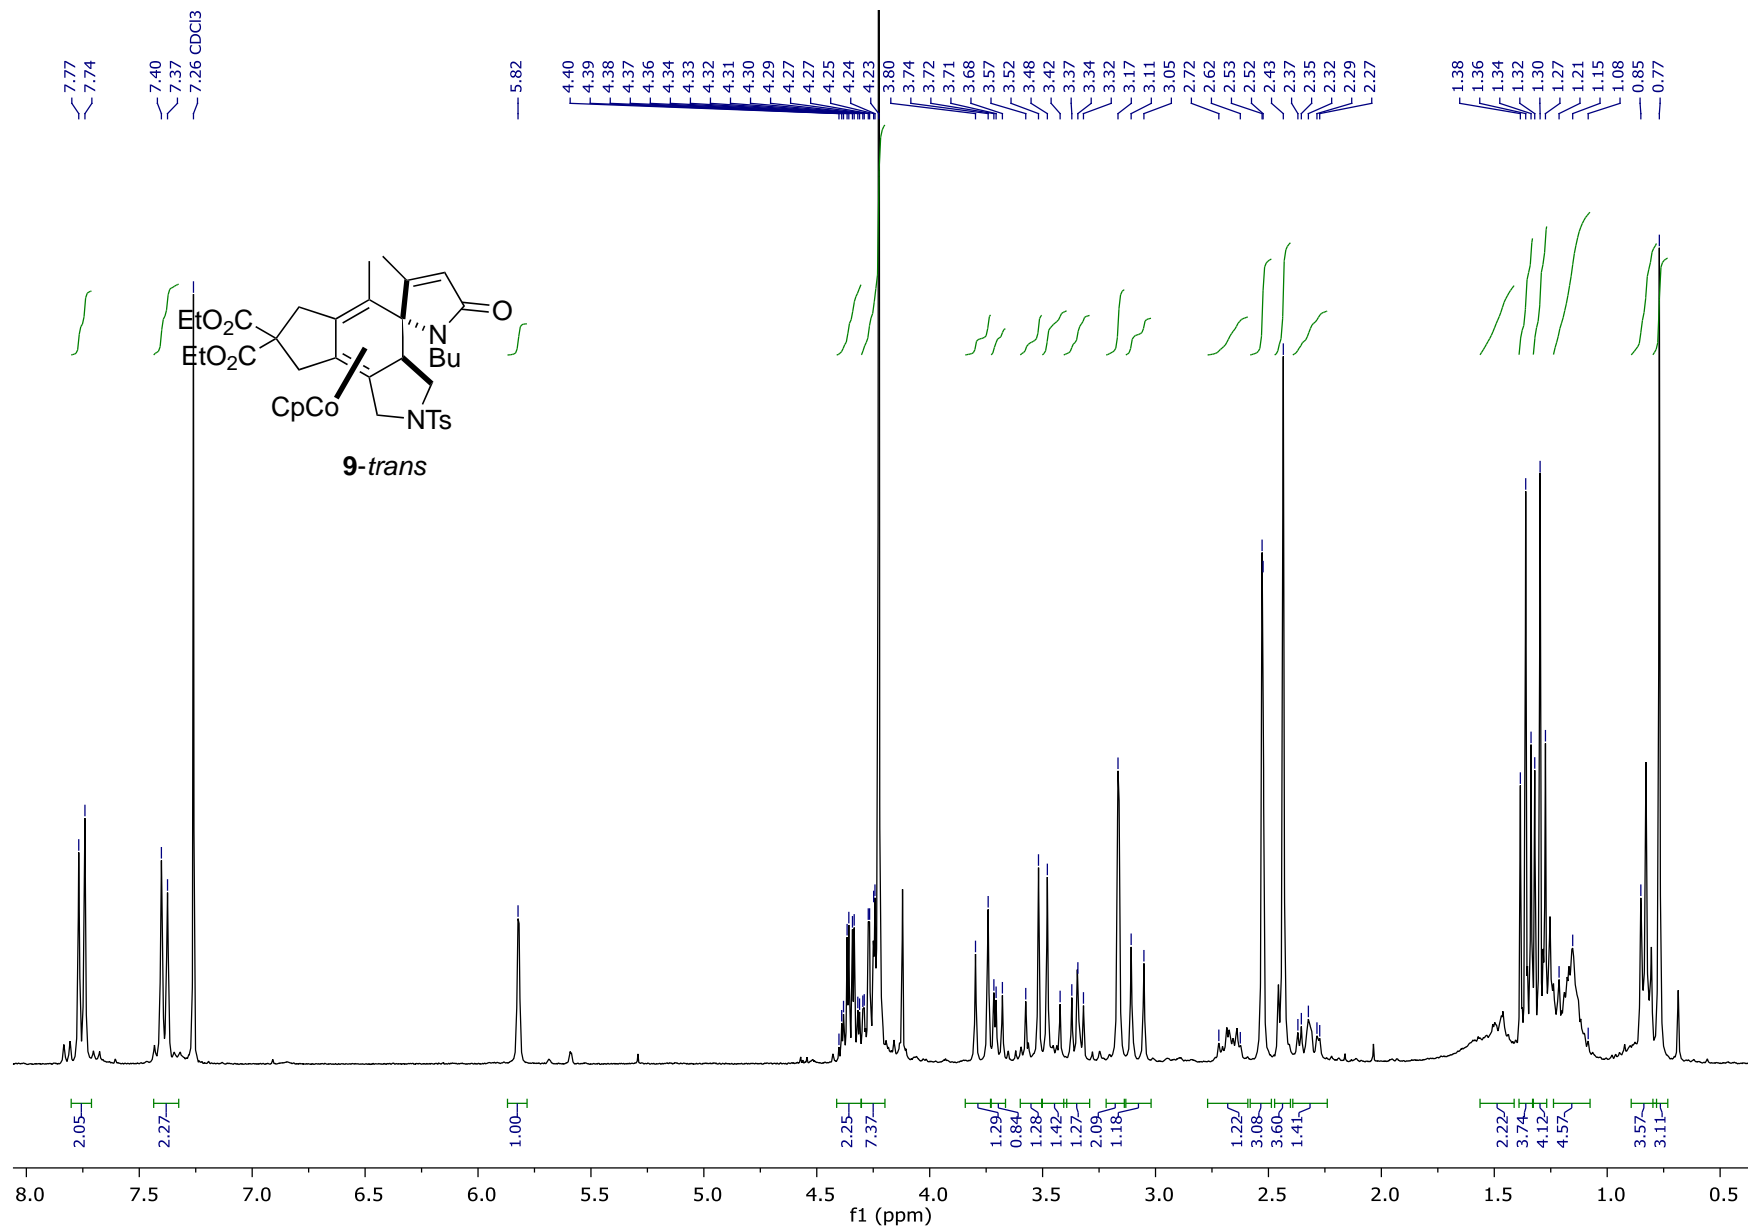

Figure S36. <sup>1</sup>H NMR (300 MHz, CDCl<sub>3</sub>) spectrum

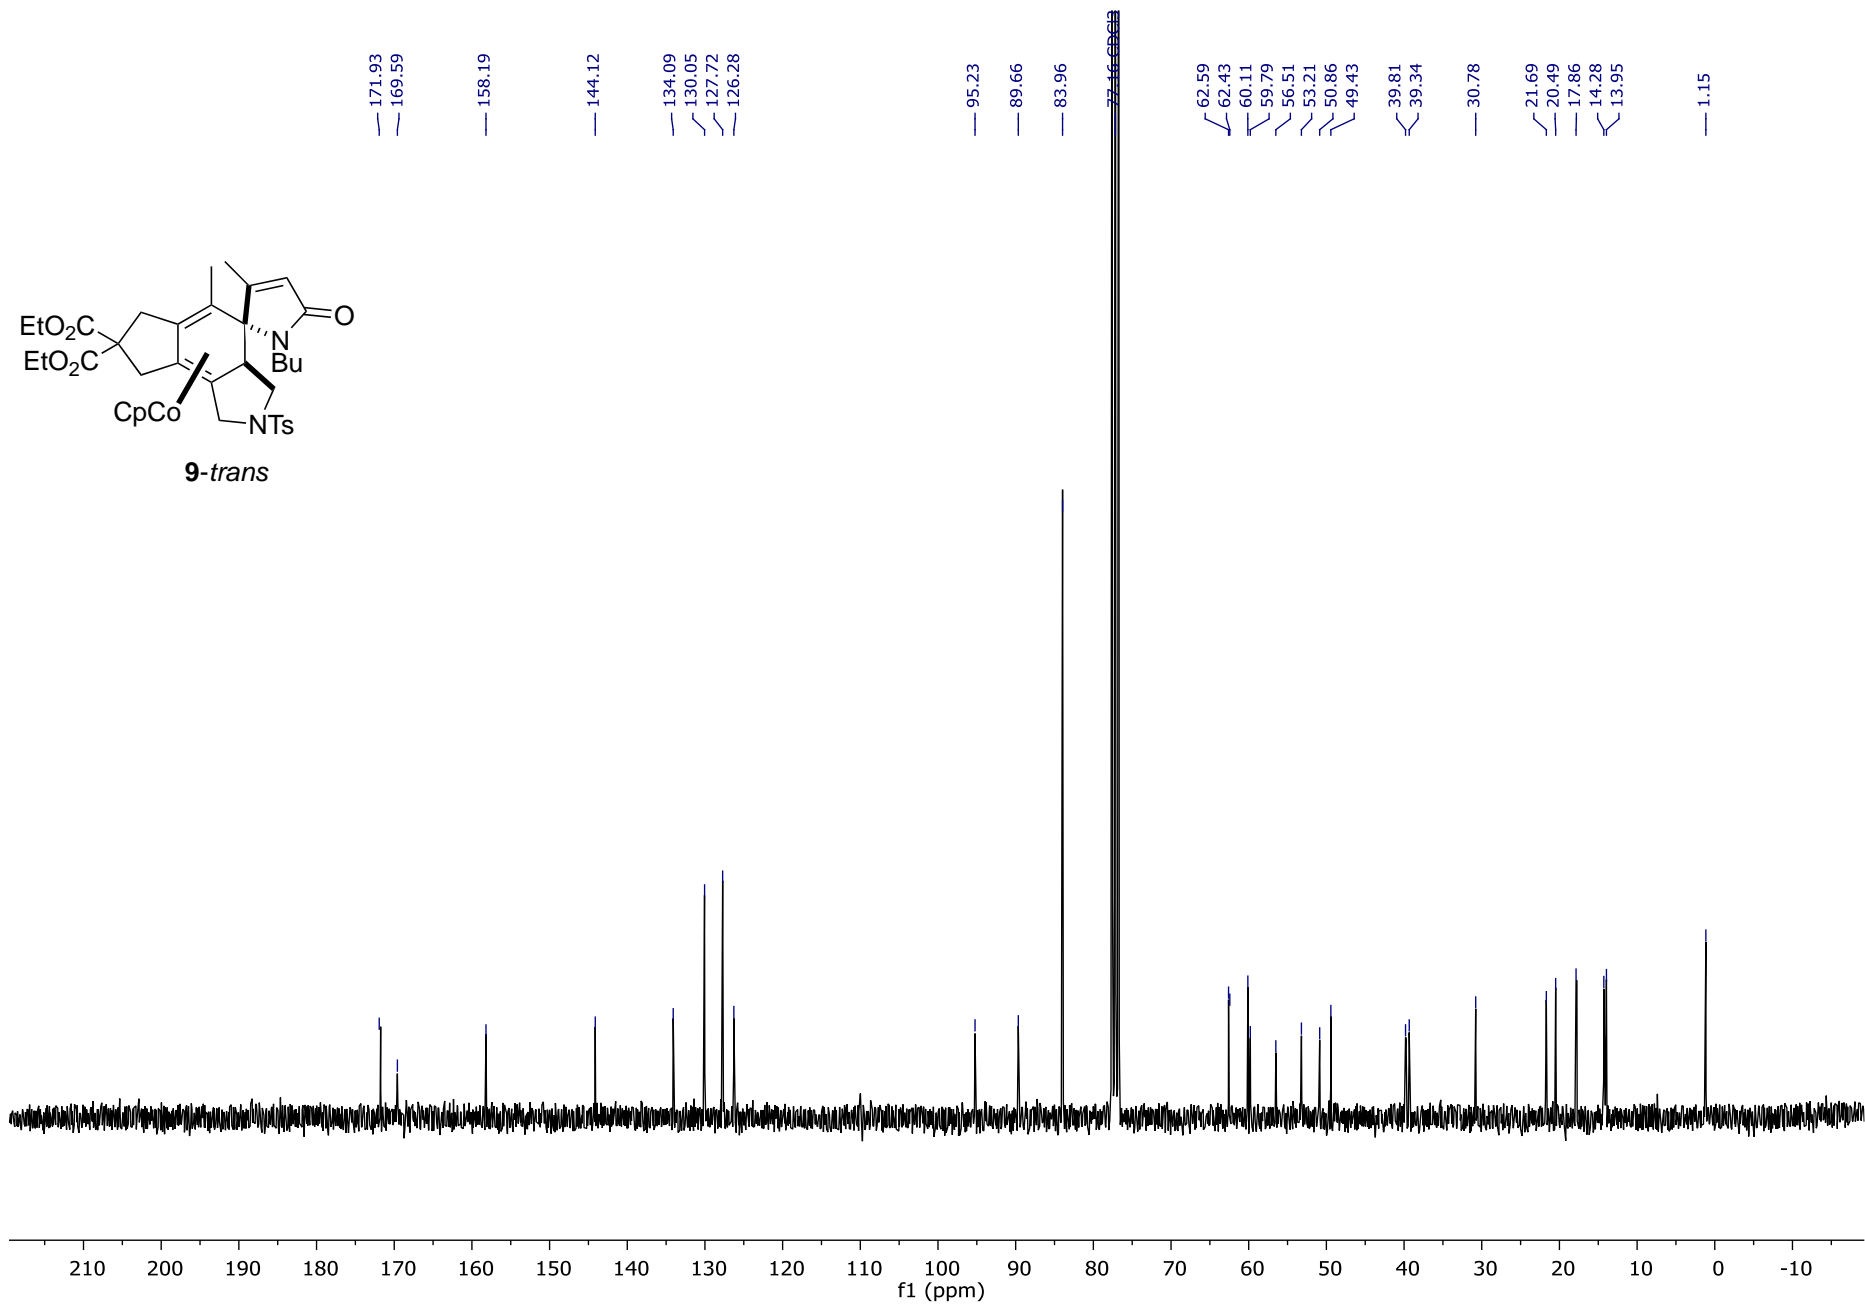

Figure S37. <sup>13</sup>C NMR (75 MHz, CDCl<sub>3</sub>) spectrum

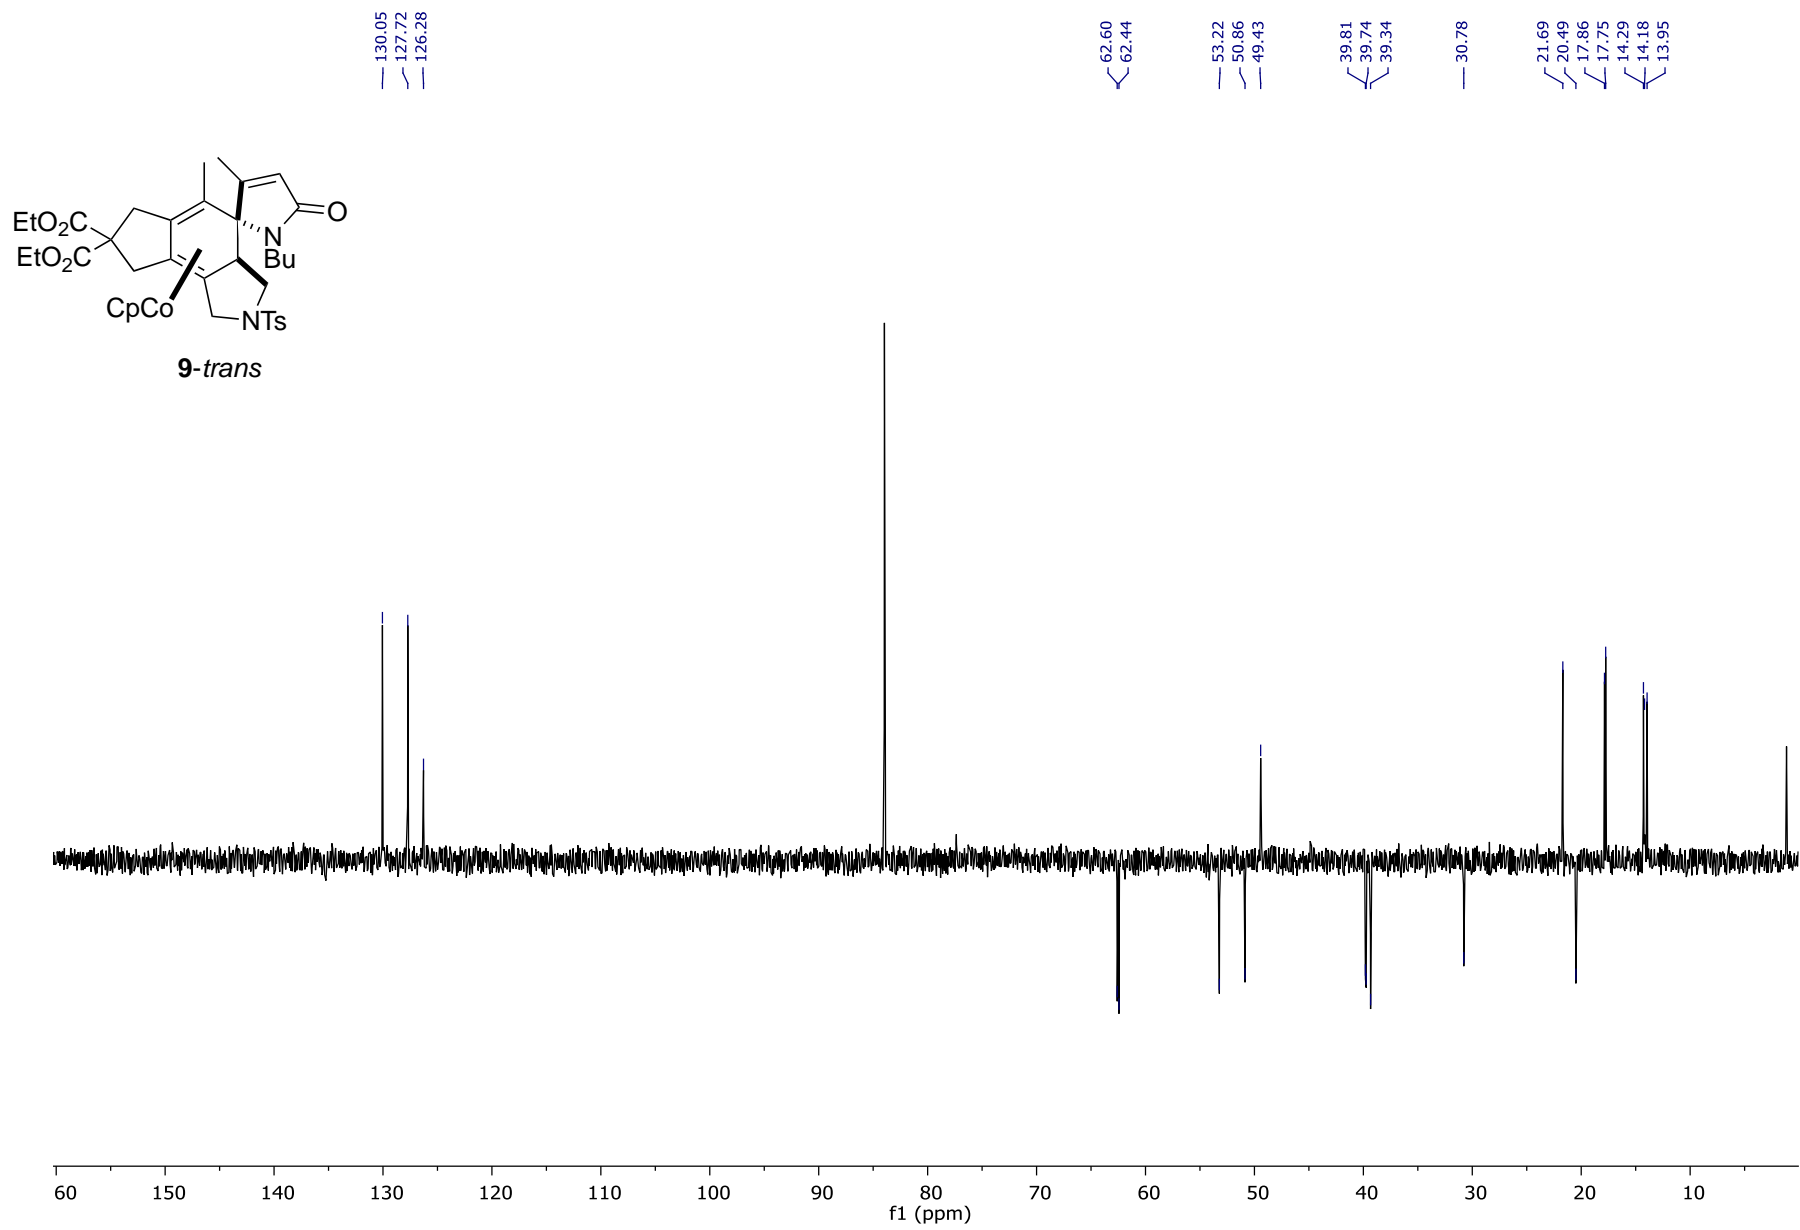

Figure S38. DEPT (75 MHz, CDCl<sub>3</sub>) spectrum

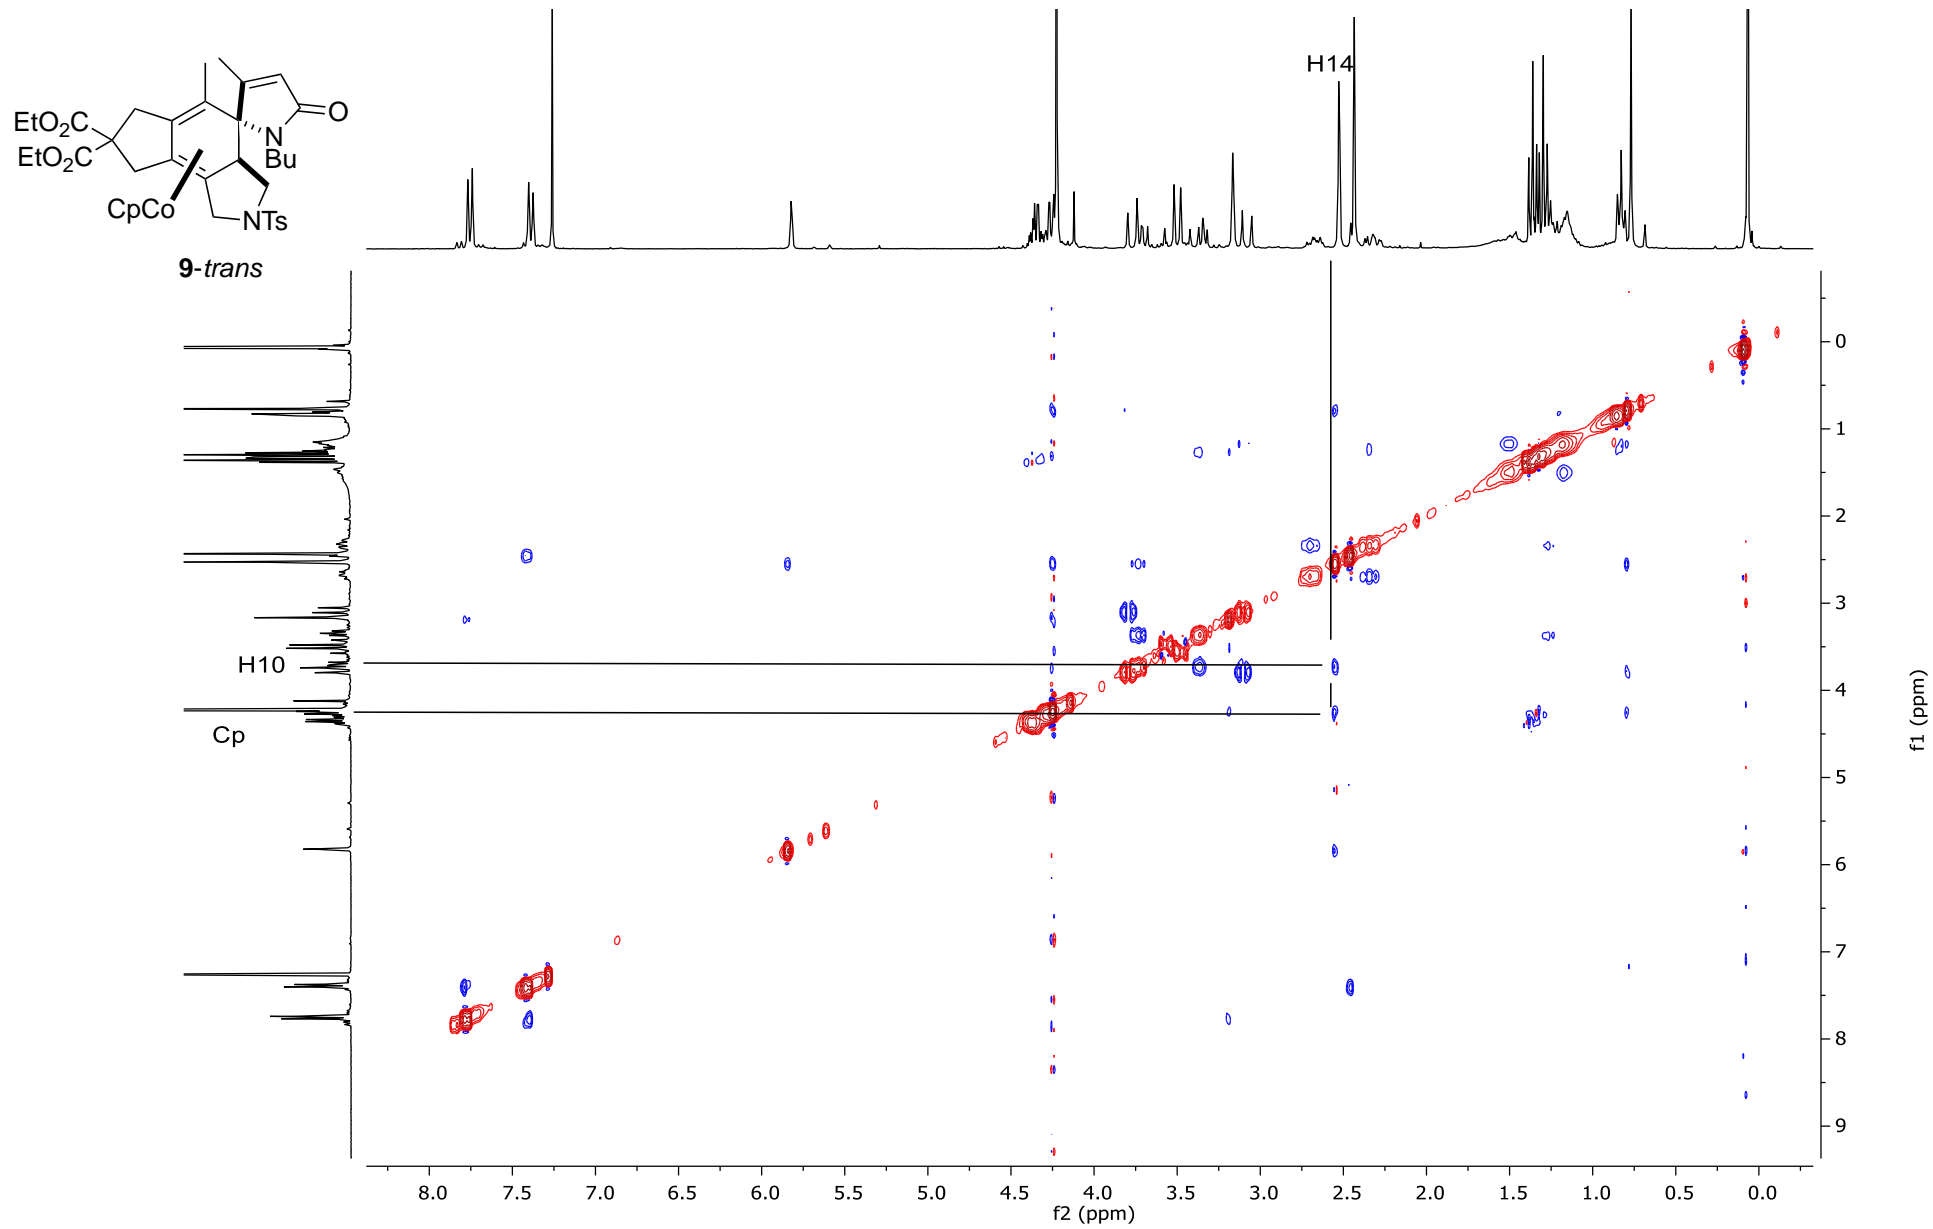

Figure S39. NOESY (CDCl<sub>3</sub>) spectrum

## List of coordinates

In the following we report the coordinates of the computed structures. Optimizations were performed at the TPSS-D3/def2-TZVP level. Solvent effects are added as single point calculations with the COSMO implicit model (toluene).

**Table S2.** List of computed energies. E (a.u., gas phase) is the total electronic energy. ZPE (a.u., gas phase) is the zero-point energy. “Chem. Pot.” (kJ/mol, gas phase) is the chemical potential.  $E_{\text{Toluene}}$  (a.u.) is the total electronic energy obtained by employing the COSMO model for reproducing solvent effects.  $\Delta G$  (kcal/mol) are computed relative free-energies ( $\Delta E_{\text{Toluene}} + \Delta(\text{Chem. Pot.})$ , T=383.15K).

| System                                 | E             | ZPE       | Chem. Pot. | $E_{\text{Toluene}}$ | $\Delta G$ |
|----------------------------------------|---------------|-----------|------------|----------------------|------------|
| <b>Figure 3 Exo approach</b>           |               |           |            |                      |            |
| <b>II<sub>exo</sub></b>                | -2765.815271  | 0.4546728 | 937.52     | -2765.826211         | 0.00       |
| <b>TS<sub>II-IIIexo1</sub></b>         | -2765.7956346 | 0.4524479 | 929.86     | -2765.806506         | 10.53      |
| <b>III<sub>exo1</sub></b>              | -2765.8124604 | 0.4552817 | 941.67     | -2765.823794         | 2.51       |
| <b>TS<sub>III-P2exo</sub></b>          | -2765.794083  | 0.4539583 | 939.92     | -2765.805258         | 13.72      |
| <b>P2<sub>exo</sub></b>                | -2765.8960570 | 0.458963  | 953.88     | -2765.907425         | -47.05     |
| <b>TS<sub>III-IV</sub></b>             | -2765.7884839 | 0.4546732 | 945.57     | -2765.801488         | 17.44      |
| <b>IV</b>                              | -2765.8404165 | 0.457065  | 948.98     | -2765.850328         | -12.39     |
| <b>TS<sub>IV-V</sub></b>               | -2765.8289044 | 0.4565329 | 951.74     | -2765.838736         | -4.46      |
| <b>V</b>                               | -2765.8407002 | 0.4572427 | 952.39     | -2765.850362         | -11.60     |
| <b>TS<sub>V-P1</sub></b>               | -2765.8120904 | 0.4565534 | 959.3      | -2765.824133         | 6.51       |
| <b>TS<sub>II-IIIexo1</sub></b>         | -2765.7956346 | 0.4524479 | 929.86     | -2765.806506         | 10.53      |
| <b>P1<sub>exo</sub></b>                | -2765.8746457 | 0.4593094 | 961.92     | -2765.887025         | -32.33     |
| <b>TS<sub>II-IIIexo2</sub></b>         | -2765.801029  | 0.4540872 | 933.7      | -2765.812373         | 7.77       |
| <b>III<sub>exo2</sub></b>              | -2765.825935  | 0.4558109 | 939.64     | -2765.837578         | -6.63      |
| <b>TS<sub>III-P2exo2</sub></b>         | -2765.790758  | 0.4541399 | 941.66     | -2765.802013         | 16.17      |
| <b>Figure 3 Endo approach</b>          |               |           |            |                      |            |
| <b>II<sub>endo</sub></b>               | -2765.8059    | 0.4546462 | 937.62     | -2765.817732         | 5.3        |
| <b>TS<sub>II-IIIendo2</sub></b>        | -2765.8007    | 0.4538618 | 936.45     | -2765.813037         | 8.0        |
| <b>III<sub>endo2</sub></b>             | -2765.826293  | 0.4560525 | 945.74     | -2765.838281         | -5.6       |
| <b>TS<sub>III-P2endo2</sub></b>        | -2765.787576  | 0.4549764 | 946.99     | -2765.799371         | 19.1       |
| <b>TS<sub>II-IIIendo1</sub></b>        | -2765.787986  | 0.4522329 | 927.39     | -2765.799461         | 14.4       |
| <b>III<sub>endo1</sub></b>             | -2765.806205  | 0.4548385 | 941.99     | -2765.817586         | 6.5        |
| <b>TS<sub>III-P2endo1</sub></b>        | -2765.79766   | 0.4539963 | 944.76     | -2765.809020         | 12.5       |
| <b>P2<sub>endo</sub></b>               | -2765.893745  | 0.4589252 | 956.41     | -2765.905818         | -45.4      |
| <b>Figure 5 Lactam case</b>            |               |           |            |                      |            |
| <b>I<sup>N</sup></b>                   | -2823.361213  | 0.5006682 | 1029.66    | -2823.373231         | 0.0        |
| <b>TS<sup>N</sup><sub>I-II</sub></b>   | -2823.343911  | 0.4991287 | 1018.97    | -2823.357054         | 7.6        |
| <b>II<sup>aN</sup></b>                 | -2823.369751  | 0.5012422 | 1034.18    | -2823.383076         | -5.1       |
| <b><sup>3</sup>II<sup>aN</sup></b>     | -2823.378198  | 0.5008928 | 1033.56    | -2823.391060         | -10.3      |
| <b>TS<sup>N</sup><sub>II</sub></b>     | -2823.367272  | 0.5014843 | 1046.7     | -2823.38046          | -0.5       |
| <b>II<sup>N</sup></b>                  | -2823.402673  | 0.5037944 | 1060.63    | -2823.414563         | -18.5      |
| <b>TS<sup>N</sup><sub>II-III</sub></b> | -2823.395071  | 0.5033413 | 1062.52    | -2823.40751          | -13.7      |

|                                   |              |           |         |              |       |
|-----------------------------------|--------------|-----------|---------|--------------|-------|
| III <sup>N</sup>                  | -2823.40571  | 0.5041444 | 1058.97 | -2823.418728 | -21.5 |
| Ts <sup>N</sup> <sub>III-IV</sub> | -2823.373443 | 0.5023531 | 1060.79 | -2823.387794 | -1.7  |
| IV <sup>N</sup>                   | -2823.417291 | 0.5063455 | 1077.29 | -2823.432685 | -25.9 |
| Ts <sup>N</sup> <sub>IV-V</sub>   | -2823.397252 | 0.5046941 | 1071.09 | -2823.407077 | -11.3 |
| V <sup>N</sup>                    | -2823.40296  | 0.5059212 | 1073.5  | -2823.412483 | -14.2 |
| Ts <sup>N</sup> <sub>V-P1</sub>   | -2823.378837 | 0.5046874 | 1076.83 | -2823.390645 | 0.3   |
| P1 <sup>N</sup>                   | -2823.444015 | 0.5075289 | 1078.26 | -2823.455881 | -40.2 |
| Ts <sup>N</sup> <sub>III-P2</sub> | -2823.37564  | 0.5020332 | 1056.09 | -2823.387679 | -2.7  |
| P2 <sup>N</sup>                   | -2823.475736 | 0.5071147 | 1074.08 | -2823.488052 | -61.4 |

| Figure 5                          | Lactone case |          |         |              |       |
|-----------------------------------|--------------|----------|---------|--------------|-------|
| I <sup>O</sup>                    | -2843.236305 | 0.488355 | 999.53  | -2843.247126 | 0.0   |
| Ts <sup>O</sup> <sub>I-II</sub>   | -2843.224289 | 0.487791 | 1000.64 | -2843.235853 | 7.3   |
| IIa <sup>O</sup>                  | -2843.258288 | 0.489679 | 1017.13 | -2843.268758 | -9.4  |
| Ts <sup>O</sup> <sub>II</sub>     | -2843.242970 | 0.489706 | 1022.57 | -2843.253098 | 1.8   |
| II <sup>O</sup>                   | -2843.281711 | 0.491502 | 1030.33 | -2843.292266 | -21.0 |
| Ts <sup>O</sup> <sub>II-III</sub> | -2843.274674 | 0.490941 | 1030.85 | -2843.285881 | -16.8 |
| III <sup>O</sup>                  | -2843.286613 | 0.491564 | 1024.19 | -2843.298556 | -26.4 |
| Ts <sup>O</sup> <sub>III-IV</sub> | -2843.254316 | 0.490437 | 1033.11 | -2843.267276 | -4.6  |
| IV <sup>O</sup>                   | -2843.306681 | 0.493364 | 1042.21 | -2843.316289 | -33.2 |
| Ts <sup>O</sup> <sub>IV-V</sub>   | -2843.292859 | 0.492386 | 1041.91 | -2843.302186 | -24.4 |
| V <sup>O</sup>                    | -2843.297224 | 0.493426 | 1037.86 | -2843.306773 | -28.3 |
| Ts <sup>O</sup> <sub>V-P1</sub>   | -2843.273323 | 0.492442 | 1045.44 | -2843.285225 | -12.9 |
| P1 <sup>O</sup>                   | -2843.336703 | 0.495049 | 1046.26 | -2843.348521 | -52.5 |
| Ts <sup>O</sup> <sub>III-P2</sub> | -2843.251196 | 0.489407 | 1024.49 | -2843.262136 | -3.5  |
| P2 <sup>O</sup>                   | -2843.354146 | 0.494858 | 1044.2  | -2843.365445 | -63.6 |

## List of coordinates

|                          |            |            |            |            |            |            |            |
|--------------------------|------------|------------|------------|------------|------------|------------|------------|
| II <sub>exo</sub>        | H          | -3.5880667 | -1.0966967 | -1.4922623 |            |            |            |
| 58                       | C          | -1.2713653 | -2.9134523 | 0.9787250  |            |            |            |
| Energy = -2765.815270997 | H          | -1.8579282 | -2.1508917 | 1.4789021  |            |            |            |
| C                        | 1.1669443  | 1.6540484  | -0.8094473 | C          | 0.1277203  | -2.8614012 | 1.1451194  |
| C                        | -1.3002021 | 1.9061576  | -0.6632843 | C          | 0.8594858  | -1.9132330 | 1.9904696  |
| C                        | -0.9311169 | 0.4363799  | -0.6569541 | O          | 0.8975187  | -4.0257456 | 1.0255112  |
| C                        | 0.5080243  | 0.2909208  | -0.7371427 | C          | 2.0417586  | -2.4897556 | 2.3128175  |
| C                        | -1.6585498 | -0.6980689 | -0.5996396 | C          | 2.1191845  | -3.8158142 | 1.7119175  |
| C                        | 0.9997252  | -0.9621661 | -0.7306524 | H          | 2.8330816  | -2.0857215 | 2.9293810  |
| H                        | 1.4234636  | 1.9082507  | -1.8464942 | C          | 0.2731231  | -0.6338251 | 2.4802033  |
| H                        | 2.0650867  | 1.7555879  | -0.1962883 | H          | -0.4011388 | -0.2089660 | 1.7322785  |
| H                        | -2.0996591 | 2.1798296  | 0.0287302  | H          | -0.3090210 | -0.8277193 | 3.3917786  |
| H                        | -1.5991689 | 2.2372231  | -1.6651879 | H          | 1.0473277  | 0.0980256  | 2.7147750  |
| Co                       | -0.5030947 | -2.2991915 | -0.7891696 | C          | 2.4426155  | -1.3386576 | -0.8410292 |
| C                        | 0.5382342  | -3.6317774 | -2.0724636 | H          | 2.7190044  | -1.5734437 | -1.8796065 |
| H                        | 1.5550312  | -3.9531164 | -1.9005917 | H          | 3.0883748  | -0.5160718 | -0.5058139 |
| C                        | -0.6264129 | -4.2725889 | -1.5900546 | H          | 2.6923329  | -2.2206682 | -0.2427872 |
| H                        | -0.6361164 | -5.1578523 | -0.9693471 | O          | 2.9739925  | -4.6701265 | 1.7165099  |
| C                        | -1.7664884 | -3.4980934 | -1.9712588 | C          | 0.0414233  | 2.6215063  | -0.3074116 |
| H                        | -2.7977245 | -3.7147072 | -1.7298820 | C          | 0.1658274  | 3.9684465  | -1.0233527 |
| C                        | 0.1255110  | -2.4463654 | -2.7671302 | O          | -0.3947243 | 4.2696284  | -2.0554984 |
| H                        | 0.7698163  | -1.7314975 | -3.2570943 | O          | 1.0498362  | 4.7752119  | -0.3872603 |
| C                        | -1.2977783 | -2.3741067 | -2.7152614 | C          | 0.1834940  | 2.8409125  | 1.2031265  |
| H                        | -1.9022831 | -1.5886521 | -3.1442640 | O          | 1.1100276  | 2.4805741  | 1.8973870  |
| C                        | -3.1558965 | -0.7607420 | -0.5384668 | O          | -0.8890250 | 3.5173496  | 1.6877549  |
| H                        | -3.5848312 | 0.2260972  | -0.3174783 | C          | 1.2833225  | 6.0553104  | -1.0289834 |

|   |            |            |            |
|---|------------|------------|------------|
| H | 2.0054323  | 6.5638831  | -0.3910403 |
| H | 1.6849073  | 5.9020585  | -2.0337178 |
| H | 0.3480512  | 6.6170250  | -1.0925049 |
| C | -0.8290874 | 3.8112684  | 3.1055365  |
| H | 0.0539235  | 4.4171487  | 3.3241826  |
| H | -1.7457019 | 4.3596281  | 3.3214246  |
| H | -0.7830077 | 2.8821055  | 3.6795239  |
| H | -3.5141667 | -1.4628179 | 0.2242171  |
| H | -1.7510466 | -3.8806441 | 0.8685500  |

**TSII-IIIexo1**

58

Energy = -2765.795634552

|    |            |            |            |
|----|------------|------------|------------|
| C  | 0.7957647  | 1.6516928  | 0.6123458  |
| C  | -1.1581476 | 1.9802117  | -0.9401244 |
| C  | -0.7208165 | 0.5323551  | -0.8867524 |
| C  | 0.3226604  | 0.3481556  | 0.0322304  |
| C  | -1.1127764 | -0.6085353 | -1.5732745 |
| C  | 0.7629841  | -0.9694270 | 0.2268643  |
| H  | 1.8755124  | 1.8018838  | 0.5095415  |
| H  | 0.5708134  | 1.7301874  | 1.6834133  |
| H  | -2.1191067 | 2.1380394  | -0.4326236 |
| H  | -1.2496752 | 2.3754882  | -1.9547387 |
| Co | -0.1973533 | -2.1575145 | -1.0441356 |
| C  | 1.0444146  | -3.8831967 | -1.0478343 |
| H  | 1.5565695  | -4.2720042 | -0.1795013 |
| C  | -0.2565714 | -4.2499148 | -1.4800979 |
| H  | -0.9015765 | -4.9621906 | -0.9825792 |
| C  | -0.6040147 | -3.4856501 | -2.6293570 |
| H  | -1.5306398 | -3.5456955 | -3.1825668 |
| C  | 1.5196364  | -2.8672309 | -1.9387629 |
| H  | 2.4722541  | -2.3595348 | -1.8780741 |
| C  | 0.5063854  | -2.6233011 | -2.9159703 |
| H  | 0.5675175  | -1.9041024 | -3.7215693 |
| C  | -2.1952574 | -0.5741233 | -2.6121792 |
| H  | -2.6285076 | 0.4258549  | -2.7464631 |
| H  | -1.8177425 | -0.9138327 | -3.5845176 |
| C  | -1.5589565 | -2.3371047 | 0.4638625  |
| H  | -2.4180610 | -1.6781766 | 0.3650396  |
| C  | -0.6314745 | -1.9431914 | 1.4960517  |
| C  | -0.7824136 | -0.8943635 | 2.5120195  |
| O  | 0.1675787  | -2.9381389 | 2.0235486  |
| C  | 0.0167650  | -1.2244622 | 3.5616210  |
| C  | 0.6350826  | -2.5148419 | 3.3089252  |
| H  | 0.1739932  | -0.6722747 | 4.4781904  |
| C  | -1.7586778 | 0.2306304  | 2.4106577  |
| H  | -1.9022763 | 0.5415261  | 1.3742755  |
| H  | -2.7338362 | -0.1040821 | 2.7886037  |
| H  | -1.4434588 | 1.0963005  | 2.9979102  |
| C  | 2.0782759  | -1.2165729 | 0.9079953  |
| H  | 2.8719257  | -0.7099575 | 0.3415026  |
| H  | 2.1012709  | -0.8007735 | 1.9285086  |
| H  | 2.3283028  | -2.2759444 | 0.9690778  |
| O  | 1.3791533  | -3.2205127 | 3.9446809  |
| C  | -0.0138669 | 2.7372317  | -0.1744525 |
| C  | 0.9088127  | 3.4478893  | -1.1712854 |
| O  | 0.8493154  | 3.3839757  | -2.3793967 |
| O  | 1.8549469  | 4.1537142  | -0.5012412 |
| C  | -0.6341624 | 3.7672924  | 0.7692003  |
| O  | -0.7735979 | 3.6432434  | 1.9681088  |
| O  | -1.0852932 | 4.8347001  | 0.0680424  |
| C  | 2.7975367  | 4.8635165  | -1.3445279 |
| H  | 3.4689782  | 5.3723621  | -0.6535401 |
| H  | 3.3432881  | 4.1564880  | -1.9744188 |
| H  | 2.2660776  | 5.5790960  | -1.9769320 |
| C  | -1.7465554 | 5.8549558  | 0.8602203  |
| H  | -1.0568663 | 6.2488469  | 1.6107601  |
| H  | -2.0331626 | 6.6261068  | 0.1460292  |
| H  | -2.6238319 | 5.4328795  | 1.3568702  |
| H  | -3.0018083 | -1.2676404 | -2.3393083 |

|   |            |            |           |
|---|------------|------------|-----------|
| H | -1.8439508 | -3.3862626 | 0.5130920 |
|---|------------|------------|-----------|

**IIIexo1**

58

Energy = -2765.812460444

|    |            |            |            |
|----|------------|------------|------------|
| C  | 0.8223138  | 1.2436800  | 0.7630653  |
| C  | -1.5965963 | 1.5291666  | 0.3108823  |
| C  | -1.1675643 | 0.1194214  | 0.0082450  |
| C  | 0.1736770  | -0.1276440 | 0.5888706  |
| C  | -1.3374153 | -0.7036418 | -1.0307220 |
| C  | 0.7204419  | -1.3163085 | -1.0972472 |
| H  | 1.8005740  | 1.3539272  | 0.2937374  |
| H  | 0.9424907  | 1.4594785  | 1.8318901  |
| H  | -1.9557675 | 1.6583899  | 1.3404273  |
| H  | -2.3266447 | 1.9363394  | -0.3892296 |
| Co | 0.3814814  | -1.5759881 | -0.9655126 |
| C  | 2.4024899  | -1.9668232 | -1.5189968 |
| H  | 3.2135632  | -2.1476149 | -0.8276408 |
| C  | 1.5417711  | -2.9462271 | -2.0605216 |
| H  | 1.5716201  | -4.0050467 | -1.8440133 |
| C  | 0.5652566  | -2.2790889 | -2.8734234 |
| H  | -0.2392356 | -2.7504156 | -3.4212906 |
| C  | 1.9973359  | -0.6808688 | -2.0276392 |
| H  | 2.4544122  | 0.2690092  | -1.7844449 |
| C  | 0.8856117  | -0.8739298 | -2.8762189 |
| H  | 0.3326317  | -0.0946846 | -3.3828559 |
| C  | -2.4179023 | -0.7842945 | -2.0482621 |
| H  | -3.2611460 | -0.1281786 | -1.7974393 |
| H  | -2.0416743 | -0.4889326 | -3.0350685 |
| C  | -0.6709192 | -2.9538091 | 0.0189066  |
| H  | -1.7559517 | -2.8680972 | -0.0645438 |
| C  | -0.1284495 | -2.5767776 | 1.3941204  |
| C  | -1.1059195 | -2.4555303 | 2.5515964  |
| O  | 0.7808460  | -3.6341646 | 1.8240873  |
| C  | -0.7750923 | -3.3520523 | 3.4928150  |
| C  | 0.4103317  | -4.1090803 | 3.0693760  |
| H  | -1.2718256 | -3.5380821 | 4.4370582  |
| C  | -2.2287690 | -1.4758513 | 2.5801658  |
| H  | -1.8377371 | -0.4528860 | 2.6324763  |
| H  | -2.8245454 | -1.5325183 | 1.6630115  |
| H  | -2.8739954 | -1.6470276 | 3.4458737  |
| C  | 2.0964312  | -1.2645009 | 1.7245263  |
| H  | 2.6986167  | -0.4625717 | 1.2915466  |
| H  | 2.0033806  | -1.0759720 | 2.8037011  |
| H  | 2.6237565  | -2.2111728 | 1.6069959  |
| O  | 1.0211450  | -4.9957224 | 3.6213912  |
| C  | -0.2075540 | 2.2517102  | 0.1704663  |
| C  | 0.0694726  | 2.5201864  | -1.3149032 |
| O  | -0.7109460 | 2.3741488  | -2.2301566 |
| O  | 1.3458548  | 2.9537822  | -1.4847492 |
| C  | -0.2195485 | 3.5637712  | 0.9527396  |
| O  | 0.0703859  | 3.6789080  | 2.1249455  |
| O  | -0.6731866 | 4.5827696  | 0.1857116  |
| C  | 1.6971885  | 3.2866886  | -2.8517945 |
| H  | 2.7239855  | 3.6477885  | -2.8013764 |
| H  | 1.6259476  | 2.3987327  | -3.4851292 |
| H  | 1.0245067  | 4.0595427  | -3.2314483 |
| C  | -0.7843419 | 5.8607006  | 0.8658613  |
| H  | 0.1948837  | 6.1699934  | 1.2392580  |
| H  | -1.1538917 | 6.5518822  | 0.1092556  |
| H  | -1.4843770 | 5.7791041  | 1.7008749  |
| H  | -2.7914960 | -1.8123581 | -2.1423156 |
| H  | -0.3499114 | -3.9612591 | -0.2514299 |

**TSIII-P2exo1**

58

Energy = -2765.794083141

|   |            |           |           |
|---|------------|-----------|-----------|
| C | 1.1347005  | 1.2081213 | 0.8334986 |
| C | -1.2650624 | 1.6780368 | 1.2368219 |
| C | -1.1024351 | 0.3357427 | 0.5907371 |

|    |            |            |            |
|----|------------|------------|------------|
| C  | 0.3195558  | -0.0385439 | 0.5274702  |
| C  | -1.7724708 | -0.3524935 | -0.3667450 |
| C  | 0.8030466  | -1.3757817 | 0.4642645  |
| H  | 1.9491218  | 1.4023947  | 0.1339825  |
| H  | 1.5688124  | 1.1438482  | 1.8393470  |
| H  | -1.3022708 | 1.6082562  | 2.3340037  |
| H  | -2.1225906 | 2.2521208  | 0.8830266  |
| Co | -0.1278850 | -0.9158469 | -1.2525060 |
| C  | 1.4897476  | -1.0916138 | -2.5701472 |
| H  | 2.4870643  | -1.3716291 | -2.2578934 |
| C  | 0.4723764  | -1.9864136 | -2.9981343 |
| H  | 0.5479063  | -3.0637809 | -3.0489017 |
| C  | -0.6897647 | -1.1975763 | -3.2366702 |
| H  | -1.6603666 | -1.5702718 | -3.5393209 |
| C  | 0.9943414  | 0.2622036  | -2.6653282 |
| H  | 1.5542235  | 1.1522951  | -2.4131901 |
| C  | -0.3472037 | 0.2002239  | -3.0752732 |
| H  | -1.0213695 | 1.0378904  | -3.1887071 |
| C  | -3.1565532 | -0.1389561 | -0.8890566 |
| H  | -3.8956949 | -0.1088188 | -0.0780083 |
| H  | -3.1957783 | 0.8222655  | -1.4149731 |
| C  | -1.3635005 | -2.2272385 | -0.1739759 |
| H  | -2.3337311 | -2.2752403 | 0.3278599  |
| C  | -0.1869765 | -2.5098883 | 0.7716834  |
| C  | -0.5014952 | -2.7221965 | 2.2423715  |
| O  | 0.4137753  | -3.7720217 | 0.3589482  |
| C  | -0.0992161 | -3.9511876 | 2.5976753  |
| C  | 0.4806034  | -4.6413919 | 1.4359868  |
| H  | -0.1659746 | -4.4196604 | 3.5719017  |
| C  | -1.1291108 | -1.6703015 | 3.0913520  |
| H  | -0.4603047 | -0.8054006 | 3.1797351  |
| H  | -2.0539509 | -1.2985206 | 2.6344199  |
| H  | -1.3469466 | -2.0499686 | 4.0928315  |
| C  | 2.2733814  | -1.6684460 | 0.6304230  |
| H  | 2.8800198  | -0.8350346 | 0.2667133  |
| H  | 2.5145098  | -1.8240652 | 1.6922007  |
| H  | 2.5572756  | -2.5744913 | 0.0915024  |
| O  | 0.9521791  | -5.7497837 | 1.3306449  |
| C  | 0.0877836  | 2.3634410  | 0.8277812  |
| C  | -0.0702047 | 2.9733661  | -0.5707535 |
| O  | -1.0948718 | 3.0295007  | -1.2159163 |
| O  | 1.1166999  | 3.4653730  | -1.0079486 |
| C  | 0.4455284  | 3.4531652  | 1.8370308  |
| O  | 1.1311112  | 3.2958734  | 2.8250245  |
| O  | -0.1731271 | 4.6178203  | 1.5285674  |
| C  | 1.0593436  | 4.1352416  | -2.2937427 |
| H  | 2.0780134  | 4.4718321  | -2.4838621 |
| H  | 0.7250113  | 3.4396799  | -3.0672648 |
| H  | 0.3680431  | 4.9799259  | -2.2398138 |
| C  | 0.0529695  | 5.7002842  | 2.4690370  |
| H  | 1.1202855  | 5.9276452  | 2.5253618  |
| H  | -0.5088155 | 6.5437732  | 2.0693558  |
| H  | -0.3123988 | 5.4170594  | 3.4591723  |
| H  | -3.4494030 | -0.9252752 | -1.5906038 |
| H  | -1.3817303 | -2.9507023 | -0.9915859 |

### P2<sub>exo</sub>

58

Energy = -2765.896056973

|    |            |            |            |
|----|------------|------------|------------|
| C  | 0.9799178  | 0.9591930  | 0.9238883  |
| C  | -1.3501121 | 1.4852341  | 0.1722130  |
| C  | -1.0609398 | 0.0128275  | 0.0470640  |
| C  | 0.2616680  | -0.2869702 | 0.4792970  |
| C  | -1.8068611 | -1.0948509 | -0.4653415 |
| C  | 0.6709129  | -1.6554267 | 0.3485302  |
| H  | 1.9930847  | 1.0546702  | 0.5320553  |
| H  | 1.0370125  | 0.9955559  | 2.0187535  |
| H  | -2.0107092 | 1.6573455  | 1.0325654  |
| H  | -1.8103333 | 1.9372316  | -0.7082289 |
| Co | -0.0113329 | -0.8608345 | -1.3851563 |

|   |            |            |            |
|---|------------|------------|------------|
| C | 1.5467642  | -1.3699047 | -2.6050737 |
| H | 2.4717807  | -1.8066726 | -2.2543710 |
| C | 0.3665769  | -2.1010247 | -2.9672298 |
| H | 0.2484995  | -3.1751324 | -2.9476379 |
| C | -0.6256895 | -1.1344933 | -3.3167606 |
| H | -1.6460808 | -1.3530739 | -3.6011589 |
| C | 1.2878788  | 0.0280993  | -2.7595871 |
| H | 1.9870932  | 0.8258023  | -2.5508145 |
| C | -0.0603319 | 0.1777640  | -3.1930716 |
| H | -0.5717282 | 1.1150093  | -3.3601512 |
| C | -3.1164574 | -0.8389072 | -1.1765286 |
| H | -3.9388923 | -0.7306592 | -0.4529528 |
| H | -3.0750874 | 0.0731499  | -1.7788907 |
| C | -1.7451817 | -2.4171901 | 0.2823688  |
| H | -2.4840511 | -2.4342342 | 1.1004364  |
| C | -0.3308712 | -2.7277813 | 0.8102537  |
| C | -0.2744339 | -2.9476902 | 2.3112072  |
| O | 0.0939658  | -4.0137166 | 0.2612171  |
| C | 0.1474137  | -4.1960722 | 2.5588904  |
| C | 0.3904688  | -4.8950165 | 1.2868619  |
| H | 0.3074686  | -4.6712695 | 3.5186617  |
| C | -0.6129317 | -1.8590208 | 3.2732590  |
| H | 0.1278765  | -1.0524434 | 3.2105016  |
| H | -1.5831418 | -1.4075623 | 3.0337347  |
| H | -0.6380234 | -2.2281897 | 4.3012852  |
| C | 2.1274650  | -2.0111284 | 0.5551662  |
| H | 2.7751174  | -1.2112992 | 0.1867297  |
| H | 2.3509835  | -2.1650246 | 1.6208371  |
| H | 2.3816640  | -2.9356151 | 0.0311943  |
| O | 0.7790050  | -6.0203695 | 1.0697142  |
| C | 0.0585632  | 2.1247708  | 0.4359090  |
| C | 0.5731317  | 2.8003154  | -0.8412475 |
| O | -0.0886405 | 3.0842761  | -1.8166084 |
| O | 1.8927516  | 3.0954617  | -0.7268601 |
| C | -0.0867901 | 3.1865779  | 1.5339801  |
| O | -0.0503956 | 2.9583160  | 2.7248260  |
| O | -0.3295602 | 4.4094285  | 1.0113138  |
| C | 2.4443072  | 3.8427334  | -1.8409390 |
| H | 3.4962335  | 3.9843885  | -1.5949367 |
| H | 2.3296849  | 3.2780564  | -2.7695394 |
| H | 1.9277552  | 4.8012633  | -1.9347398 |
| C | -0.5492831 | 5.4626993  | 1.9867663  |
| H | 0.3332186  | 5.5720483  | 2.6216019  |
| H | -0.7245798 | 6.3611457  | 1.3962854  |
| H | -1.4170211 | 5.2218410  | 2.6055306  |
| H | -3.3740463 | -1.6751489 | -1.8351438 |
| H | -2.0147559 | -3.2284821 | -0.3999293 |

### Tsm-iv

58

Energy = -2765.788483876

|    |            |            |            |
|----|------------|------------|------------|
| C  | -0.9421181 | 1.6963721  | 1.2176123  |
| C  | -0.3779544 | 1.8146859  | -1.1975526 |
| C  | -0.6868120 | 0.3715220  | -0.8132616 |
| C  | -0.8058949 | 0.3070934  | 0.6418457  |
| C  | -0.7903460 | -0.6407562 | -1.8090581 |
| C  | -0.4649646 | -0.8581628 | 1.2753723  |
| H  | -0.4447326 | 1.8215680  | 2.1811546  |
| H  | -2.0034709 | 1.9406059  | 1.3561355  |
| H  | -1.1545989 | 2.1852500  | -1.8776508 |
| H  | 0.5842242  | 1.9332846  | -1.7007560 |
| Co | 0.5801338  | -1.2412906 | -0.3939636 |
| C  | 2.0964268  | -2.4175788 | 0.3092957  |
| H  | 1.9414047  | -3.2039341 | 1.0355898  |
| C  | 2.0127888  | -2.5589639 | -1.1101017 |
| H  | 1.7320039  | -3.4587797 | -1.6370825 |
| C  | 2.2569326  | -1.2781901 | -1.6762035 |
| H  | 2.2197723  | -1.0382233 | -2.7302837 |
| C  | 2.4926099  | -1.0550072 | 0.5906599  |
| H  | 2.6329717  | -0.6369962 | 1.5780175  |



|   |            |            |            |
|---|------------|------------|------------|
| C | 2.5922588  | -0.3567411 | -0.6219408 |
| H | 2.8008633  | 0.6972369  | -0.7390750 |
| C | -0.4769568 | -0.2547107 | -3.2396551 |
| H | -1.3867110 | 0.1228030  | -3.7309692 |
| H | 0.2925198  | 0.5160081  | -3.3195765 |
| C | -1.5705740 | -1.9406225 | -1.6667321 |
| H | -2.6628232 | -1.8031382 | -1.6215758 |
| C | -0.9711966 | -2.5731060 | -0.4366413 |
| C | -1.6566078 | -2.4385286 | 0.8879652  |
| O | -0.5337026 | -3.8893138 | -0.5582393 |
| C | -1.3457750 | -3.6074560 | 1.5887672  |
| C | -0.6344581 | -4.5189586 | 0.7511439  |
| H | -1.6714500 | -3.8726925 | 2.5853500  |
| C | -3.0007311 | -1.7567357 | 1.0677494  |
| H | -3.0834653 | -0.8405652 | 0.4776205  |
| H | -3.7981442 | -2.4480555 | 0.7665093  |
| H | -3.1610525 | -1.5019612 | 2.1203603  |
| C | -0.0764660 | -0.9856971 | 2.7103832  |
| H | 0.6856170  | -0.2462097 | 2.9923247  |
| H | -0.9439285 | -0.8398925 | 3.3684505  |
| H | 0.3124924  | -1.9910530 | 2.9057944  |
| O | -0.1777621 | -5.6338309 | 0.8947836  |
| C | -0.3622903 | 2.6366184  | 0.1283881  |
| C | 1.0660855  | 3.0767893  | 0.4762700  |
| O | 2.0599675  | 2.8915941  | -0.1938834 |
| O | 1.0773437  | 3.7211582  | 1.6661391  |
| C | -1.2313406 | 3.8884699  | -0.0475281 |
| O | -2.3853104 | 4.0005844  | 0.3038424  |
| O | -0.5485837 | 4.8455510  | -0.7177686 |
| C | 2.3774633  | 4.2147088  | 2.0827891  |
| H | 2.2005428  | 4.7050636  | 3.0392948  |
| H | 3.0764738  | 3.3816667  | 2.1905045  |
| H | 2.7613258  | 4.9198681  | 1.3416135  |
| C | -1.2981091 | 6.0601847  | -0.9887228 |
| H | -1.6247775 | 6.5123298  | -0.0492868 |
| H | -0.6015248 | 6.7093764  | -1.5177692 |
| H | -2.1695876 | 5.8301069  | -1.6063681 |
| H | -0.1463991 | -1.1314847 | -3.8042179 |
| H | -1.3494788 | -2.5758404 | -2.5288585 |

**IV**  
58

Energy = -2765.840416541

|    |            |            |            |
|----|------------|------------|------------|
| C  | 1.1888742  | 1.1644311  | -0.7219996 |
| C  | 2.2251226  | 0.1084595  | -0.2295492 |
| C  | 1.5480294  | -1.2687976 | -0.4777596 |
| C  | 0.0705559  | -0.9650240 | -0.5737064 |
| C  | -0.1408295 | 0.4398703  | -0.6972403 |
| C  | -1.0275431 | -1.8746190 | -0.4207279 |
| C  | -1.4592590 | 1.0165702  | -0.6657169 |
| H  | 1.2315460  | 2.0573585  | -0.0978261 |
| H  | 1.4087091  | 1.4579095  | -1.7573802 |
| H  | 1.9020329  | -1.6662882 | -1.4375284 |
| H  | 1.8044909  | -1.9913231 | 0.2969916  |
| Co | -1.1026379 | -0.2917062 | 0.8808683  |
| C  | -2.0913814 | 0.8107072  | 2.2996692  |
| H  | -2.6418057 | 1.7148665  | 2.0818314  |
| C  | -2.6230339 | -0.5138068 | 2.2379675  |
| H  | -3.6366106 | -0.7889238 | 1.9824573  |
| C  | -1.5445589 | -1.4043237 | 2.5485414  |
| H  | -1.6060475 | -2.4834766 | 2.5615486  |
| C  | -0.7064333 | 0.7410636  | 2.6602704  |
| H  | -0.0262969 | 1.5748450  | 2.7604996  |
| C  | -0.3703965 | -0.6333324 | 2.8175937  |
| H  | 0.6016932  | -1.0327409 | 3.0712660  |
| C  | -2.2049823 | -1.9423362 | -1.3956815 |
| H  | -1.8493816 | -2.0603973 | -2.4302913 |
| C  | -3.1079582 | -0.7409013 | -1.3014163 |
| C  | -2.5735628 | 0.6247881  | -1.7036712 |
| O  | -4.2627736 | -0.8547043 | -0.9075482 |

|   |            |            |            |
|---|------------|------------|------------|
| C | -3.7472907 | 1.5680530  | -1.6830844 |
| C | -4.9648046 | 1.2836749  | -1.2332519 |
| H | -3.6338413 | 2.5725809  | -2.0788213 |
| C | -1.9541434 | 0.5919103  | -3.1262818 |
| H | -1.0842479 | -0.0712511 | -3.1624077 |
| H | -2.6935440 | 0.2664652  | -3.8649838 |
| H | -1.6214154 | 1.5994483  | -3.3961315 |
| C | -1.4894193 | 2.4941260  | -0.3019890 |
| H | -0.7466951 | 2.7208025  | 0.4664086  |
| H | -1.2744629 | 3.1222018  | -1.1803361 |
| H | -2.4748374 | 2.7841030  | 0.0676968  |
| O | -6.0913676 | 1.3088559  | -0.8997323 |
| C | 3.5092753  | 0.2410284  | -1.0584539 |
| C | 2.5609566  | 0.3572827  | 1.2463666  |
| O | 4.3937139  | 1.0775930  | -0.4697139 |
| O | 3.2041994  | -0.7131994 | 1.7778700  |
| O | 2.3372570  | 1.3738001  | 1.8680180  |
| O | 3.6951975  | -0.2867190 | -2.1344704 |
| C | 5.6135034  | 1.3114074  | -1.2223444 |
| H | 5.3739203  | 1.7584649  | -2.1900993 |
| H | 6.1972873  | 1.9950506  | -0.6071319 |
| H | 6.1423850  | 0.3678461  | -1.3766936 |
| C | 3.6766175  | -0.5220851 | 3.1356720  |
| H | 2.8396241  | -0.2936087 | 3.8000684  |
| H | 4.1481489  | -1.4658309 | 3.4081224  |
| H | 4.3952255  | 0.3008968  | 3.1639888  |
| H | -2.8188193 | -2.8123842 | -1.1513699 |
| C | -0.6861938 | -3.2593262 | 0.1090707  |
| H | -0.3261035 | -3.9076659 | -0.7045675 |
| H | 0.0869816  | -3.2229553 | 0.8808001  |
| H | -1.5726683 | -3.7387340 | 0.5363205  |

**Tsr.v**

58

Energy = -2765.828904397

|    |             |            |            |
|----|-------------|------------|------------|
| C  | -0.3238901  | -1.4077744 | 1.1105378  |
| C  | 1.2339903   | -1.4847896 | 1.1150599  |
| C  | 1.7019224   | 0.0003063  | 1.1528751  |
| C  | 0.5221285   | 0.7877952  | 0.6373905  |
| C  | -0.6439784  | -0.0219027 | 0.5843316  |
| C  | 0.4808014   | 2.1365361  | 0.1576684  |
| C  | -1.8664456  | 0.4342297  | -0.0453449 |
| H  | -0.7411966  | -2.2321333 | 0.5330483  |
| H  | -0.7015486  | -1.4803998 | 2.1388515  |
| H  | 1.8920079   | 0.2845557  | 2.1958558  |
| H  | 2.6213586   | 0.1530840  | 0.5880037  |
| Co | -0.22265996 | 0.7674460  | -1.1995422 |
| C  | -1.0469849  | 0.1310387  | -2.9794254 |
| H  | -2.0500348  | -0.2554030 | -3.0866039 |
| C  | -0.6800559  | 1.5132281  | -3.0588302 |
| H  | -1.3423128  | 2.3414359  | -3.2655904 |
| C  | 0.7284784   | 1.5794505  | -2.8250518 |
| H  | 1.3175338   | 2.4851249  | -2.7905994 |
| C  | 0.1218144   | -0.6454276 | -2.7171454 |
| H  | 0.1547324   | -1.7168397 | -2.5800937 |
| C  | 1.2243939   | 0.2527582  | -2.6173902 |
| H  | 2.2508189   | -0.0108863 | -2.4013625 |
| C  | -0.4793344  | 3.1440871  | 0.7681388  |
| H  | -0.3434228  | 3.1554857  | 1.8643983  |
| C  | -1.9707765  | 3.0232046  | 0.5447314  |
| C  | -2.6863116  | 1.6487386  | 0.4579595  |
| O  | -2.6392861  | 4.0429725  | 0.5250557  |
| C  | -3.9284244  | 1.9033901  | -0.3979309 |
| C  | -4.0014927  | 1.7315763  | -1.6970251 |
| H  | -4.7160693  | 2.5177212  | 0.0282701  |
| C  | -3.1519837  | 1.3649564  | 1.9196854  |
| H  | -2.2806524  | 1.2518171  | 2.5730659  |
| H  | -3.7704796  | 2.1885227  | 2.2898121  |
| H  | -3.7368889  | 0.4417331  | 1.9524680  |
| C  | -2.7556886  | -0.7451669 | -0.4579652 |

H -2.1407844 -1.5686076 -0.8267994  
H -3.3458845 -1.1152020 0.3926245  
H -3.4651151 -0.4911513 -1.2445440  
O -4.1131411 1.5312513 -2.8493522  
C 1.7017146 -2.2172328 2.3794022  
C 1.7171914 -2.2478129 -0.1238488  
O 2.1980388 -3.4449205 2.1108665  
O 3.0045701 -1.9463752 -0.4223401  
O 1.0633257 -3.0573978 -0.7481866  
O 1.6063794 -1.7590981 3.4988328  
C 2.6181267 -4.2056789 3.2745976  
H 1.7695273 -4.3570654 3.9458355  
H 2.9788290 -5.1532492 2.8763670  
H 3.4109988 -3.6704274 3.8025150  
C 3.5671782 -2.7189018 -1.5133443  
H 2.9958981 -2.5495253 -2.4293887  
H 4.5906857 -2.3596908 -1.6173730  
H 3.5453610 -3.7824220 -1.2631304  
H -0.2252788 4.1524095 0.4271182  
C 1.8280179 2.7882607 -0.1215864  
H 2.2874930 3.1465282 0.8127642  
H 2.5266952 2.0950379 -0.5976963  
H 1.7103867 3.6584154 -0.7758009

### V

58

Energy = -2765.840700216

C 1.1978557 1.0966258 -0.6477916  
C 2.1902393 0.0127870 -0.1209831  
C 1.4758626 -1.3527165 -0.3410754  
C 0.0183253 -1.0094508 -0.5380335  
C -0.1424313 0.4007718 -0.6990588  
C -1.1286180 -1.8655609 -0.4040007  
C -1.4598142 0.9875474 -0.7766182  
H 1.2233175 1.9790326 -0.0064764  
H 1.4738414 1.4078289 -1.6644656  
H 1.8686610 -1.8121767 -1.2565315  
H 1.6615620 -2.0435677 0.4818942  
Co -1.1968575 -0.2602636 0.8392705  
C -2.1769662 0.8766091 2.2472214  
H -2.7445445 1.7663573 2.0153164  
C -2.6933706 -0.4567511 2.2419129  
H -3.7140500 -0.7476925 2.0437450  
C -1.6016535 -1.3236278 2.5594100  
H -1.6516161 -2.4018462 2.6129945  
C -0.7871589 0.8330969 2.5837461  
H -0.1108084 1.6737383 2.6439956  
C -0.4322278 -0.5319197 2.7757070  
H 0.5502897 -0.9117215 3.0183866  
C -2.2657126 -1.9020450 -1.4258690  
H -2.2308164 -2.8532577 -1.9734026  
C -2.1442629 -0.8084878 -2.4558643  
C -2.3723368 0.6414814 -1.9806637  
O -1.8811658 -1.0628980 -3.6195049  
C -3.8601924 0.7532289 -1.6589269  
C -4.4035534 0.8435039 -0.4645528  
H -4.5658033 0.7642799 -2.4869385  
C -2.0677667 1.5893442 -3.1657976  
H -1.0001782 1.5629222 -3.4045294  
H -2.6144211 1.2618651 -4.0535911  
H -2.3625790 2.6123994 -2.9243777  
C -1.5170141 2.4727587 -0.4191043  
H -0.9747985 2.6683295 0.5079103  
H -1.0655520 3.0942947 -1.2036310  
H -2.5500145 2.8094732 -0.2894342  
O -4.9473746 0.9576057 0.5692226  
C 3.4915867 0.0851087 -0.9326482  
C 2.5319418 0.2826925 1.3494831  
O 4.3158033 1.0377152 -0.4368353  
O 3.1869674 -0.7790163 1.8857288

O 2.3015442 1.3003563 1.9665290  
O 3.7400754 -0.5727386 -1.9194376  
C 5.5497321 1.2271826 -1.1782169  
H 5.3255013 1.5295462 -2.2040065  
H 6.0816562 2.0135576 -0.6439307  
H 6.1243116 0.2977888 -1.1892419  
C 3.6543921 -0.5798314 3.2441997  
H 2.8113597 -0.3745178 3.9089181  
H 4.1484162 -1.5126640 3.5141862  
H 4.3521998 0.2606587 3.2760089  
H -3.2286154 -1.8403513 -0.9070132  
C -0.8872121 -3.2511163 0.1734909  
H -0.5202976 -3.9303988 -0.6100227  
H -0.1547572 -3.2407107 0.9846520  
H -1.8209005 -3.6751597 0.5586460

### Tsv-p1

58

Energy = -2765.812090389

C -0.3238023 -1.5985640 0.6587505  
C 1.2379362 -1.5871144 0.7438135  
C 1.6646395 -0.0914782 0.8423012  
C 0.4149728 0.6996653 0.5380750  
C -0.7214700 -0.1561962 0.4465675  
C 0.2698481 2.1496144 0.6543676  
C -1.9852651 0.3594445 0.0043617  
H -0.6498327 -2.2880541 -0.1216258  
H -0.7618744 -1.9416981 1.6045224  
H 1.9901914 0.1131035 1.8698480  
H 2.5023392 0.1407193 0.1832963  
Co -0.4323223 0.8760736 -1.2355918  
C -1.2725349 0.3660781 -3.0842185  
H -2.3152303 0.1212863 -3.2297168  
C -0.7050198 1.6576284 -3.1550098  
H -1.2254795 2.5834282 -3.3495411  
C 0.6968087 1.5468995 -2.8320047  
H 1.3758894 2.3833605 -2.7457374  
C -0.2384671 -0.5552003 -2.7099159  
H -0.3471825 -1.6174244 -2.5436971  
C 0.9860995 0.1804733 -2.5896676  
H 1.9481606 -0.2281265 -2.3130970  
C -0.5312860 2.5337268 1.9030136  
H -0.0045761 2.2002335 2.8073630  
C -1.9328803 1.9450407 1.9484031  
C -2.5791285 1.6973171 0.5622719  
O -2.5100627 1.7270597 2.9982126  
C -2.2183681 2.8540242 -0.3278265  
C -0.9189899 3.1103633 -0.6874906  
H -2.9729541 3.6045839 -0.5607466  
C -4.1037712 1.6311497 0.7538289  
H -4.3876725 0.8241682 1.4317817  
H -4.4424474 2.5700936 1.2011317  
H -4.6153502 1.5054259 -0.2038158  
C -2.9860792 -0.6616614 -0.4985324  
H -2.4790809 -1.4754785 -1.0232903  
H -3.5586155 -1.0977222 0.3311107  
H -3.7012127 -0.2090499 -1.1890253  
O -0.3047321 3.9813033 -1.2877788  
C 1.6672211 -2.3534143 2.0062577  
C 1.8507253 -2.3022683 -0.4647854  
O 1.5937639 -3.6875660 1.7941818  
O 3.1961931 -2.1379696 -0.4731150  
O 1.2537562 -2.9453868 -1.3022920  
O 1.9739626 -1.8529435 3.0655027  
C 1.9130531 -4.5111365 2.9479526  
H 1.2151505 -4.2981950 3.7611957  
H 1.8088969 -5.5375982 2.5985819  
H 2.9340194 -4.3071574 3.2792234  
C 3.8892799 -2.8333902 -1.5426393  
H 3.5408236 -2.4717763 -2.5134278

H 4.9434174 -2.6028734 -1.3932839  
H 3.7040487 -3.9075810 -1.4671921  
H -0.6272977 3.6257477 1.9483216  
C 1.5664546 2.9213520 0.5100998  
H 2.2142568 2.7200911 1.3743609  
H 2.0980057 2.6253692 -0.3982490  
H 1.3780852 3.9941964 0.4529351

**P1<sub>exo</sub>**  
58

Energy = -2765.874645694

C 1.1817398 1.1080709 -0.4681883  
C 2.0350422 -0.0183765 0.1915327  
C 1.1555946 -1.3028982 0.1734649  
C -0.2050577 -0.8956210 -0.3702474  
C -0.1880008 0.5027646 -0.6768371  
C -1.0691194 -1.9576519 -1.0592457  
C -1.3672560 1.2404081 -0.9923214  
H 1.1960807 2.0024926 0.1570889  
H 1.5937838 1.3864453 -1.4467069  
H 1.6248402 -2.0284050 -0.4968644  
H 1.1035672 -1.7694732 1.1589098  
Co -1.4928488 0.3126705 0.8190475  
C -2.1175134 1.7903947 2.1446546  
H -2.5080028 2.7567625 1.8557956  
C -2.8765071 0.5955611 2.3061871  
H -3.9434788 0.4971308 2.1642596  
C -1.9785479 -0.4707403 2.6545824  
H -2.2522250 -1.5063899 2.8026195  
C -0.7464102 1.4775510 2.3972345  
H 0.0923967 2.1560314 2.3422717  
C -0.6674695 0.0870767 2.7151574  
H 0.2389161 -0.4593387 2.9384004  
C -1.2843332 -1.6140855 -2.5500026  
H -0.3371744 -1.6226681 -3.1027081  
C -1.9744826 -0.2816204 -2.8077153  
C -2.5561065 0.4448682 -1.5843448  
O -2.0104799 0.2114933 -3.9228760  
C -2.9167487 -0.4542619 -0.3957095  
C -2.4381262 -1.8290134 -0.3453340  
H -3.9363295 -0.3269849 -0.0343909  
C -3.7426140 1.3198905 -1.9872717  
H -3.4771476 1.9992396 -2.8003052  
H -4.5616829 0.6808683 -2.3318807  
H -4.0975442 1.8976707 -1.1273182  
C -1.2822252 2.7276640 -1.2189455  
H -0.5020972 3.1784713 -0.6001805  
H -1.0501349 2.9380110 -2.2726751  
H -2.2276448 3.2228884 -0.9856755  
O -2.9826349 -2.7606474 0.2450322  
C 3.2909129 -0.2277144 -0.6726479  
C 2.4942383 0.3844307 1.5947964  
O 4.2295920 0.7007679 -0.3783746  
O 3.0695302 -0.6731455 2.2182867  
O 2.3908267 1.4809912 2.1031237  
O 3.4151490 -1.0595002 -1.5448355  
C 5.4302656 0.6408425 -1.1937591  
H 5.1748621 0.7996423 -2.2442276  
H 6.0660505 1.4417208 -0.8182799  
H 5.9107421 -0.3334944 -1.0777224  
C 3.5981832 -0.3883083 3.5396593  
H 2.7946940 -0.0555092 4.2016410  
H 4.0244937 -1.3301782 3.8830072  
H 4.3612515 0.3910877 3.4739129  
H -1.9217584 -2.3861685 -3.0053299  
C -0.5304257 -3.3827279 -0.9180195  
H 0.3860443 -3.5221809 -1.5002009  
H -0.3313140 -3.6296149 0.1281328  
H -1.2853552 -4.0871902 -1.2776569

**Tsu-III<sub>exo2</sub>**

58

Energy = -2765.801029417

C 1.3164481 2.2966336 -0.4631730  
C -1.0777934 2.3857836 -1.0585376  
C -0.6451338 0.9503810 -0.8867168  
C 0.7644808 0.8910735 -0.6153392  
C -1.3383696 -0.2230039 -0.8627953  
C 1.3296296 -0.3397294 -0.5376428  
H 1.8192641 2.6351189 -1.3794083  
H 2.0093543 2.4152947 0.3730958  
H -2.0852259 2.6063652 -0.6946401  
H -1.0219245 2.7259580 -2.1007460  
Co -0.0043990 -1.7340966 -0.8453471  
C 1.3121993 -2.9328568 -1.9127511  
H 2.3587279 -3.0487798 -1.6719810  
C 0.2519394 -3.7559448 -1.4479098  
H 0.3532897 -4.5804248 -0.7571243  
C -0.9762515 -3.2711150 -1.9766911  
H -1.9562547 -3.6805307 -1.7788044  
C 0.7390755 -1.9209689 -2.7585671  
H 1.2705385 -1.1265933 -3.2623973  
C -0.6690909 -2.1397201 -2.7924924  
H -1.3809927 -1.5290145 -3.3289879  
C -2.8008942 -0.3497573 -1.1990272  
H -3.4208047 0.2788255 -0.5425269  
H -2.9938765 -0.0293912 -2.2299767  
C -1.0858575 -1.1310982 0.8749752  
H -0.7101678 -0.2380442 1.3651982  
C -0.2774581 -2.3016903 1.1057220  
C 0.8418878 -2.3984953 2.0419850  
O -0.9565374 -3.5439379 1.1324756  
C 0.8894790 -3.6793452 2.4924933  
C -0.2171165 -4.4370524 1.9281102  
H 1.5832671 -4.1062994 3.2046868  
C 1.6509853 -1.2384900 2.5367252  
H 1.4606251 -0.3307942 1.9624282  
H 1.3870753 -1.0431650 3.5829398  
H 2.7223733 -1.4578761 2.5065584  
C 2.8068764 -0.5722511 -0.4081742  
H 3.2682079 -0.6772514 -1.4012767  
H 3.3062384 0.2693814 0.0920196  
H 3.0370592 -1.4874629 0.1454885  
O -0.5586672 -5.5949428 2.0421110  
C 0.0215175 3.1407503 -0.2433497  
C 0.2117022 4.5794822 -0.7075801  
O -0.2230661 5.0586905 -1.7327102  
O 1.0014166 5.2547791 0.1653446  
C -0.3663159 3.0933836 1.2382900  
O 0.1402553 2.3889378 2.0866477  
O -1.4155749 3.9176039 1.4781080  
C 1.2791323 6.6306716 -0.2010617  
H 1.9121535 7.0148738 0.5982368  
H 1.7960406 6.6652917 -1.1633504  
H 0.3450923 7.1939900 -0.2693462  
C -1.8883276 3.9224169 2.8491277  
H -1.0835446 4.2325502 3.5202389  
H -2.7099358 4.6378488 2.8634430  
H -2.2319745 2.9235629 3.1302866  
H -3.1500939 -1.3812798 -1.0991379  
H -2.1535281 -1.3046461 0.9892493

**III<sub>exo2</sub>**

58

Energy = -2765.825935290

C 0.4563840 1.9483653 1.4483755  
C -1.5381885 1.4843601 0.0130059  
C -0.9141992 0.1887693 0.5082929  
C 0.4210846 0.5012744 1.0309107  
C -1.5665739 -1.0297251 0.6519953

|    |            |            |            |   |            |            |            |
|----|------------|------------|------------|---|------------|------------|------------|
| C  | 1.3137707  | -0.4184367 | 0.6212715  | C | 2.5176513  | -2.2879757 | -0.7956418 |
| H  | 1.4463078  | 2.4068253  | 1.4401814  | H | 2.4655949  | -3.2185690 | -1.3420272 |
| H  | 0.0042811  | 2.1143955  | 2.4334802  | C | 2.6996219  | -0.9825127 | -1.3421138 |
| H  | -2.4825688 | 1.6595997  | 0.5426875  | H | 2.8413825  | -0.7500540 | -2.3896771 |
| H  | -1.7443493 | 1.5109521  | -1.0583514 | C | 2.4960353  | -0.7186632 | 0.9228626  |
| Co | 0.1582793  | -1.4674736 | -0.5635114 | H | 2.4061385  | -0.2913867 | 1.9122729  |
| C  | 1.5851586  | -1.9305323 | -1.9642861 | C | 2.7484497  | -0.0202862 | -0.2658502 |
| H  | 2.6022896  | -2.2036992 | -1.7196950 | H | 2.8907381  | 1.0457703  | -0.3766172 |
| C  | 0.4842445  | -2.8300278 | -2.0972938 | C | 0.1491964  | -0.5409802 | -3.4337057 |
| H  | 0.5203020  | -3.8960576 | -1.9233342 | H | -0.7039714 | -0.3387871 | -4.0989718 |
| C  | -0.6794377 | -2.0764168 | -2.4061636 | H | 0.8472927  | 0.2953224  | -3.5238111 |
| H  | -1.6760348 | -2.4768223 | -2.5232708 | C | -1.1595449 | -1.9573577 | -1.7325972 |
| C  | 1.0977531  | -0.6056761 | -2.2476502 | H | -2.2210980 | -1.8135488 | -1.9947190 |
| H  | 1.6645235  | 0.3132001  | -2.2197481 | C | -0.9860222 | -2.3508278 | -0.2525205 |
| C  | -0.2885924 | -0.7002614 | -2.5063058 | C | -2.2687391 | -2.6486725 | 0.4741738  |
| H  | -0.9365484 | 0.1417083  | -2.7042757 | O | -0.2069751 | -3.5481929 | -0.0838905 |
| C  | -2.9537330 | -1.2458925 | 0.1044812  | C | -2.1689687 | -3.8590504 | 1.0595021  |
| H  | -3.6973551 | -1.0358088 | 0.8881405  | C | -0.8634388 | -4.4424068 | 0.7661109  |
| H  | -3.1634378 | -0.5960706 | -0.7495163 | H | -2.9241143 | -4.3789513 | 1.6348034  |
| C  | -1.0319722 | -2.0753368 | 1.6234230  | C | -3.4663392 | -1.7573277 | 0.4653514  |
| H  | -0.3665707 | -1.6037673 | 2.3509037  | H | -3.3006148 | -0.8615458 | 1.0733831  |
| C  | -0.2453786 | -3.0077872 | 0.7286550  | H | -3.6874227 | -1.4058873 | -0.5494385 |
| C  | 0.8514040  | -3.8465812 | 1.2204513  | H | -4.3408363 | -2.2875882 | 0.8507229  |
| O  | -1.1565235 | -3.9139050 | 0.0757013  | C | -0.6447771 | -1.0740403 | 2.3393796  |
| C  | 0.6509270  | -5.1204177 | 0.7971915  | H | -0.0131857 | -0.3566538 | 2.8772675  |
| C  | -0.6049420 | -5.1960390 | 0.0632383  | H | -1.6605786 | -0.9991390 | 2.7478323  |
| H  | 1.2808371  | -5.9845055 | 0.9656745  | H | -0.2688846 | -2.0797231 | 2.5470041  |
| C  | 1.9737650  | -3.3508249 | 2.0773365  | O | -0.3398065 | -5.4753276 | 1.1201879  |
| H  | 1.7691501  | -2.3503376 | 2.4649111  | C | -0.4582693 | 2.6127766  | -0.1576812 |
| H  | 2.1412862  | -4.0325213 | 2.9172272  | C | 0.8705868  | 2.8326317  | 0.5753476  |
| H  | 2.9065300  | -3.3030939 | 1.5044839  | O | 1.8543471  | 3.2991561  | 0.0359088  |
| C  | 2.8040002  | -0.2932327 | 0.6853327  | O | 0.8378588  | 2.4696679  | 1.8761329  |
| H  | 3.1865025  | 0.0806349  | -0.2748839 | C | -1.1045365 | 3.9759868  | -0.4189361 |
| H  | 3.1200913  | 0.4101112  | 1.4672242  | O | -1.8128408 | 4.2400349  | -1.3666599 |
| H  | 3.3007309  | -1.2508079 | 0.8638699  | O | -0.8463627 | 4.8380714  | 0.5920381  |
| O  | -1.1633561 | -6.1169573 | -0.4993772 | C | 2.0670435  | 2.7270679  | 2.6035149  |
| C  | -0.4905052 | 2.5915186  | 0.3781643  | H | 1.8870879  | 2.3446669  | 3.6079461  |
| C  | 0.3151869  | 2.9797328  | -0.8664089 | H | 2.9023826  | 2.2095150  | 2.1269862  |
| O  | 0.1712163  | 2.5294553  | -1.9841163 | H | 2.2669018  | 3.8012017  | 2.6209672  |
| O  | 1.2517611  | 3.9052045  | -0.5508208 | C | -1.4578731 | 6.1478120  | 0.4527149  |
| C  | -1.2170750 | 3.8212858  | 0.9256667  | H | -2.5457366 | 6.0502328  | 0.4193227  |
| O  | -1.3932939 | 4.0727627  | 2.0975476  | H | -1.1393637 | 6.7034338  | 1.3339577  |
| O  | -1.7040694 | 4.5749780  | -0.0901784 | H | -1.1048981 | 6.6262737  | -0.4638128 |
| C  | 2.0608467  | 4.3608632  | -1.6650173 | H | 0.6450796  | -1.4458628 | -3.8006425 |
| H  | 2.7300368  | 5.1092366  | -1.2419310 | H | -0.7882902 | -2.7993390 | -2.3240763 |
| H  | 2.6242086  | 3.5240155  | -2.0857074 |   |            |            |            |
| H  | 1.4207919  | 4.7940802  | -2.4374871 |   |            |            |            |
| C  | -2.4577792 | 5.7459081  | 0.3215713  |   |            |            |            |
| H  | -1.8226199 | 6.4065967  | 0.9165485  |   |            |            |            |
| H  | -2.7644782 | 6.2256116  | -0.6071945 |   |            |            |            |
| H  | -3.3247514 | 5.4426310  | 0.9135482  |   |            |            |            |
| H  | -3.0848931 | -2.2867954 | -0.2020645 |   |            |            |            |
| H  | -1.8444243 | -2.5982652 | 2.1470964  |   |            |            |            |

  

|                          |            |            |            |                        |            |            |            |
|--------------------------|------------|------------|------------|------------------------|------------|------------|------------|
| <b>TSIII-P2exo2</b>      |            |            |            | <b>IIendo</b>          |            |            |            |
| 58                       |            |            |            | 58                     |            |            |            |
| Energy = -2765.790757850 |            |            |            | Energy = -2765.8059269 |            |            |            |
| C                        | -1.4728290 | 1.7052356  | 0.6266861  | C                      | 1.5495803  | 1.6832893  | -0.7754259 |
| C                        | -0.1892180 | 1.8424475  | -1.4841007 | C                      | -0.8547834 | 2.2788984  | -0.8063111 |
| C                        | -0.4315855 | 0.3827358  | -1.1359135 | C                      | -0.7007729 | 0.7718039  | -0.7659656 |
| C                        | -1.0277461 | 0.3332076  | 0.2064027  | C                      | 0.7064375  | 0.4244100  | -0.7566897 |
| C                        | -0.3263592 | -0.7285518 | -2.0155468 | C                      | -1.5915927 | -0.2335153 | -0.7407025 |
| C                        | -0.5886881 | -0.7637645 | 0.8804127  | C                      | 1.0188308  | -0.8804247 | -0.7209389 |
| H                        | -1.4486556 | 1.8877828  | 1.7010094  | H                      | 1.8994706  | 1.9192833  | -1.7878341 |
| H                        | -2.4832786 | 1.9241907  | 0.2516975  | H                      | 2.4210348  | 1.6581044  | -0.1163293 |
| H                        | -0.9166614 | 2.1742677  | -2.2352107 | H                      | -1.6606583 | 2.6716979  | -0.1849329 |
| H                        | 0.8110592  | 2.0645256  | -1.8611976 | H                      | -1.0241136 | 2.6176741  | -1.8382487 |
| Co                       | 0.8306958  | -1.0677598 | -0.4276234 | Co                     | -0.6643555 | -1.9911765 | -0.7364242 |
| C                        | 2.3157783  | -2.1187133 | 0.5995617  | C                      | 0.2490102  | -3.5365767 | -1.8914061 |
| H                        | 2.0944966  | -2.9070766 | 1.3059485  | H                      | 1.2189068  | -3.9734113 | -1.7026038 |
|                          |            |            |            | C                      | -0.9962604 | -4.0010159 | -1.4127843 |
|                          |            |            |            | H                      | -1.1472905 | -4.8550791 | -0.7669070 |
|                          |            |            |            | C                      | -2.0240856 | -3.1220083 | -1.8824597 |
|                          |            |            |            | H                      | -3.0804011 | -3.2001205 | -1.6669655 |
|                          |            |            |            | C                      | 0.0032785  | -2.3534046 | -2.6684005 |
|                          |            |            |            | H                      | 0.7430724  | -1.7585502 | -3.1827016 |
|                          |            |            |            | C                      | -1.4022615 | -2.1158921 | -2.6775783 |
|                          |            |            |            | H                      | -1.8950486 | -1.2979022 | -3.1810077 |

|   |            |            |            |
|---|------------|------------|------------|
| C | -3.0812491 | -0.0721945 | -0.7995067 |
| H | -3.3663725 | 0.9701712  | -0.6053197 |
| H | -3.4837973 | -0.3413879 | -1.7873626 |
| C | -1.6215485 | -2.3188441 | 1.0133465  |
| H | -2.3685246 | -1.5802276 | 1.2782401  |
| C | -0.2933912 | -2.0483910 | 1.3925506  |
| C | 0.7593897  | -2.9799510 | 1.8044965  |
| O | -0.0270953 | -0.8093982 | 1.9740590  |
| C | 1.6506412  | -2.2765238 | 2.5414402  |
| C | 1.1968426  | -0.8925180 | 2.6521188  |
| H | 2.5583302  | -2.6323579 | -3.0100236 |
| C | 0.7913453  | -4.4415357 | 1.4950418  |
| H | -0.2081801 | -4.8826251 | 1.5723895  |
| H | 1.1514822  | -4.6210895 | 0.4775383  |
| H | 1.4560749  | -4.9633271 | 2.1879235  |
| C | 2.4001365  | -1.4565617 | -0.7559699 |
| H | 2.6546125  | -1.8493050 | -1.7520834 |
| H | 3.1413479  | -0.6845938 | -0.5108677 |
| H | 2.5305185  | -2.2797363 | -0.0457260 |
| O | 1.6689052  | 0.0666899  | 3.2185676  |
| C | 0.5462158  | 2.7931492  | -0.3339182 |
| C | 0.8457194  | 4.1316753  | -1.0092757 |
| O | 1.5307574  | 4.2936919  | -1.9966389 |
| O | 0.1703023  | 5.1335816  | -0.3933974 |
| C | 0.6759589  | 2.9897101  | 1.1833932  |
| O | 1.7067176  | 3.3623000  | 1.7061941  |
| O | -0.4519391 | 2.6967481  | 1.8580502  |
| C | 0.3636898  | 6.4474660  | -0.9736180 |
| H | -0.2346805 | 7.1198456  | -0.3592892 |
| H | 1.4216630  | 6.7185929  | -0.9362827 |
| H | 0.0221837  | 6.4544689  | -2.0121081 |
| C | -0.3368149 | 2.8088625  | 3.3029048  |
| H | -0.0755342 | 3.8352258  | 3.5734196  |
| H | -1.3231095 | 2.5409797  | 3.6820735  |
| H | 0.4274293  | 2.1154924  | 3.6578027  |
| H | -3.6082369 | -0.7026216 | -0.0731858 |
| H | -1.9577878 | -3.3515450 | 1.0255936  |

**TSII-IIIendo1**

58

Energy = -2765.787986300

|    |            |            |            |
|----|------------|------------|------------|
| C  | 0.6249615  | 1.4804531  | 0.8778853  |
| C  | -1.2772161 | 1.8421156  | -0.6738116 |
| C  | -0.7477238 | 0.4300226  | -0.7829110 |
| C  | 0.2817591  | 0.2147196  | 0.1398971  |
| C  | -1.0644872 | -0.6670773 | -1.5729211 |
| C  | 0.7593144  | -1.1021843 | 0.2395252  |
| H  | 1.6971332  | 1.6719421  | 0.9777113  |
| H  | 0.2034965  | 1.4793518  | 1.8918599  |
| H  | -2.1656201 | 1.8710303  | -0.0294257 |
| H  | -1.5190024 | 2.3150654  | -1.6271333 |
| Co | -0.0811048 | -2.2032855 | -1.1567502 |
| C  | 1.2622506  | -3.8572024 | -1.3283765 |
| H  | 1.8239174  | -4.3320569 | -0.5361846 |
| C  | -0.0171684 | -4.2476241 | -1.8055748 |
| H  | -0.6258915 | -5.0428869 | -1.3945660 |
| C  | -0.3973093 | -3.3922039 | -2.8766385 |
| H  | -1.3171746 | -3.4452556 | -3.4414922 |
| C  | 1.6826471  | -2.7280254 | -2.1037110 |
| H  | 2.6080046  | -2.1814829 | -1.9865753 |
| C  | 0.6641464  | -2.4465514 | -3.0627527 |
| H  | 0.6882903  | -1.6455555 | -3.7891096 |
| C  | -2.1289156 | -0.6039755 | -2.6278875 |
| H  | -2.6238995 | 0.3744335  | -2.6712456 |
| H  | -1.7129944 | -0.8187631 | -3.6199663 |
| C  | -1.4748197 | -2.5565137 | 0.2882802  |
| H  | -2.4733591 | -2.2334618 | -0.0006937 |
| C  | -0.9381570 | -1.8183636 | 1.4149385  |
| C  | -0.2083710 | -2.3837866 | 2.5442899  |
| O  | -1.6475463 | -0.7196904 | 1.8660926  |

|   |            |            |            |
|---|------------|------------|------------|
| C | -0.4101063 | -1.5740521 | 3.6165437  |
| C | -1.3149294 | -0.4984132 | 3.2366484  |
| H | -0.0084016 | -1.6716023 | 4.6159757  |
| C | 0.5131088  | -3.6895682 | 2.4767151  |
| H | -0.1547811 | -4.4942926 | 2.8100302  |
| H | 0.8116609  | -3.9133763 | 1.4500610  |
| H | 1.3953106  | -3.6968301 | 3.1230906  |
| C | 2.0835476  | -1.3461886 | 0.9228214  |
| H | 2.8771850  | -0.9088547 | 0.2998316  |
| H | 2.1430902  | -0.8673980 | 1.9099971  |
| H | 2.3197586  | -2.4052635 | 1.0360592  |
| O | -1.7816138 | 0.4393488  | 3.8361492  |
| C | -0.0958407 | 2.5791350  | 0.0342912  |
| C | 0.8667894  | 3.1295876  | -1.0279591 |
| O | 0.7783819  | 2.9753585  | -2.2262541 |
| O | 1.8751783  | 3.8166728  | -0.4319986 |
| C | -0.5766200 | 3.7391616  | 0.9044060  |
| O | -0.4751572 | 3.8204661  | 2.1075231  |
| O | -1.1718921 | 4.6826337  | 0.1289445  |
| C | 2.8481798  | 4.3837835  | -1.3445552 |
| H | 3.5647052  | 4.9030395  | -0.7086950 |
| H | 3.3336868  | 3.5890235  | -1.9167941 |
| H | 2.3561849  | 5.0768763  | -2.0317337 |
| C | -1.6855751 | 5.8277097  | 0.8564403  |
| H | -0.8706457 | 6.3324433  | 1.3816528  |
| H | -2.1231628 | 6.4740533  | 0.0960430  |
| H | -2.4383695 | 5.5043055  | 1.5795933  |
| H | -2.8918613 | -1.3713134 | -2.4414017 |
| H | -1.4318178 | -3.6361255 | 0.4414341  |

**IIIendo1**

58

Energy = -2765.8062047

|    |            |            |            |
|----|------------|------------|------------|
| C  | 1.3939264  | 1.5666874  | -0.2886926 |
| C  | -0.9749495 | 2.2693993  | -0.6427340 |
| C  | -0.7948121 | 0.7710639  | -0.7333021 |
| C  | 0.4896151  | 0.3903668  | -0.4859500 |
| C  | -1.6741062 | -0.2925880 | -1.0676661 |
| C  | 0.7828358  | -1.0564684 | -0.4294829 |
| H  | 1.9840394  | 1.7662931  | -1.1947752 |
| H  | 2.1005133  | 1.4500236  | 0.5374426  |
| H  | -1.8067137 | 2.5773583  | -0.0056061 |
| H  | -1.1411795 | 2.7087433  | -1.6357338 |
| Co | -0.9279743 | -1.9526286 | -1.0551202 |
| C  | -0.1618146 | -3.7810880 | -1.8698521 |
| H  | 0.7870684  | -4.2369191 | -1.6324218 |
| C  | -1.4032385 | -4.0494294 | -1.2369402 |
| H  | -1.5555978 | -4.7221773 | -0.4033487 |
| C  | -2.4162351 | -3.2629728 | -1.8554673 |
| H  | -3.4656089 | -3.2553287 | -1.5964382 |
| C  | -0.3876254 | -2.7967617 | -2.8811708 |
| H  | 0.3560482  | -2.3748141 | -3.5427540 |
| C  | -1.7837344 | -2.4880240 | -2.8749165 |
| H  | -2.2707555 | -1.7751393 | -3.5266988 |
| C  | -3.1010629 | 0.0519426  | -1.3760282 |
| H  | -3.5496136 | 0.5202989  | -0.4865071 |
| H  | -3.1560697 | 0.8051097  | -2.1763806 |
| C  | -0.9546388 | -1.9230760 | 0.9534611  |
| H  | -1.6025376 | -1.1513095 | 1.3676531  |
| C  | 0.5058598  | -1.5368957 | 1.0492476  |
| C  | 1.4028164  | -2.6232510 | 1.16129329 |
| O  | 0.7220668  | -0.4160214 | 1.9939902  |
| C  | 2.0309599  | -2.1539053 | 2.7028337  |
| C  | 1.6241729  | -0.7697904 | 2.9674781  |
| H  | 2.7057526  | -2.6946358 | 3.3547652  |
| C  | 1.4759344  | -4.0256209 | 1.1042385  |
| H  | 0.4754592  | -4.4141182 | 0.8914090  |
| H  | 2.0481035  | -4.0857087 | 0.1731064  |
| H  | 1.9595410  | -4.6733010 | 1.8403109  |
| C  | 2.1508743  | -1.3979387 | -1.0139351 |

H 2.2262323 -1.0183132 -2.0380683  
 H 2.9625531 -0.9444562 -0.4259059  
 H 2.3263087 -2.4742790 -1.0508612  
 O 1.9438969 -0.0080581 3.8570553  
 C 0.3979286 2.7515328 -0.0535450  
 C 0.8564496 4.0238732 -0.7645681  
 O 1.7439242 4.0960947 -1.5878621  
 O 0.0786457 5.0688509 -0.3992940  
 C 0.3859321 3.0144333 1.4576238  
 O 1.2861132 3.5961324 2.0274302  
 O -0.6742804 2.4608244 2.0740369  
 C 0.4247196 6.3347181 -1.0174063  
 H -0.2858133 7.0528201 -0.6092444  
 H 1.4505514 6.6051401 -0.7562915  
 H 0.3307073 6.2607750 -2.1039192  
 C -0.6054917 2.4823202 3.5294592  
 H -0.5335294 3.5140550 3.8813234  
 H -1.5345717 2.0169280 3.8577809  
 H 0.2631771 1.9053815 3.8551453  
 H -3.7091009 -0.8093169 -1.6523833  
 H -1.2016720 -2.8968314 1.3825478

**T<sub>SIII-P2</sub>endo1**  
58

Energy = -2765.7976644  
 C -1.3876504 -1.5997334 -0.3113288  
 C 0.8456065 -1.8236984 -1.4042681  
 C 0.5182302 -0.3944827 -1.0479382  
 C -0.6812562 -0.2800635 -0.4115370  
 C 1.2209069 0.8405984 -1.2047566  
 C -0.9919681 1.0277723 0.1759523  
 H -2.1789764 -1.6891987 -1.0679827  
 H -1.8443461 -1.7893421 0.6636856  
 H 1.8496206 -2.1399057 -1.1134616  
 H 0.7470129 -1.9955480 -2.4852706  
 Co 0.1588909 2.3208405 -0.8897153  
 C -1.1738608 3.9310861 -1.1375861  
 H -2.0391770 4.1404802 -0.5239595  
 C 0.1251087 4.4765455 -0.9733501  
 H 0.4283117 5.1696812 -0.2006344  
 C 0.9708323 3.9336111 -1.9835709  
 H 2.0208236 4.1515612 -2.1246671  
 C -1.1558725 3.0487376 -2.2726843  
 H -1.9935780 2.4875335 -2.6629058  
 C 0.1744288 3.0564741 -2.7917656  
 H 0.5227802 2.4853142 -3.6419697  
 C 2.5682584 0.8573611 -1.8755289  
 H 3.2308038 0.0695774 -1.4915416  
 H 2.4274412 0.6610020 -2.9464175  
 C 1.3513205 1.5689028 0.6426822  
 H 2.1024026 0.7882653 0.7545580  
 C 0.0546064 1.2179185 1.3462644  
 C -0.3284765 2.1822415 2.4517587  
 O 0.2036504 -0.0707148 2.0795235  
 C -0.4218197 1.5117820 3.6115171  
 C -0.0842485 0.0990518 3.4127675  
 H -0.6691147 1.9185458 4.5839225  
 C -0.5013988 3.6523706 2.2742230  
 H 0.4143092 4.0987740 1.8710568  
 H -1.2950507 3.8784724 1.5579996  
 H -0.7339330 4.1286455 3.2304787  
 C -2.4464678 1.2566181 0.5462931  
 H -3.0803367 1.1704077 -0.3421020  
 H -2.7957263 0.5149659 1.2797968  
 H -2.6111646 2.2468709 0.9778912  
 O -0.0205652 -0.8160656 4.2077413  
 C -0.2504538 -2.6288376 -0.6205007  
 C -0.7511000 -3.7911931 -1.4782623  
 O -1.7878345 -3.8153034 -2.1061463  
 O 0.1688839 -4.7848568 -1.5034887

C 0.2180385 -3.1930363 0.7301034  
 O -0.5087988 -3.8618541 1.4362688  
 O 1.4721541 -2.8339893 1.0593017  
 C -0.1955599 -5.9357715 -2.3078050  
 H 0.6396768 -6.6280868 -2.2066722  
 H -1.1198996 -6.3764469 -1.9266995  
 H -0.3356423 -5.6365485 -3.3497445  
 C 1.8737620 -3.2192755 2.4058361  
 H 1.7933147 -4.3027623 2.5197274  
 H 2.9092556 -2.8898788 2.4914646  
 H 1.2346902 -2.7102091 3.1311367  
 H 3.0652035 1.8240780 -1.7718350  
 H 1.8026313 2.5292593 0.9060378

**T<sub>SII-III</sub>endo2**  
58

Energy = -2765.8007335  
 C 1.3738456 2.2439878 -0.1107801  
 C -0.9021634 2.3951453 -1.0803492  
 C -0.5395758 0.9533184 -0.8364841  
 C 0.8183067 0.8555780 -0.3754777  
 C -1.2585949 -0.2030728 -0.8970644  
 C 1.3351900 -0.3895592 -0.2342944  
 H 2.0580969 2.5614794 -0.9089232  
 H 1.8934141 2.3373660 0.8452576  
 H -1.9436472 2.6499388 -0.8649893  
 H -0.6931423 2.7109586 -2.1106370  
 Co 0.0338494 -1.7339116 -0.8445767  
 C 1.4022607 -3.0562796 -1.6673317  
 H 2.2926532 -3.3901739 -1.1539601  
 C 0.1289037 -3.7036387 -1.6559245  
 H -0.1008961 -4.6073083 -1.1094512  
 C -0.7805180 -2.9406601 -2.4319367  
 H -1.8222051 -3.1667758 -2.6115053  
 C 1.2797755 -1.8884690 -2.4919393  
 H 2.0610892 -1.1761940 -2.7135453  
 C -0.0655525 -1.8109236 -2.9448336  
 H -0.4763395 -1.0161786 -3.5513652  
 C -2.6593591 -0.3169690 -1.4299407  
 H -3.2622526 0.5612348 -1.1595472  
 H -2.6634601 -0.3900086 -2.5250217  
 C -1.1261550 -1.1585211 0.8086355  
 H -0.7406453 -0.3228922 1.3871340  
 C -0.3834236 -2.3878849 1.0166104  
 C -1.0095746 -3.7035018 1.1654479  
 O 0.7441936 -2.3696876 1.8598779  
 C -0.2334060 -4.4480498 1.9900320  
 C 0.9008220 -3.6448442 2.4324433  
 H -0.3958885 -5.4644731 2.3233095  
 C -2.3381184 -4.0583615 0.5759827  
 H -2.4722502 -3.5953077 -0.4050322  
 H -2.4562665 -5.1409666 0.4801606  
 H -3.1426388 -3.6909498 1.2262897  
 C 2.7300950 -0.6991825 0.2065407  
 H 3.3522638 -1.0252218 -0.6398226  
 H 3.2108667 0.1855325 0.6453386  
 H 2.7425481 -1.5033326 0.9473565  
 O 1.8459154 -3.8954227 3.1470832  
 C 0.0943655 3.1417335 -0.1355027  
 C 0.4242918 4.5445130 -0.6328896  
 O 0.1833577 4.9829791 -1.7375157  
 O 1.0952188 5.2353314 0.3222894  
 C -0.5225180 3.1996550 1.2655298  
 O -0.1873671 2.5361139 2.2222224  
 O -1.5604274 4.0756793 1.2858812  
 C 1.4974806 6.5751797 -0.0603419  
 H 2.0132068 6.9762289 0.8116513  
 H 2.1629990 6.5339014 -0.9262899  
 H 0.6163424 7.1730153 -0.3066000  
 C -2.2344828 4.1887085 2.5644641

H -1.5283914 4.5176970 3.3309945  
H -3.0182794 4.9294188 2.4081178  
H -2.6576730 3.2227787 2.8522122  
H -3.1709199 -1.2072388 -1.0480813  
H -2.2074964 -1.2854265 0.8468206

### III<sub>endo2</sub>

58

Energy = -2765.826293

C 0.5480202 2.2481879 1.1712960  
C -1.4663355 1.4396438 -0.0792651  
C -0.7139526 0.2779754 0.5533590  
C 0.6124682 0.7608299 0.9496977  
C -1.2617977 -0.9413065 0.9609167  
C 1.5336737 -0.1657237 0.6497760  
H 1.4956584 2.7748377 1.0511219  
H 0.1234421 2.5117477 2.1473080  
H -2.3944875 1.6213840 0.4768541  
H -1.7263275 1.3040471 -1.1306076  
Co 0.3776274 -1.4353275 -0.2823077  
C 1.7307344 -2.1684396 -1.6338315  
H 2.7347516 -2.4664422 -1.3650887  
C 0.5787545 -3.0189581 -1.6555834  
H 0.5753391 -4.0632175 -1.3798426  
C -0.5427055 -2.2425564 -2.0369374  
H -1.5635569 -2.5903556 -2.1211931  
C 1.3091888 -0.8673021 -2.0781883  
H 1.9289911 0.0131978 -2.1686839  
C -0.0839929 -0.9092747 -2.3084025  
H -0.6856671 -0.0643120 -2.6092994  
C -2.6908665 -1.2713025 0.6054884  
H -3.3636552 -0.8939627 1.3909062  
H -2.9897855 -0.8166185 -0.3429029  
C -0.5888844 -1.7296530 2.0838614  
H -0.0566310 -1.0504861 2.7556807  
C 0.4421700 -2.6083520 1.3885684  
C 0.1388577 -4.0351399 1.1598269  
O 1.7232605 -2.6032942 2.0261753  
C 1.2195505 -4.7742701 1.5049709  
C 2.2536721 -3.8915278 2.0331082  
H 1.3383398 -5.8482903 1.4411993  
C -1.1880995 -4.5567154 0.7078911  
H -1.5485560 -4.0279505 -0.1789768  
H -1.1354598 -5.6259166 0.4864611  
H -1.9371275 -4.4121791 1.4976635  
C 3.0179242 -0.1130717 0.7432131  
H 3.4755055 -0.1491044 -0.2540068  
H 3.3562620 0.8045139 1.2434130  
H 3.3939389 -0.9771225 1.3006596  
O 3.3804795 -4.1086810 2.4303477  
C -0.4926065 2.6610387 0.0727041  
C 0.2290495 2.9254887 -1.2535565  
O 0.0720271 2.3160032 -2.2914833  
O 1.1059805 3.9471097 -1.1158107  
C -1.2922508 3.8993450 0.4804455  
O -1.4501072 4.2951329 1.6144547  
O -1.8679561 4.4719284 -0.6056090  
C 1.8361504 4.2933052 -2.3203012  
H 2.4706181 5.1319214 -2.0356560  
H 2.4361170 3.4420297 -2.6517170  
H 1.1370556 4.5767562 -3.1109613  
C -2.6915737 5.6333680 -0.3214657  
H -2.0874223 6.4109722 0.1521549  
H -3.0638123 5.9603175 -1.2917464  
H -3.5135886 5.3551457 0.3426768  
H -2.8539782 -2.3489011 0.5336649  
H -1.3244241 -2.3004723 2.6675598

### TS<sub>III-P2endo2</sub>

58

Energy = -2765.7875758

C 1.5392473 -1.6457846 0.3124482  
C -0.1704143 -1.7867634 -1.4877863  
C 0.1283666 -0.3310120 -1.1714874  
C 0.9801953 -0.2835509 0.0141059  
C -0.1089301 0.8076471 -1.9917604  
C 0.7501034 0.8341406 0.7435528  
H 1.7253001 -1.8497192 1.3662080  
H 2.4760359 -1.7931182 -0.2434021  
H 0.3467802 -2.0802182 -2.4093875  
H -1.2288952 -2.0260577 -1.6089235  
Co -0.9753524 1.0869833 -0.2020774  
C -2.3123408 2.0384187 1.0956490  
H -2.0816832 2.9248179 1.6715258  
C -2.8562577 1.9901112 -0.2174409  
H -3.1549498 2.8248408 -0.8332581  
C -2.9582880 0.6072005 -0.5750464  
H -3.3153571 0.2294491 -1.5244097  
C -2.1796021 0.6784928 1.5701760  
H -1.7761928 0.3936920 2.5326140  
C -2.6142256 -0.1964013 0.5648022  
H -2.6255200 -1.2756574 0.5942481  
C -0.8509447 0.6666988 -3.2963643  
H -0.1492935 0.4573218 -4.1182001  
H -1.5795494 -0.1474411 -3.2638866  
C 0.8967372 1.9399580 -1.8928941  
H 1.9035672 1.6268978 -2.2011663  
C 0.9425903 2.4349162 -0.4558294  
C 0.3171431 3.7318001 -0.1052458  
O 2.2918020 2.5408332 0.0324501  
C 1.1325524 4.3782964 0.7700510  
C 2.3948899 3.6644887 0.8705692  
H 0.9711580 5.3408567 1.2376187  
C -0.8684878 4.3417498 -0.7894592  
H -1.2460433 3.6910821 -1.5800189  
H -1.6920472 4.5410658 -0.0971482  
H -0.5681600 5.3027253 -1.2244718  
C 1.1517563 1.1561378 2.1425556  
H 0.7112817 0.4153849 2.8219428  
H 2.2392547 1.1400482 2.2676860  
H 0.7891940 2.1440793 2.4435749  
O 3.4222139 3.8996644 1.4670836  
C 0.4425807 -2.5879808 -0.2966005  
C -0.6649332 -2.9671376 0.6927193  
O -1.6897691 -3.5281340 0.3563310  
O -0.3926112 -2.6197545 1.9689966  
C 1.1094362 -3.8818731 -0.7778556  
O 1.5275361 -4.0811258 -1.8974127  
O 1.2401560 -4.7591853 0.2443090  
C -1.4036466 -3.0107439 2.9338457  
H -1.0168794 -2.6799104 3.8972432  
H -2.3530121 -2.5215547 2.7029142  
H -1.5373305 -4.0947742 2.9120259  
C 1.9072839 -6.0035119 -0.0966496  
H 2.9233585 -5.7989940 -0.4426175  
H 1.9149874 -6.5819068 0.8264585  
H 1.3496336 -6.5201006 -0.8812982  
H -1.3818473 1.5919360 -3.5463574  
H 0.5991264 2.7663071 -2.5476151

### P2<sub>endo</sub>

58

Energy = -2765.8937449

C 0.9256702 1.1578759 1.1288098  
C -1.3807684 1.6768643 0.3056233  
C -1.1003964 0.1979588 0.2398468  
C 0.2130873 -0.0927900 0.6959541  
C -1.8513940 -0.9216143 -0.2332953  
C 0.6107071 -1.4698132 0.6332659  
H 1.9503170 1.2432909 0.7653267















C 0.2802087 -3.2134723 -0.0010173  
 O 1.4120481 -3.6485698 -0.0802208  
 C -0.6490837 -3.1185734 2.3109656  
 O -0.8123196 -2.6734963 3.4270568  
 O -0.7030518 -3.5526730 -0.8663265  
 O -0.8795774 -4.4081335 1.9766723  
 C -0.3192852 -4.5398166 -1.8573067  
 H 0.5000979 -4.1589726 -2.4716711  
 H -0.0039800 -5.4596135 -1.3588615  
 H -1.2150648 -4.7032788 -2.4559375  
 C -1.3333403 -5.2516340 3.0686662  
 H -2.2784924 -4.8720245 3.4641471  
 H -1.4589490 -6.2399495 2.6280095  
 H -0.5837143 -5.2659037 3.8632411  
 H -0.0279720 3.8905737 2.8833657

Ts<sup>N</sup><sub>V-P1</sub>

63  
 Energy = -2823.378837122  
 C -1.3995140 -1.4628399 0.2991860  
 C 1.0323948 -1.3033792 0.8753601  
 C 0.4562132 0.0614278 0.5746255  
 C -0.9331232 -0.0272004 0.2641430  
 C 1.0395204 1.3439839 0.9288311  
 C -1.6545890 1.1238519 -0.1934040  
 H -1.9383631 -1.7878532 -0.5909687  
 H -2.0723537 -1.5914797 1.1551545  
 H 1.2878653 -1.3592878 1.9424141  
 H 1.9330061 -1.5502736 0.3102197  
 Co 0.1030638 0.7994844 -1.2236625  
 C 1.2190633 -0.4044639 -2.5180056  
 H 1.8384019 -1.2297949 -2.1987539  
 C -0.1816857 -0.4770324 -2.8161282  
 H -0.7927859 -1.3698442 -2.7843126  
 C -0.6313859 0.8379873 -3.1771126  
 H -1.6435802 1.1117289 -3.4392022  
 C 1.6100841 0.9505438 -2.6357833  
 H 2.5757413 1.3680979 -2.3885478  
 C 0.4663928 1.7210885 -3.0601103  
 H 0.4519758 2.7915125 -3.2016617  
 C 2.5419348 1.4567937 1.1548281  
 H 2.9799304 0.4768974 1.3778455  
 H 3.0210068 1.8391113 0.2482986  
 C 2.7180298 2.4458848 2.3414620  
 H 3.5050353 3.1797844 2.1476693  
 H 2.9953761 1.8961146 3.2489407  
 C 1.3416902 3.1156637 2.5424169  
 H 1.1777592 3.4565414 3.5693606  
 H 1.2207179 3.9724791 1.8739261  
 C 0.3560377 2.0009535 2.1391138  
 H 0.3696720 1.2421900 2.9417513  
 C -1.0940854 2.3885528 1.9423453  
 C -1.5437949 2.5402250 0.4809078  
 N -1.9181153 2.6187137 -2.8932988  
 C -0.4890594 3.3587834 -0.2160365  
 C 0.7756820 2.8770353 -0.4264665  
 H -0.6799350 4.4130403 -0.4154764  
 C -2.8800461 3.3055465 0.4389816  
 H -3.6775803 2.7614097 0.9471372  
 H -2.7524143 4.2570596 0.9612143  
 H -3.1730458 3.5160799 -0.5931221  
 C -2.9571044 0.8336678 -0.9146941  
 H -2.8841025 -0.0912584 -1.4925966  
 H -3.7852138 0.7226572 -0.2019159  
 H -3.2216465 1.6391099 -1.6027222  
 O 1.8423005 3.3130405 -0.8433933  
 C -0.1147130 -2.3138638 0.5343547  
 C 0.2565189 -3.1803029 -0.6732387  
 O 1.3516939 -3.2702616 -1.1864390  
 C -0.3027849 -3.2456420 1.7428431

O -1.0965310 -3.0744551 2.6420685  
 O -0.8227970 -3.8818773 -1.1001859  
 O 0.5917670 -4.2595731 1.7095469  
 C -0.5605291 -4.7878442 -2.2035801  
 H -0.2055261 -4.2276353 -3.0723215  
 H 0.1950470 -5.5206249 -1.9102532  
 H -1.5167328 -5.2676433 -2.4093335  
 C 0.5439193 -5.1587965 2.8493993  
 H -0.4441364 -5.6200502 2.9182224  
 H 1.3145485 -5.9032465 2.6532038  
 H 0.7541198 -4.6061362 3.7682512  
 H -1.4648644 2.4891947 3.8070196

PI<sup>N</sup>

63  
 Energy = -2823.444015064  
 C 1.4710222 -0.9961969 -0.8059445  
 C 1.1661315 1.3539793 -0.0750634  
 C -0.1426007 0.5916863 0.1012641  
 C 0.0273798 -0.7324635 -0.4166479  
 C -1.1221683 0.9183654 1.2172924  
 C -1.0717802 -1.5981434 -0.6736894  
 H 1.6106475 -1.0835120 -1.8876580  
 H 1.8388617 -1.9135176 -0.3378630  
 H 1.4027931 2.0006658 0.7716297  
 H 1.1757524 1.9810362 -0.9681579  
 Co -1.2169765 0.1879780 -1.6661898  
 C -0.0404994 0.9019731 -3.2493331  
 H 1.0385232 0.9859812 -3.2492404  
 C -0.8031711 -0.2342039 -3.6529836  
 H -0.4015183 -1.1742936 -4.0081479  
 C -2.1896253 0.0612689 -3.4623346  
 H -3.0215016 -0.5971239 -3.6704614  
 C -0.9531047 1.9111132 -2.8073058  
 H -0.6918308 2.8806550 -2.4057459  
 C -2.2732783 1.3978702 -2.9380149  
 H -3.1747871 1.9079339 -2.6260765  
 C -0.7739298 2.0652715 2.1690266  
 H 0.2629495 1.9639473 2.5158301  
 H -0.8942506 3.0427759 1.6935885  
 C -1.7447175 1.8498125 3.3409158  
 H -2.7255598 2.2431177 3.0589162  
 H -1.4254636 2.3639764 4.2527813  
 C -1.8186015 0.3130683 3.5244890  
 H -1.1759351 -0.0182359 4.3460956  
 H -2.8371476 -0.0140265 3.7577073  
 C -1.3239560 -0.2954946 2.1768337  
 H -0.3294260 -0.7394005 2.3286876  
 C -2.1914786 -1.4041323 1.6016871  
 C -2.4013397 -1.3697706 0.0877443  
 N -2.7281402 -2.3431874 2.2834471  
 C -2.7710906 0.0462245 -0.3992015  
 C -2.4285582 1.1982936 0.4280641  
 H -3.7467903 0.1151396 -0.8803395  
 C -3.4903767 -2.3531590 -0.3480384  
 H -3.2366484 -3.3829864 -0.0884991  
 H -4.4253238 -2.1045564 0.1603483  
 H -3.6457574 -2.2750859 -1.4300048  
 C -0.8123681 -2.9363063 -1.3200719  
 H 0.1039301 -2.9182411 -1.9161054  
 H -0.7030666 -3.7139593 -0.5509803  
 H -1.6348275 -3.2353792 -1.9740644  
 O -3.0038625 2.2856766 0.4252416  
 C 2.2386389 0.2344427 -0.2390562  
 C 3.3566139 0.6265821 -1.1985619  
 O 3.2926523 1.5005296 -2.0384784  
 C 2.7809117 -0.0910701 1.1552311  
 O 2.4910976 -1.0655196 1.8175602  
 O 4.4201520 -0.1978142 -1.0515183  
 O 3.5779844 0.9097949 1.5990549

C 5.5212820 0.0504641 -1.9647516  
H 5.1862100 -0.0741293 -2.9974568  
H 5.8991807 1.0658865 -1.8236311  
H 6.2766144 -0.6902622 -1.7048479  
C 4.0916204 0.7318432 2.9441569  
H 4.6800676 -0.1871743 3.0003634  
H 4.7117850 1.6083104 3.1287247  
H 3.2638004 0.6790171 3.6559485  
H -2.5151433 -2.2353353 3.2838357

**Ts<sup>N</sup><sub>III-P2</sub>**  
63

Energy = -2823.375639444

C 1.5184602 1.8368824 0.0720828  
C -0.7623529 1.9079035 -0.8697539  
C -0.5253206 0.5339981 -0.2743733  
C 0.8886133 0.4613572 0.1000310  
C -1.4967841 -0.4296459 0.0843488  
C 1.3814628 -0.8008406 0.0067843  
H 2.1999935 1.9467058 -0.7819760  
H 2.0680565 2.0785625 0.9861924  
H -1.7791045 2.2834927 -0.7363905  
H -0.5190292 1.9552678 -1.9349576  
Co -0.1435688 -1.2941997 -1.1211212  
C 1.0491809 -1.5796186 -2.9467418  
H 2.0912740 -1.3113054 -3.0564208  
C 0.5641021 -2.8168976 -2.3699286  
H 1.1917850 -3.6347301 -2.0393894  
C -0.8580614 -2.7963758 -2.4012927  
H -1.5330417 -3.5993228 -2.1336791  
C -0.0508624 -0.7880623 -3.2905670  
H -0.0232875 0.2105817 -3.7054407  
C -1.2335159 -1.4995909 -2.8817260  
H -2.2483462 -1.1438624 -3.0053058  
C -2.9949626 -0.2862198 -0.1507040  
H -3.3373191 0.7265958 0.1005971  
H -3.2631658 -0.4533621 -1.1975803  
C -3.6335596 -1.3501149 0.7810266  
H -4.5083383 -1.8309305 0.3334143  
H -3.9618829 -0.8791233 1.7151687  
C -2.4983304 -2.3474086 1.0772518  
H -2.6675386 -2.9575493 1.9683080  
H -2.3614153 -3.0168914 0.2207787  
C -1.2709004 -1.4284277 1.2037058  
H -1.3178380 -0.9300847 2.1862340  
C 0.1084450 -2.0892161 1.0212954  
C 1.0124083 -1.9755621 2.2301273  
N 0.1780991 -3.4787284 0.7269343  
C 1.5751350 -3.1767323 2.4826126  
C 1.1091913 -4.1695187 1.4975633  
H 2.2535556 -3.4275135 3.2884936  
C 1.1965734 -0.7195887 3.0257354  
H 0.3911905 0.0014792 2.8660396  
H 1.2620657 -0.9521393 4.0931576  
H 2.1245832 -0.2103017 2.7400870  
C 2.7872466 -1.2932157 0.0145687  
H 3.3030999 -0.9425152 -0.8891036  
H 3.3509389 -0.9320147 0.8837453  
H 2.8242262 -2.3870311 0.0175346  
O 1.4263274 -5.3447815 1.3422424  
C 0.2860939 2.7756809 -0.1032528  
C 0.6710546 4.0280543 -0.8844704  
O 0.4994912 4.1988896 -2.0722980  
O 1.3003877 4.9157978 -0.0765764  
C -0.2789007 3.1451066 1.2724408  
O 0.1174769 2.7335239 2.3422154  
O -1.3397956 3.9781141 1.1355514  
C 1.7506590 6.1293201 -0.7336223  
H 2.2234367 6.7177186 0.0519862  
H 2.4632727 5.8838471 -1.5249056

H 0.8966077 6.6585442 -1.1633394  
C -1.9639816 4.3802601 2.3814297  
H -1.2377117 4.8996867 3.0114782  
H -2.7775017 5.0438698 2.0900401  
H -2.3428042 3.5021913 2.9107197  
H -0.2255946 -3.8824257 -0.1048623

**P2<sup>N</sup>**  
63

Energy = -2823.475735995

C 1.8033291 0.1796567 0.6578368  
C -0.0558572 1.5173586 1.6583201  
C -0.5945766 0.4021469 0.8043942  
C 0.4644051 -0.3618381 0.2300181  
C -1.8875929 -0.0807995 0.4594613  
C 0.1054156 -1.4051807 -0.6850543  
H 2.5385286 0.2642943 -0.1418880  
H 2.2198174 -0.4733888 1.4359564  
H -0.1563086 1.2493361 2.7172030  
H -0.5315782 2.4863820 1.4972154  
Co -0.7276958 0.3803113 -1.1663690  
C -0.4968615 2.2601385 -2.0682891  
H -0.1512352 3.1603660 -1.5805863  
C 0.3031420 1.2868400 -2.7325093  
H 1.3789234 1.3085565 -2.8408751  
C -0.5672192 0.2477923 -3.2063437  
H -0.2529674 -0.6429481 -3.7343832  
C -1.8506484 1.8130083 -2.1104661  
H -2.6939327 2.3251748 -1.6672059  
C -1.9061983 0.5746083 -2.8370350  
H -2.8002374 0.0122590 -3.0712904  
C -3.2166117 0.5841120 0.8119682  
H -3.1229448 1.2606736 1.6700818  
H -3.5922064 1.1846303 -0.0215619  
C -4.1801072 -0.5976554 1.0941009  
H -5.2151936 -0.3702150 0.8212256  
H -4.1679707 -0.8427968 2.1634085  
C -3.5902854 -1.7717843 0.2905649  
H -3.9726586 -2.7489779 0.5996994  
H -3.8081086 -1.6484906 -0.7759968  
C -2.0875518 -1.6012369 0.5364404  
H -1.8872783 -1.9039765 1.5763682  
C -1.0896945 -2.3458873 -0.3817582  
C -0.6245630 -3.6814955 0.1995878  
C -0.9022701 -4.6779297 -0.6562105  
C -1.5537337 -4.1369806 -1.8780832  
H -0.6769708 -5.7313694 -0.5390865  
C 0.0725970 -3.7572549 1.5183906  
H 0.9028809 -3.0405620 1.5596061  
H -0.6029215 -3.5003977 2.3440990  
H 0.4652701 -4.7612471 1.6985471  
C 1.2026641 -2.0152876 -1.5327604  
H 1.8686189 -1.2405243 -1.9225176  
H 1.8093935 -2.7215478 -0.9488119  
H 0.7856424 -2.5684763 -2.3787162  
O -1.8887051 -4.7264348 -2.9004660  
C 1.4642761 1.5791111 1.2869944  
C 1.7240192 2.7626153 0.3483588  
O 1.1374628 3.8245602 0.4136104  
C 2.3077917 1.7545432 2.5579187  
O 2.1434037 1.1065880 3.5702022  
O 2.7159655 2.5187393 -0.5389741  
O 3.2775261 2.6837296 2.4106568  
C 3.0818361 3.6531229 -1.3648316  
H 2.2315898 3.9658662 -1.9755739  
H 3.4007512 4.4842113 -0.7312238  
H 3.9005312 3.2964706 -1.9892928  
C 4.1253506 2.8755956 3.5745596  
H 4.6423560 1.9437483 3.8158375  
H 4.8301346 3.6538783 3.2845045

H 3.5193705 3.1895338 4.4275711  
N -1.6927028 -2.7863338 -1.6331420  
H -1.9283306 -2.1241212 -2.3590417

**I<sup>0</sup>**

62

Energy = -2843.236304688

C -0.3801614 -1.1272799 4.5837507  
O -1.5237694 -1.1515823 3.7518077  
C -1.8275724 0.1587802 3.4055281  
C -0.8734567 1.0527654 4.0472104  
C -0.0112423 0.2790739 4.7497018  
C -2.8344462 0.4626030 2.5688779  
C -3.7049649 -0.5082252 1.8368017  
C -3.2045846 -0.6644767 0.3758985  
C -1.9412717 -1.5489232 0.2990550  
C -1.1079544 -1.2675223 -0.8845273  
Co 0.3304146 -2.1741109 -1.8867537  
C -0.2563681 -2.8140181 -3.8145137  
C -0.9591275 -3.5242968 -2.7875365  
C -0.0096801 -4.2221267 -1.9797917  
C 1.2842538 -3.9113958 -2.4995753  
C 1.1302755 -3.0537697 -3.6368205  
C -0.8882082 2.5374852 3.8812638  
O 0.1082664 -2.1494108 5.0008187  
C -0.6758406 -0.4732899 -1.7715076  
C -0.4059683 0.8520437 -2.3523359  
C 0.9592593 1.4042921 -1.8214801  
C 2.1048338 0.3756452 -2.1013180  
C 1.7811909 -0.9060705 -1.4544724  
C 1.6986714 -1.7416160 -0.5083610  
C 2.0943977 -2.3223754 0.7873375  
H 2.1839455 0.2676029 -3.1878936  
H 3.0498802 0.7806700 -1.7238279  
H -1.1962739 1.5599303 -2.0754759  
H -0.3348767 0.8113898 -3.4444355  
H 2.2286066 -4.2405208 -2.0862601  
H -0.2278367 -4.8570977 -1.1326261  
H -2.0296651 -3.5040622 -2.6314701  
H 1.9343281 -2.6387718 -4.2294840  
H -0.7066447 -2.1807939 -4.5668934  
H -2.2202877 -2.6088160 0.3420200  
H -1.3141776 -1.3710208 1.1831503  
H -3.9975335 -1.0977536 -0.2444998  
H -2.9765801 0.3258951 -0.0332107  
H -4.7359340 -0.1333258 1.8256304  
H -3.7060930 -1.4819563 2.3377639  
H -2.9579251 1.5171567 2.3339554  
H 0.8348648 0.5896707 5.3480139  
H -0.8038199 2.7962750 2.8194658  
H -1.8291549 2.9600572 4.2520222  
H -0.0624491 3.0004334 4.4269500  
H 2.4112997 -3.3655786 0.6706151  
H 2.9195066 -1.7577768 1.2409908  
H 1.2476293 -2.3235981 1.4833906  
C 1.2755522 2.6794321 -2.6067703  
C 0.8342356 1.7007005 -0.3188798  
O 1.4675777 2.7001662 -3.8049342  
O -0.2034363 1.9336188 0.2674785  
O 2.0450527 1.6843687 0.2840999  
O 1.3049727 3.7810672 -1.8211449  
C 1.5857977 5.0226500 -2.5204038  
H 1.5664014 5.7914660 -1.7487858  
H 2.5667232 4.9673476 -2.9985989  
H 0.8201574 5.2047034 -3.2783581  
C 2.0276885 1.9372772 1.7075352  
H 1.4090851 1.1910259 2.2119910  
H 3.0675975 1.8579827 2.0238439  
H 1.6348393 2.9379865 1.9059774

**Ts<sup>0</sup>I-II**

62

Energy = -2843.224288651

C 1.3318301 2.5811401 -0.1245989  
C -1.1031020 2.7583631 -0.2895808  
C -0.9032929 1.3326727 -0.6756612  
C 0.9920970 1.1964189 -0.5576016  
C -1.4653793 0.1758091 -0.8237398  
C 1.4257753 -0.0182973 -0.6784935  
H 1.5194548 3.2293953 -0.9894859  
H 2.2193086 2.5758037 0.5124721  
H -2.0517049 2.8778698 0.2396113  
H -1.0885646 3.4150295 -1.1675648  
Co 0.0484341 0.1735113 -2.0132241  
C 0.8869667 0.7570517 -3.8869883  
H 1.5922407 1.5655535 -4.0230303  
C 1.2132156 -0.5891136 -3.5608219  
H 2.2114590 -0.9817502 -3.4219296  
C -0.0056867 -1.3302777 -3.4104639  
H -0.0936715 -2.3850483 -3.1924488  
C -0.5349131 0.8620324 -3.9453812  
H -1.0999551 1.7648890 -4.1331692  
C -1.0833045 -0.4202019 -3.6599985  
H -2.1367252 -0.6579204 -3.5972166  
C -2.5918372 -0.6878827 -0.3995775  
H -3.5526336 -0.1727116 -0.5481454  
H -2.6193038 -1.5972428 -1.0109555  
C -2.4535557 -1.0688784 1.0955070  
H -3.1926595 -1.8429920 1.3351033  
H -2.6718353 -0.1888813 1.7095474  
H -1.0346886 -1.5614978 1.4663228  
H -0.3555688 -0.7018601 1.3633501  
H -1.0205445 -1.8883003 2.5099443  
C -0.5277485 -2.6441468 0.5715396  
H -0.3553004 -2.3717419 -0.4688513  
C -0.2263104 -3.9023395 0.9371254  
C 0.3130440 -4.9870992 0.1276952  
O -0.3818110 -4.3499555 2.2424290  
C 0.4750151 -6.0553288 0.9436226  
C 0.0453987 -5.6955859 2.2965069  
H 0.8564476 -7.0372270 0.6976498  
C 0.6133816 -4.8678672 -1.3322892  
H -0.3046101 -4.6733891 -1.8994349  
H 1.2951729 -4.0306441 -1.5212724  
H 1.0686895 -5.7838588 -1.7155811  
C 2.5043860 -0.9427197 -2.0695918  
H 3.0698961 -1.2948513 -1.1412728  
H 3.2045364 -0.4589551 0.4242090  
H 2.0937993 -1.8325463 0.2250471  
O 0.0131110 -6.3201141 3.3289963  
C 0.0912856 3.1425879 0.6246661  
C 0.1944036 4.6576611 0.7525619  
O 0.3470472 5.4027886 -0.1946182  
O 0.0906222 5.0788962 2.0337132  
C -0.1124154 2.4638636 1.9878703  
O -1.1927446 2.1781002 2.4613397  
O 1.0632042 2.2123280 2.6072468  
C 0.1689133 6.5175845 2.2140996  
H -0.6369973 7.0065811 1.6616628  
H 0.0615179 6.6734469 3.2868682  
H 1.1331679 6.8861205 1.8556842  
C 0.9371007 1.5735901 3.9036229  
H 1.9593843 1.4498542 4.2597171  
H 0.3575424 2.2090640 4.5776104  
H 0.4391411 0.6068753 3.7943594

**IIa<sup>0</sup>**

62

Energy = -2843.258287721

C 1.7016935 -0.6881601 -1.6088397











C -1.4456114 2.6257721 0.2537124  
O -0.6320642 3.9775262 2.0585930  
C -1.4120900 3.7432992 -0.7931109  
C -0.9936332 3.6726924 -2.0366591  
H -1.7176852 4.7345707 -0.4650653  
C -2.8078577 2.7018984 0.9946637  
H -2.8807605 1.8827540 1.7186260  
H -2.8820493 3.6480340 1.5339984  
H -3.6348134 2.6290952 0.2858389  
C -2.4663698 0.8669103 -1.2713959  
H -2.2584472 -0.0379258 -1.8459387  
H -3.3782206 0.6842169 -0.6879646  
H -2.6864531 1.6738868 -1.9757149  
O -0.6727933 3.6732868 -3.1662591  
C -0.3348975 -2.2116796 1.0768327  
C 0.1442744 -3.1475006 -0.0380980  
O 1.2933277 -3.5000809 -0.2089474  
C -0.8065031 -3.0536022 2.2713838  
O -1.3403770 -2.5849177 3.2545164  
O -0.8851920 -3.5874648 -0.8013622  
O -0.5372790 -4.3687958 2.1183984  
C -0.5160795 -4.5686074 -1.8038427  
H 0.2170870 -4.1444461 -2.4943080  
H -0.0905031 -5.4504227 -1.3187337  
H -1.4453191 -4.8117665 -2.3183873  
C -0.9310867 -5.2096609 3.2355338  
H -2.0103168 -5.1399344 3.3910969  
H -0.6381129 -6.2180380 2.9458632  
H -0.4097165 -4.8919034 4.1414852

**TS<sup>O</sup>V-P1**

62

Energy = -2843.273323036

C -1.4379893 -1.2355955 0.5672197  
C 1.0422681 -1.2063058 0.9104590  
C 0.5537947 0.1219560 0.3790807  
C -0.8614144 0.1130123 0.2068337  
C 1.2744812 1.3865608 0.4248848  
C -1.5309507 1.2140674 -0.4210097  
H -2.0781952 -1.6748854 -0.1982086  
H -2.0411481 -1.1303957 1.4766282  
H 1.3963270 -1.0739010 1.9419267  
H 1.8599092 -1.6497100 0.3393783  
Co 0.0907834 0.5226869 -1.5000977  
C 0.9756303 -1.0161210 -2.6028972  
H 1.5515214 -1.8211385 -2.1705417  
C -0.4475153 -1.0050988 -2.7735575  
H -1.1246400 -1.8091317 -2.5156751  
C -0.8189943 0.2541170 -3.3568618  
H -1.8254464 0.5710277 -3.5913536  
C 1.4646522 0.2447364 -3.0208411  
H 2.4803479 0.6040526 -2.9351809  
C 0.3541067 1.0289925 -3.5050171  
H 0.4153497 2.0476196 -3.8583299  
C 2.7971838 1.3755800 0.5236065  
H 3.1631301 0.3971083 0.8537621  
H 3.2265607 1.5789029 -0.4625154  
C 3.1609800 2.4971289 1.5352451  
H 4.0234956 3.0831747 1.2053702  
H 3.4125531 2.0570072 2.5078671  
C 1.8909282 3.3601434 1.6745475  
H 1.8267150 3.8947095 2.6254610  
H 1.8264889 4.0903595 0.8620150  
C 0.7595148 2.3231992 1.5252348  
H 0.7089808 1.7413379 2.4605505  
C -0.6371690 2.8863132 1.3288036  
H -1.2443138 2.7172543 -0.0881363  
O -1.1995542 3.4997323 2.2200007  
C -0.1815207 3.2681041 -0.9963209  
C 1.0203766 2.6226082 -1.1651848

H -0.2916023 4.2756926 -1.3960990  
C -2.5067411 3.5921817 -0.1660639  
H -3.2807868 3.2455542 0.5219476  
H -2.2446513 4.6118892 0.1267804  
H -2.9049965 3.6182064 -1.1834967  
C -2.9171462 0.9137214 -0.9608288  
H -2.9731585 -0.1108971 -1.3371863  
H -3.6803352 1.0283546 -0.1794403  
H -3.1816846 1.5858359 -1.7797169  
O 2.0736833 2.8693472 -1.7430592  
C -0.2108173 -2.1441113 0.8781972  
C -0.0310068 -3.2691592 -0.1461120  
O 0.9932684 -3.5591238 -0.7271486  
C -0.3609488 -2.7932142 2.2644195  
O -1.0840986 -2.3961031 3.1513278  
O -1.1958392 -3.9432506 -0.3131930  
O 0.4825121 -3.8428134 2.3905659  
C -1.1193120 -5.0747065 -1.2196280  
H -0.8265898 -4.7368006 -2.2169677  
H -0.3866822 -5.7965333 -0.8508475  
H -2.1225127 -5.4993646 -1.2273330  
C 0.4729828 -4.4858002 3.6933690  
H -0.5273658 -4.8662233 3.9130870  
H 1.1951170 -5.2972167 3.6119262  
H 0.7692358 -3.7696632 4.4635488

**P1<sup>O</sup>**

62

Energy = -2843.336703031

C 1.4251608 -1.0303342 -0.7696841  
C 1.1279838 1.3239078 -0.0536041  
C -0.1798669 0.5647897 0.1382138  
C -0.0154667 -0.7632764 -0.3704269  
C -1.1495630 0.8942192 1.2613615  
C -1.1161255 -1.6331513 -0.6105654  
H 1.5577531 -1.1155054 -1.8524657  
H 1.7949270 -1.9485895 -0.3051975  
H 1.3675054 1.9815305 0.7837466  
H 1.1353965 1.9380200 -0.9556724  
Co -1.2710724 0.1443224 -1.6193595  
C -0.1019303 0.8460055 -3.2149093  
H 0.9772463 0.9282844 -3.2211749  
C -0.8682297 -0.2923540 -3.6055571  
H -0.4694246 -1.2352115 -3.9565387  
C -2.2533351 0.0060715 -3.4097689  
H -3.0872445 -0.6520995 -3.6103308  
C -1.0106749 1.8591327 -2.7749978  
H -0.7462158 2.8310854 -2.3815369  
C -2.3322095 1.3463589 -2.8941464  
H -3.2311947 1.8601196 -2.5809840  
C -0.8083844 2.0479610 2.2089384  
H 0.2342285 1.9650216 2.5434168  
H -0.9522075 3.0223056 1.7336010  
C -1.7604333 1.8109115 3.3932814  
H -2.7596194 2.1588707 3.1139226  
H -1.4558711 2.3536141 4.2936464  
C -1.7616478 0.2777699 3.5989825  
H -1.0396898 -0.0167092 4.3663140  
H -2.7351769 -0.1095551 3.9111488  
C -1.3417929 -0.3166305 2.2259941  
H -0.3644598 -0.8130270 2.3235983  
C -2.2619471 -1.3942673 1.6782575  
C -2.4438534 -1.4021822 0.1468144  
O -2.8324883 -2.1903282 2.4035074  
C -2.8170138 0.0124294 -0.3432407  
C -2.4637192 1.1688566 0.4766620  
H -3.7987375 0.0786337 -0.8127074  
C -3.5333816 -2.3990894 -0.2483336  
H -3.2685914 -3.4210183 0.0340631  
H -4.4622856 -2.1428439 0.2676197



O -0.6135398 3.7504010 -1.6468624  
C -0.9191501 5.0929510 -2.1073480  
H -1.6410042 5.0514936 -2.9266351  
H -1.3382951 5.6007742 -1.2391539  
H -0.0071635 5.5870156 -2.4509674  
O 0.1500744 3.2929144 -3.7291259  
C 0.8589275 0.7569079 -3.1654487

O 0.3001143 -0.0004711 -3.9292939  
O 2.1720782 1.0707074 -3.2504330  
C 2.8467158 0.5397735 -4.4203295  
H 2.3866615 0.9508911 -5.3219604  
H 3.8819412 0.8650522 -4.3228510  
H 2.7758094 -0.5506008 -4.4393024
